# Supplementary material for: Efficacy of Integrating a Novel 16-Gene Biomarker Panel and Intelligence Classifiers for Differential Diagnosis of Rheumatoid Arthritis and Osteoarthritis
Source: MDPI journal article supplement (doi:10.3390/jcm8010050), 2019-01-06

# **Efficacy of integrating a novel 16-gene biomarker panel and intelligence classifiers for differential diagnosis of rheumatoid arthritis and osteoarthritis**

**Nguyen Phuoc Long<sup>1</sup>, Seongoh Park<sup>2</sup>, Nguyen Hoang Anh<sup>1</sup>, Jung Eun Min<sup>1</sup>, Sang Jun Yoon<sup>1</sup>, Hyung Min Kim<sup>1</sup>, Tran Diem Nghi<sup>3</sup>, Dong Kyu Lim<sup>1</sup>, Jeong Hill Park<sup>1</sup>, Johan Lim<sup>2</sup>, Sung Won Kwon<sup>1,\*</sup>**

<sup>1</sup> College of Pharmacy and Research Institute of Pharmaceutical Sciences, Seoul National University, Seoul 08826, Republic of Korea.

<sup>2</sup> Department of Statistics, Seoul National University, Seoul, 08826, Republic of Korea.

<sup>3</sup> School of Medicine, Vietnam National University, Ho Chi Minh 700000, Vietnam.

\* Correspondence: SWK ([swkwon@snu.ac.kr](mailto:swkwon@snu.ac.kr)); Tel.: +82-2-880-7844

**Table S1.** Microarray data sets employed in the current study

|                    | Author                               | Data set | Year | Platform                | Country | Participants |    |          |
|--------------------|--------------------------------------|----------|------|-------------------------|---------|--------------|----|----------|
|                    |                                      |          |      |                         |         | RA           | OA | Normalcy |
| RA versus OA       |                                      |          |      |                         |         |              |    |          |
|                    | Ungethuem <i>et al.</i> <sup>1</sup> | GSE1919  | 2004 | Affymetrix U95A         | Germany | 3            | 3  |          |
|                    | Chang <i>et al.</i>                  | GSE39340 | 2012 | Illumina V4.0           | China   | 10           | 7  |          |
|                    | Lauwery <i>et al.</i> <sup>2</sup>   | GSE36700 | 2012 | Affymetrix 133 Plus 2.0 | Belgium | 7            | 5  |          |
|                    | Kinne <i>et al.</i> <sup>3</sup>     | GSE55457 | 2014 | Affymetrix 133A         | Germany | 13           | 10 |          |
|                    | Stiehl <i>et al.</i> <sup>3</sup>    | GSE55584 | 2014 | Affymetrix 133A         | Germany | 10           | 6  |          |
|                    | Häupl <i>et al.</i> <sup>3</sup>     | GSE55235 | 2014 | Affymetrix 133A         | Germany | 10           | 10 |          |
| RA versus Normalcy |                                      |          |      |                         |         |              |    |          |
|                    | Ungethuem <i>et al.</i> <sup>1</sup> | GSE1919  | 2004 | Affymetrix U95A         | Germany | 3            |    | 5        |
|                    | Kinne <i>et al.</i> <sup>3</sup>     | GSE55457 | 2014 | Affymetrix 133A         | Germany | 13           |    | 10       |
|                    | Häupl <i>et al.</i> <sup>3</sup>     | GSE55235 | 2014 | Affymetrix 133A         | Germany | 10           |    | 10       |
| OA versus Normalcy |                                      |          |      |                         |         |              |    |          |
|                    | Ungethuem <i>et al.</i> <sup>1</sup> | GSE1919  | 2004 | Affymetrix U95A         | Germany |              | 3  | 5        |
|                    | Kinne <i>et al.</i> <sup>3</sup>     | GSE55457 | 2014 | Affymetrix 133A         | Germany |              | 10 | 10       |
|                    | Häupl <i>et al.</i> <sup>3</sup>     | GSE55235 | 2014 | Affymetrix 133A         | Germany |              | 10 | 10       |

Considering the biological and technical heterogeneity, we chose GSE1919, GSE39340, and GSE36700 for variable selection purpose as they were based on different microarray platforms and different sample properties. The established signature was then tested using three other datasets from the same study (GSE55457, GSE55584, and GSE55235). The number of samples for classification purpose is larger than that for variable selection purpose to ensure the training and the test set size.

## Reference

1. Ungethuem U, Haeupl T, Witt H, Koczan D, Krenn V, Huber H, et al. Molecular signatures and new candidates to target the pathogenesis of rheumatoid arthritis. *Physiological genomics*. 2010;42a(4):267-282.
2. Nzeusseu Toukap A, Galant C, Theate I, Maudoux AL, Lories RJ, Houssiau FA, et al. Identification of distinct gene expression profiles in the synovium of patients with systemic lupus erythematosus. *Arthritis and rheumatism*. 2007;56(5):1579-1588.
3. Woetzel D, Huber R, Kupfer P, Pohlers D, Pfaff M, Driesch D, et al. Identification of rheumatoid arthritis and osteoarthritis patients by transcriptome-based rule set generation. *Arthritis research & therapy*. 2014;16(2):R84.

**Table S2.** GO and KEGG enriched pathways in RA versus OA.**Table S2.1.** GO pathway enrichment in upregulated group of RA versus OA

| Pathway ID | Pathway description                                                   | Observed<br>gene count | False<br>discovery rate |
|------------|-----------------------------------------------------------------------|------------------------|-------------------------|
| GO.0006955 | Immune response                                                       | 94                     | 8.86E-50                |
| GO.0050776 | Regulation of immune response                                         | 71                     | 1.44E-41                |
| GO.0002376 | Immune system process                                                 | 101                    | 2.64E-41                |
| GO.0006952 | Defense response                                                      | 85                     | 6.94E-39                |
| GO.0002684 | Positive regulation of immune system process                          | 66                     | 4.52E-36                |
| GO.0002682 | Regulation of immune system process                                   | 79                     | 1.23E-34                |
| GO.0050778 | Positive regulation of immune response                                | 54                     | 7.78E-33                |
| GO.0007166 | Cell surface receptor signaling pathway                               | 92                     | 1.48E-32                |
| GO.0002252 | Immune effector process                                               | 42                     | 9.42E-25                |
| GO.0045087 | Innate immune response                                                | 56                     | 1.41E-23                |
| GO.0051249 | Regulation of lymphocyte activation                                   | 37                     | 2.40E-23                |
| GO.0002694 | Regulation of leukocyte activation                                    | 39                     | 3.29E-23                |
| GO.0007165 | Signal transduction                                                   | 120                    | 4.64E-23                |
| GO.0048583 | Regulation of response to stimulus                                    | 101                    | 4.64E-23                |
| GO.0050865 | Regulation of cell activation                                         | 40                     | 4.64E-23                |
| GO.0002253 | Activation of immune response                                         | 40                     | 5.42E-23                |
| GO.0002757 | Immune response-activating signal transduction                        | 38                     | 8.76E-23                |
| GO.0006950 | Response to stress                                                    | 102                    | 8.76E-23                |
| GO.0007159 | Leukocyte cell-cell adhesion                                          | 33                     | 1.10E-22                |
| GO.0002764 | Immune response-regulating signaling pathway                          | 41                     | 2.57E-22                |
| GO.0002429 | Immune response-activating cell surface<br>receptor signaling pathway | 33                     | 3.64E-22                |
| GO.0070486 | Leukocyte aggregation                                                 | 31                     | 4.46E-22                |
| GO.0046649 | Lymphocyte activation                                                 | 35                     | 5.82E-22                |
| GO.0016337 | Single organismal cell-cell adhesion                                  | 39                     | 6.73E-22                |
| GO.0050867 | Positive regulation of cell activation                                | 32                     | 6.73E-22                |
| GO.0019221 | Cytokine-mediated signaling pathway                                   | 37                     | 9.61E-22                |
| GO.0048584 | Positive regulation of response to stimulus                           | 74                     | 1.61E-21                |
| GO.0050851 | Antigen receptor-mediated signaling pathway                           | 24                     | 1.85E-21                |
| GO.0045321 | Leukocyte activation                                                  | 37                     | 1.87E-21                |
| GO.0002696 | Positive regulation of leukocyte activation                           | 31                     | 2.55E-21                |
| GO.0071345 | Cellular response to cytokine stimulus                                | 41                     | 6.35E-21                |
| GO.0044700 | Single organism signaling                                             | 120                    | 6.38E-21                |
| GO.0002768 | Immune response-regulating cell surface<br>receptor signaling pathway | 36                     | 7.41E-21                |
| GO.0034097 | Response to cytokine                                                  | 44                     | 7.95E-21                |
| GO.0051251 | Positive regulation of lymphocyte activation                          | 29                     | 2.23E-20                |
| GO.0071593 | Lymphocyte aggregation                                                | 29                     | 2.86E-20                |
| GO.1903037 | Regulation of leukocyte cell-cell adhesion                            | 30                     | 7.73E-20                |
| GO.0007154 | Cell communication                                                    | 119                    | 1.44E-19                |

|            |                                                     |     |          |
|------------|-----------------------------------------------------|-----|----------|
| GO.0001775 | Cell activation                                     | 42  | 3.76E-19 |
| GO.0050863 | Regulation of t cell activation                     | 29  | 4.27E-19 |
| GO.0042110 | T cell activation                                   | 27  | 4.06E-18 |
| GO.0022409 | Positive regulation of cell-cell adhesion           | 26  | 5.50E-18 |
| GO.0030155 | Regulation of cell adhesion                         | 39  | 6.68E-18 |
| GO.1903039 | Positive regulation of leukocyte cell-cell adhesion | 24  | 1.67E-17 |
| GO.0009607 | Response to biotic stimulus                         | 42  | 2.04E-17 |
| GO.0051707 | Response to other organism                          | 41  | 2.97E-17 |
| GO.0050852 | T cell receptor signaling pathway                   | 19  | 3.71E-17 |
| GO.0050896 | Response to stimulus                                | 136 | 6.21E-17 |
| GO.0050870 | Positive regulation of t cell activation            | 23  | 1.37E-16 |
| GO.0022407 | Regulation of cell-cell adhesion                    | 30  | 1.47E-16 |
| GO.0007155 | Cell adhesion                                       | 47  | 2.45E-16 |
| GO.0050900 | Leukocyte migration                                 | 26  | 3.08E-16 |
| GO.0001817 | Regulation of cytokine production                   | 35  | 7.81E-16 |
| GO.0070663 | Regulation of leukocyte proliferation               | 23  | 1.12E-15 |
| GO.0045785 | Positive regulation of cell adhesion                | 29  | 1.22E-15 |
| GO.0072676 | Lymphocyte migration                                | 13  | 2.64E-15 |
| GO.0031347 | Regulation of defense response                      | 40  | 3.35E-15 |
| GO.0051716 | Cellular response to stimulus                       | 121 | 4.38E-15 |
| GO.0050670 | Regulation of lymphocyte proliferation              | 22  | 5.34E-15 |
| GO.0006954 | Inflammatory response                               | 31  | 9.22E-15 |
| GO.0030098 | Lymphocyte differentiation                          | 23  | 9.29E-15 |
| GO.0002697 | Regulation of immune effector process               | 30  | 1.08E-14 |
| GO.1902105 | Regulation of leukocyte differentiation             | 24  | 2.21E-14 |
| GO.0048518 | Positive regulation of biological process           | 108 | 2.55E-14 |
| GO.0002250 | Adaptive immune response                            | 20  | 1.44E-13 |
| GO.0045580 | Regulation of t cell differentiation                | 17  | 2.57E-13 |
| GO.0098542 | Defense response to other organism                  | 27  | 3.35E-13 |
| GO.0001819 | Positive regulation of cytokine production          | 27  | 3.83E-13 |
| GO.0030217 | T cell differentiation                              | 18  | 4.24E-13 |
| GO.0042129 | Regulation of t cell proliferation                  | 18  | 4.87E-13 |
| GO.0050671 | Positive regulation of lymphocyte proliferation     | 17  | 5.70E-13 |
| GO.1902107 | Positive regulation of leukocyte differentiation    | 18  | 8.46E-13 |
| GO.0045619 | Regulation of lymphocyte differentiation            | 18  | 1.11E-12 |
| GO.1903706 | Regulation of hemopoiesis                           | 25  | 2.03E-12 |
| GO.0030595 | Leukocyte chemotaxis                                | 16  | 2.56E-12 |
| GO.0002703 | Regulation of leukocyte mediated immunity           | 18  | 3.18E-12 |
| GO.0002366 | Leukocyte activation involved in immune response    | 17  | 3.96E-12 |
| GO.0045088 | Regulation of innate immune response                | 26  | 4.21E-12 |
| GO.0009605 | Response to external stimulus                       | 58  | 4.59E-12 |
| GO.1902531 | Regulation of intracellular signal transduction     | 49  | 5.93E-12 |
| GO.0002819 | Regulation of adaptive immune response              | 16  | 6.38E-12 |
| GO.0009967 | Positive regulation of signal transduction          | 47  | 1.12E-11 |
| GO.0002521 | Leukocyte differentiation                           | 23  | 1.39E-11 |

|            |                                                                                                                                         |    |          |
|------------|-----------------------------------------------------------------------------------------------------------------------------------------|----|----------|
| GO.1902533 | Positive regulation of intracellular signal transduction                                                                                | 37 | 1.39E-11 |
| GO.0009615 | Response to virus                                                                                                                       | 21 | 1.59E-11 |
| GO.0048522 | Positive regulation of cellular process                                                                                                 | 93 | 2.36E-11 |
| GO.0009966 | Regulation of signal transduction                                                                                                       | 65 | 2.83E-11 |
| GO.0045621 | Positive regulation of lymphocyte differentiation                                                                                       | 14 | 2.83E-11 |
| GO.0010033 | Response to organic substance                                                                                                           | 66 | 3.06E-11 |
| GO.0051704 | Multi-organism process                                                                                                                  | 62 | 3.16E-11 |
| GO.0060326 | Cell chemotaxis                                                                                                                         | 18 | 3.84E-11 |
| GO.0046631 | Alpha-beta t cell activation                                                                                                            | 12 | 5.54E-11 |
| GO.0035556 | Intracellular signal transduction                                                                                                       | 55 | 7.19E-11 |
| GO.0023056 | Positive regulation of signaling                                                                                                        | 48 | 9.42E-11 |
| GO.0009617 | Response to bacterium                                                                                                                   | 27 | 1.07E-10 |
| GO.0002285 | Lymphocyte activation involved in immune response                                                                                       | 14 | 1.29E-10 |
| GO.0065009 | Regulation of molecular function                                                                                                        | 68 | 1.44E-10 |
| GO.0042102 | Positive regulation of t cell proliferation                                                                                             | 13 | 2.51E-10 |
| GO.0002460 | Adaptive immune response based on somatic recombination of immune receptors built from immunoglobulin superfamily domains               | 15 | 3.19E-10 |
| GO.0002822 | Regulation of adaptive immune response based on somatic recombination of immune receptors built from immunoglobulin superfamily domains | 14 | 4.42E-10 |
| GO.0023051 | Regulation of signaling                                                                                                                 | 67 | 5.81E-10 |
| GO.0080134 | Regulation of response to stress                                                                                                        | 46 | 6.53E-10 |
| GO.0002520 | Immune system development                                                                                                               | 29 | 1.10E-09 |
| GO.0045582 | Positive regulation of t cell differentiation                                                                                           | 12 | 1.10E-09 |
| GO.0070887 | Cellular response to chemical stimulus                                                                                                  | 60 | 1.19E-09 |
| GO.0002683 | Negative regulation of immune system process                                                                                            | 23 | 1.23E-09 |
| GO.0048247 | Lymphocyte chemotaxis                                                                                                                   | 8  | 1.23E-09 |
| GO.0010647 | Positive regulation of cell communication                                                                                               | 48 | 1.81E-09 |
| GO.0032496 | Response to lipopolysaccharide                                                                                                          | 20 | 3.11E-09 |
| GO.0007596 | Blood coagulation                                                                                                                       | 27 | 3.82E-09 |
| GO.0006968 | Cellular defense response                                                                                                               | 11 | 4.58E-09 |
| GO.0010646 | Regulation of cell communication                                                                                                        | 67 | 5.20E-09 |
| GO.0050853 | B cell receptor signaling pathway                                                                                                       | 9  | 5.20E-09 |
| GO.0046632 | Alpha-beta t cell differentiation                                                                                                       | 10 | 6.13E-09 |
| GO.0050790 | Regulation of catalytic activity                                                                                                        | 57 | 7.60E-09 |
| GO.0002443 | Leukocyte mediated immunity                                                                                                             | 15 | 9.01E-09 |
| GO.0048534 | Hematopoietic or lymphoid organ development                                                                                             | 27 | 1.01E-08 |
| GO.0071310 | Cellular response to organic substance                                                                                                  | 51 | 1.13E-08 |
| GO.0016477 | Cell migration                                                                                                                          | 31 | 1.21E-08 |
| GO.0009893 | Positive regulation of metabolic process                                                                                                | 75 | 1.30E-08 |
| GO.0060333 | Interferon-gamma-mediated signaling pathway                                                                                             | 11 | 1.32E-08 |
| GO.0034341 | Response to interferon-gamma                                                                                                            | 13 | 2.37E-08 |

|            |                                                         |    |          |
|------------|---------------------------------------------------------|----|----------|
| GO.0042127 | Regulation of cell proliferation                        | 44 | 2.37E-08 |
| GO.0072678 | T cell migration                                        | 7  | 2.47E-08 |
| GO.0002449 | Lymphocyte mediated immunity                            | 13 | 2.62E-08 |
| GO.0050777 | Negative regulation of immune response                  | 13 | 3.29E-08 |
| GO.0030097 | Hemopoiesis                                             | 25 | 3.63E-08 |
| GO.0071346 | Cellular response to interferon-gamma                   | 12 | 3.63E-08 |
| GO.0065008 | Regulation of biological quality                        | 67 | 3.86E-08 |
| GO.0002286 | T cell activation involved in immune response           | 10 | 5.77E-08 |
| GO.0051240 | Positive regulation of multicellular organismal process | 41 | 6.32E-08 |
| GO.0032879 | Regulation of localization                              | 56 | 6.87E-08 |
| GO.0070098 | Chemokine-mediated signaling pathway                    | 9  | 6.99E-08 |
| GO.0006915 | Apoptotic process                                       | 36 | 7.45E-08 |
| GO.0031349 | Positive regulation of defense response                 | 21 | 7.62E-08 |
| GO.0040011 | Locomotion                                              | 38 | 8.06E-08 |
| GO.0060341 | Regulation of cellular localization                     | 38 | 8.22E-08 |
| GO.0002706 | Regulation of lymphocyte mediated immunity              | 12 | 8.37E-08 |
| GO.0051674 | Localization of cell                                    | 31 | 8.70E-08 |
| GO.0006935 | Chemotaxis                                              | 27 | 8.81E-08 |
| GO.2000406 | Positive regulation of t cell migration                 | 7  | 9.32E-08 |
| GO.0048585 | Negative regulation of response to stimulus             | 40 | 9.73E-08 |
| GO.0002687 | Positive regulation of leukocyte migration              | 12 | 1.02E-07 |
| GO.0030335 | Positive regulation of cell migration                   | 20 | 1.02E-07 |
| GO.0046634 | Regulation of alpha-beta t cell activation              | 10 | 1.07E-07 |
| GO.0042060 | Wound healing                                           | 28 | 1.19E-07 |
| GO.0050864 | Regulation of b cell activation                         | 12 | 1.27E-07 |
| GO.0043067 | Regulation of programmed cell death                     | 41 | 1.37E-07 |
| GO.0044093 | Positive regulation of molecular function               | 46 | 1.38E-07 |
| GO.0045058 | T cell selection                                        | 8  | 1.38E-07 |
| GO.0042113 | B cell activation                                       | 13 | 1.42E-07 |
| GO.0050871 | Positive regulation of b cell activation                | 10 | 1.44E-07 |
| GO.0050707 | Regulation of cytokine secretion                        | 13 | 1.70E-07 |
| GO.0007162 | Negative regulation of cell adhesion                    | 16 | 1.75E-07 |
| GO.0051239 | Regulation of multicellular organismal process          | 56 | 1.79E-07 |
| GO.0051607 | Defense response to virus                               | 14 | 1.82E-07 |
| GO.0032844 | Regulation of homeostatic process                       | 20 | 2.13E-07 |
| GO.0009611 | Response to wounding                                    | 29 | 2.22E-07 |
| GO.0002685 | Regulation of leukocyte migration                       | 13 | 2.86E-07 |
| GO.0012501 | Programmed cell death                                   | 35 | 2.86E-07 |
| GO.2000401 | Regulation of lymphocyte migration                      | 8  | 2.86E-07 |
| GO.0060337 | Type i interferon signaling pathway                     | 10 | 2.94E-07 |
| GO.0071357 | Cellular response to type i interferon                  | 10 | 2.94E-07 |
| GO.0042981 | Regulation of apoptotic process                         | 40 | 3.36E-07 |
| GO.0032663 | Regulation of interleukin-2 production                  | 9  | 3.61E-07 |
| GO.0051223 | Regulation of protein transport                         | 28 | 4.04E-07 |
| GO.0042035 | Regulation of cytokine biosynthetic process             | 11 | 4.34E-07 |

|            |                                                               |     |          |
|------------|---------------------------------------------------------------|-----|----------|
| GO.0050854 | Regulation of antigen receptor-mediated signaling pathway     | 8   | 5.54E-07 |
| GO.0070201 | Regulation of establishment of protein localization           | 29  | 6.02E-07 |
| GO.0048519 | Negative regulation of biological process                     | 80  | 7.20E-07 |
| GO.0051049 | Regulation of transport                                       | 45  | 7.40E-07 |
| GO.0006928 | Movement of cell or subcellular component                     | 38  | 1.06E-06 |
| GO.0071216 | Cellular response to biotic stimulus                          | 13  | 1.06E-06 |
| GO.0042221 | Response to chemical                                          | 73  | 1.10E-06 |
| GO.0071353 | Cellular response to interleukin-4                            | 7   | 1.19E-06 |
| GO.0051247 | Positive regulation of protein metabolic process              | 39  | 1.27E-06 |
| GO.0071222 | Cellular response to lipopolysaccharide                       | 12  | 1.37E-06 |
| GO.0050715 | Positive regulation of cytokine secretion                     | 10  | 1.39E-06 |
| GO.0050727 | Regulation of inflammatory response                           | 16  | 1.39E-06 |
| GO.2000107 | Negative regulation of leukocyte apoptotic process            | 8   | 1.50E-06 |
| GO.2000026 | Regulation of multicellular organismal development            | 41  | 1.75E-06 |
| GO.0072503 | Cellular divalent inorganic cation homeostasis                | 17  | 1.93E-06 |
| GO.0031325 | Positive regulation of cellular metabolic process             | 60  | 2.11E-06 |
| GO.0065007 | Biological regulation                                         | 139 | 2.55E-06 |
| GO.0038093 | Fc receptor signaling pathway                                 | 15  | 2.62E-06 |
| GO.0042592 | Homeostatic process                                           | 37  | 2.62E-06 |
| GO.0051336 | Regulation of hydrolase activity                              | 36  | 2.87E-06 |
| GO.0050793 | Regulation of developmental process                           | 49  | 3.07E-06 |
| GO.0010604 | Positive regulation of macromolecule metabolic process        | 57  | 3.22E-06 |
| GO.0006875 | Cellular metal ion homeostasis                                | 19  | 3.52E-06 |
| GO.0048523 | Negative regulation of cellular process                       | 74  | 3.53E-06 |
| GO.0051050 | Positive regulation of transport                              | 29  | 3.59E-06 |
| GO.0001816 | Cytokine production                                           | 11  | 3.88E-06 |
| GO.0031341 | Regulation of cell killing                                    | 8   | 4.19E-06 |
| GO.0032845 | Negative regulation of homeostatic process                    | 10  | 4.19E-06 |
| GO.0002699 | Positive regulation of immune effector process                | 12  | 4.86E-06 |
| GO.0010819 | Regulation of t cell chemotaxis                               | 5   | 5.06E-06 |
| GO.0033993 | Response to lipid                                             | 27  | 5.49E-06 |
| GO.0002274 | Myeloid leukocyte activation                                  | 10  | 5.62E-06 |
| GO.0006874 | Cellular calcium ion homeostasis                              | 16  | 5.71E-06 |
| GO.0046640 | Regulation of alpha-beta t cell proliferation                 | 6   | 5.99E-06 |
| GO.0045089 | Positive regulation of innate immune response                 | 16  | 6.59E-06 |
| GO.0043069 | Negative regulation of programmed cell death                  | 28  | 6.65E-06 |
| GO.0040012 | Regulation of locomotion                                      | 25  | 7.48E-06 |
| GO.0050789 | Regulation of biological process                              | 134 | 7.51E-06 |
| GO.0050714 | Positive regulation of protein secretion                      | 13  | 7.66E-06 |
| GO.0002293 | Alpha-beta t cell differentiation involved in immune response | 6   | 7.83E-06 |
| GO.0002456 | T cell mediated immunity                                      | 6   | 7.83E-06 |



|            |                                                                                                                                                  |     |          |
|------------|--------------------------------------------------------------------------------------------------------------------------------------------------|-----|----------|
| GO.0019835 | Cytolysis                                                                                                                                        | 6   | 7.83E-06 |
| GO.1903034 | Regulation of response to wounding                                                                                                               | 18  | 7.95E-06 |
| GO.0050708 | Regulation of protein secretion                                                                                                                  | 18  | 9.73E-06 |
| GO.0051046 | Regulation of secretion                                                                                                                          | 24  | 9.90E-06 |
| GO.0032673 | Regulation of interleukin-4 production                                                                                                           | 6   | 1.02E-05 |
| GO.0002690 | Positive regulation of leukocyte chemotaxis                                                                                                      | 9   | 1.07E-05 |
| GO.0032101 | Regulation of response to external stimulus                                                                                                      | 28  | 1.12E-05 |
| GO.0042108 | Positive regulation of cytokine biosynthetic process                                                                                             | 8   | 1.30E-05 |
| GO.0002705 | Positive regulation of leukocyte mediated immunity                                                                                               | 9   | 1.32E-05 |
| GO.2000106 | Regulation of leukocyte apoptotic process                                                                                                        | 9   | 1.32E-05 |
| GO.0055082 | Cellular chemical homeostasis                                                                                                                    | 21  | 1.43E-05 |
| GO.0032386 | Regulation of intracellular transport                                                                                                            | 22  | 1.48E-05 |
| GO.0043085 | Positive regulation of catalytic activity                                                                                                        | 37  | 1.60E-05 |
| GO.0051246 | Regulation of protein metabolic process                                                                                                          | 52  | 1.60E-05 |
| GO.0043066 | Negative regulation of apoptotic process                                                                                                         | 27  | 1.85E-05 |
| GO.0050857 | Positive regulation of antigen receptor-mediated signaling pathway                                                                               | 5   | 1.86E-05 |
| GO.0001910 | Regulation of leukocyte mediated cytotoxicity                                                                                                    | 7   | 2.04E-05 |
| GO.0002824 | Positive regulation of adaptive immune response based on somatic recombination of immune receptors built from immunoglobulin superfamily domains | 8   | 2.15E-05 |
| GO.0032649 | Regulation of interferon-gamma production                                                                                                        | 9   | 2.20E-05 |
| GO.0001818 | Negative regulation of cytokine production                                                                                                       | 13  | 2.37E-05 |
| GO.2000145 | Regulation of cell motility                                                                                                                      | 23  | 2.41E-05 |
| GO.0033081 | Regulation of t cell differentiation in thymus                                                                                                   | 6   | 2.66E-05 |
| GO.0046641 | Positive regulation of alpha-beta t cell proliferation                                                                                           | 5   | 2.67E-05 |
| GO.0050801 | Ion homeostasis                                                                                                                                  | 21  | 2.67E-05 |
| GO.0046637 | Regulation of alpha-beta t cell differentiation                                                                                                  | 7   | 2.76E-05 |
| GO.1903530 | Regulation of secretion by cell                                                                                                                  | 22  | 2.99E-05 |
| GO.0002218 | Activation of innate immune response                                                                                                             | 14  | 3.19E-05 |
| GO.0002637 | Regulation of immunoglobulin production                                                                                                          | 7   | 3.20E-05 |
| GO.0030334 | Regulation of cell migration                                                                                                                     | 22  | 3.21E-05 |
| GO.0050794 | Regulation of cellular process                                                                                                                   | 128 | 3.55E-05 |
| GO.0002407 | Dendritic cell chemotaxis                                                                                                                        | 5   | 3.70E-05 |
| GO.0046635 | Positive regulation of alpha-beta t cell activation                                                                                              | 7   | 3.70E-05 |
| GO.0032479 | Regulation of type i interferon production                                                                                                       | 10  | 3.85E-05 |
| GO.0051222 | Positive regulation of protein transport                                                                                                         | 18  | 3.85E-05 |
| GO.0002639 | Positive regulation of immunoglobulin production                                                                                                 | 6   | 3.94E-05 |
| GO.0032735 | Positive regulation of interleukin-12 production                                                                                                 | 6   | 3.94E-05 |
| GO.0050850 | Positive regulation of calcium-mediated signaling                                                                                                | 6   | 3.94E-05 |

|            |                                                              |     |          |
|------------|--------------------------------------------------------------|-----|----------|
| GO.0032270 | Positive regulation of cellular protein metabolic process    | 34  | 4.01E-05 |
| GO.0050848 | Regulation of calcium-mediated signaling                     | 7   | 4.90E-05 |
| GO.0098771 | Inorganic ion homeostasis                                    | 20  | 4.93E-05 |
| GO.0070233 | Negative regulation of t cell apoptotic process              | 5   | 5.02E-05 |
| GO.0046425 | Regulation of jak-stat cascade                               | 9   | 5.36E-05 |
| GO.0002666 | Positive regulation of t cell tolerance induction            | 4   | 5.38E-05 |
| GO.0002693 | Positive regulation of cellular extravasation                | 4   | 5.38E-05 |
| GO.0032388 | Positive regulation of intracellular transport               | 16  | 5.46E-05 |
| GO.0045124 | Regulation of bone resorption                                | 6   | 5.82E-05 |
| GO.0045937 | Positive regulation of phosphate metabolic process           | 28  | 6.16E-05 |
| GO.0048878 | Chemical homeostasis                                         | 26  | 6.16E-05 |
| GO.1901700 | Response to oxygen-containing compound                       | 34  | 6.16E-05 |
| GO.0007204 | Positive regulation of cytosolic calcium ion concentration   | 11  | 6.53E-05 |
| GO.0032753 | Positive regulation of interleukin-4 production              | 5   | 6.62E-05 |
| GO.0042832 | Defense response to protozoan                                | 5   | 6.62E-05 |
| GO.0051209 | Release of sequestered calcium ion into cytosol              | 6   | 6.88E-05 |
| GO.0008284 | Positive regulation of cell proliferation                    | 25  | 7.21E-05 |
| GO.0043122 | Regulation of i-kappab kinase/nf-kappab signaling            | 13  | 8.40E-05 |
| GO.1903649 | Regulation of cytoplasmic transport                          | 18  | 8.52E-05 |
| GO.0010818 | T cell chemotaxis                                            | 4   | 9.09E-05 |
| GO.0038096 | Fc-gamma receptor signaling pathway involved in phagocytosis | 8   | 9.34E-05 |
| GO.2000514 | Regulation of cd4-positive                                   |     |          |
| GO.0030168 | Platelet activation                                          | 13  | 0.000104 |
| GO.0042093 | T-helper cell differentiation                                | 5   | 0.000111 |
| GO.0001932 | Regulation of protein phosphorylation                        | 31  | 0.000114 |
| GO.0002758 | Innate immune response-activating signal transduction        | 13  | 0.000119 |
| GO.0051345 | Positive regulation of hydrolase activity                    | 25  | 0.000128 |
| GO.0019220 | Regulation of phosphate metabolic process                    | 36  | 0.00013  |
| GO.0044763 | Single-organism cellular process                             | 136 | 0.00013  |
| GO.0030890 | Positive regulation of b cell proliferation                  | 6   | 0.000132 |
| GO.0002695 | Negative regulation of leukocyte activation                  | 10  | 0.000136 |
| GO.0010820 | Positive regulation of t cell chemotaxis                     | 4   | 0.000139 |
| GO.0034103 | Regulation of tissue remodeling                              | 7   | 0.000143 |
| GO.0051047 | Positive regulation of secretion                             | 15  | 0.000156 |
| GO.0008283 | Cell proliferation                                           | 22  | 0.000158 |
| GO.0042325 | Regulation of phosphorylation                                | 32  | 0.000164 |
| GO.0046651 | Lymphocyte proliferation                                     | 8   | 0.000171 |
| GO.0044092 | Negative regulation of molecular function                    | 29  | 0.000183 |
| GO.0044403 | Symbiosis                                                    |     |          |
| GO.0051241 | Negative regulation of multicellular organismal process      | 27  | 0.000191 |

|            |                                                                     |    |          |
|------------|---------------------------------------------------------------------|----|----------|
| GO.0043901 | Negative regulation of multi-organism process                       | 10 | 0.000192 |
| GO.0031295 | T cell costimulation                                                | 7  | 0.000196 |
| GO.0042509 | Regulation of tyrosine phosphorylation of stat protein              | 7  | 0.000196 |
| GO.0050868 | Negative regulation of t cell activation                            | 8  | 0.000199 |
| GO.2000021 | Regulation of ion homeostasis                                       | 11 | 0.000199 |
| GO.0002704 | Negative regulation of leukocyte mediated immunity                  | 6  | 0.0002   |
| GO.0038083 | Peptidyl-tyrosine autophosphorylation                               | 6  | 0.0002   |
| GO.1903532 | Positive regulation of secretion by cell                            | 14 | 0.000202 |
| GO.0007169 | Transmembrane receptor protein tyrosine kinase signaling pathway    | 22 | 0.000246 |
| GO.0002688 | Regulation of leukocyte chemotaxis                                  | 8  | 0.000255 |
| GO.0031334 | Positive regulation of protein complex assembly                     | 10 | 0.000255 |
| GO.0051250 | Negative regulation of lymphocyte activation                        | 9  | 0.000261 |
| GO.0002698 | Negative regulation of immune effector process                      | 8  | 0.000297 |
| GO.0032268 | Regulation of cellular protein metabolic process                    | 46 | 0.000297 |
| GO.0033089 | Positive regulation of t cell differentiation in thymus             | 4  | 0.000297 |
| GO.1903305 | Regulation of regulated secretory pathway                           | 6  | 0.000302 |
| GO.0002828 | Regulation of type 2 immune response                                | 5  | 0.000316 |
| GO.0031399 | Regulation of protein modification process                          | 36 | 0.000351 |
| GO.0046427 | Positive regulation of jak-stat cascade                             | 7  | 0.000353 |
| GO.0016032 | Viral process                                                       | 22 | 0.00036  |
| GO.1903555 | Regulation of tumor necrosis factor superfamily cytokine production | 8  | 0.000371 |
| GO.0042742 | Defense response to bacterium                                       | 11 | 0.000372 |
| GO.0042327 | Positive regulation of phosphorylation                              | 24 | 0.000387 |
| GO.0046777 | Protein autophosphorylation                                         | 11 | 0.000387 |
| GO.0050731 | Positive regulation of peptidyl-tyrosine phosphorylation            | 10 | 0.000387 |
| GO.0051092 | Positive regulation of nf-kappab transcription factor activity      | 9  | 0.000399 |
| GO.0045595 | Regulation of cell differentiation                                  | 34 | 0.000427 |
| GO.0002707 | Negative regulation of lymphocyte mediated immunity                 | 5  | 0.000449 |
| GO.0050856 | Regulation of t cell receptor signaling pathway                     | 5  | 0.000449 |
| GO.0043900 | Regulation of multi-organism process                                | 17 | 0.000467 |
| GO.0034113 | Heterotypic cell-cell adhesion                                      | 5  | 0.000537 |
| GO.0006909 | Phagocytosis                                                        | 10 | 0.000557 |
| GO.0006959 | Humoral immune response                                             | 9  | 0.000571 |
| GO.0031348 | Negative regulation of defense response                             | 9  | 0.000571 |
| GO.0001934 | Positive regulation of protein phosphorylation                      | 23 | 0.000585 |
| GO.0051094 | Positive regulation of developmental process                        | 28 | 0.000606 |
| GO.0052548 | Regulation of endopeptidase activity                                | 15 | 0.00061  |
| GO.0019222 | Regulation of metabolic process                                     | 94 | 0.000614 |
| GO.0045597 | Positive regulation of cell differentiation                         | 23 | 0.000617 |

|            |                                                                                                                                                  |    |          |
|------------|--------------------------------------------------------------------------------------------------------------------------------------------------|----|----------|
| GO.0002823 | Negative regulation of adaptive immune response based on somatic recombination of immune receptors built from immunoglobulin superfamily domains | 5  | 0.000622 |
| GO.0051281 | Positive regulation of release of sequestered calcium ion into cytosol                                                                           | 5  | 0.000622 |
| GO.0022408 | Negative regulation of cell-cell adhesion                                                                                                        | 9  | 0.000633 |
| GO.0009968 | Negative regulation of signal transduction                                                                                                       | 27 | 0.000689 |
| GO.0032703 | Negative regulation of interleukin-2 production                                                                                                  | 4  | 0.000713 |
| GO.0071621 | Granulocyte chemotaxis                                                                                                                           | 6  | 0.000759 |
| GO.1903557 | Positive regulation of tumor necrosis factor superfamily cytokine production                                                                     | 6  | 0.000759 |
| GO.0097529 | Myeloid leukocyte migration                                                                                                                      | 7  | 0.000905 |
| GO.0043086 | Negative regulation of catalytic activity                                                                                                        | 23 | 0.000947 |
| GO.0045824 | Negative regulation of innate immune response                                                                                                    | 5  | 0.001    |
| GO.1903651 | Positive regulation of cytoplasmic transport                                                                                                     | 12 | 0.00101  |
| GO.0007259 | Jak-stat cascade                                                                                                                                 | 6  | 0.00104  |
| GO.0032729 | Positive regulation of interferon-gamma production                                                                                               | 6  | 0.00104  |
| GO.0042531 | Positive regulation of tyrosine phosphorylation of stat protein                                                                                  | 6  | 0.00104  |
| GO.0070228 | Regulation of lymphocyte apoptotic process                                                                                                       | 6  | 0.00104  |
| GO.0050920 | Regulation of chemotaxis                                                                                                                         | 9  | 0.0011   |
| GO.0051346 | Negative regulation of hydrolase activity                                                                                                        | 15 | 0.00115  |
| GO.0045061 | Thymic t cell selection                                                                                                                          | 4  | 0.00117  |
| GO.0001959 | Regulation of cytokine-mediated signaling pathway                                                                                                | 8  | 0.00131  |
| GO.0032743 | Positive regulation of interleukin-2 production                                                                                                  | 5  | 0.00131  |
| GO.0070232 | Regulation of t cell apoptotic process                                                                                                           | 5  | 0.00131  |
| GO.2000116 | Regulation of cysteine-type endopeptidase activity                                                                                               | 11 | 0.00132  |
| GO.0048872 | Homeostasis of number of cells                                                                                                                   | 10 | 0.00134  |
| GO.0023057 | Negative regulation of signaling                                                                                                                 | 28 | 0.00138  |
| GO.0048535 | Lymph node development                                                                                                                           | 4  | 0.00146  |
| GO.0031401 | Positive regulation of protein modification process                                                                                              | 26 | 0.00149  |
| GO.0033003 | Regulation of mast cell activation                                                                                                               | 5  | 0.00149  |
| GO.0032846 | Positive regulation of homeostatic process                                                                                                       | 9  | 0.00155  |
| GO.0051090 | Regulation of sequence-specific dna binding transcription factor activity                                                                        | 14 | 0.00155  |
| GO.0071396 | Cellular response to lipid                                                                                                                       | 14 | 0.00155  |
| GO.0010648 | Negative regulation of cell communication                                                                                                        | 28 | 0.00156  |
| GO.0045859 | Regulation of protein kinase activity                                                                                                            | 20 | 0.00157  |
| GO.0022603 | Regulation of anatomical structure morphogenesis                                                                                                 | 23 | 0.00158  |
| GO.0045084 | Positive regulation of interleukin-12 biosynthetic process                                                                                       | 3  | 0.00158  |

|            |                                                                                           |    |         |
|------------|-------------------------------------------------------------------------------------------|----|---------|
| GO.0050862 | Positive regulation of t cell receptor signaling pathway                                  | 3  | 0.00158 |
| GO.0034612 | Response to tumor necrosis factor                                                         | 8  | 0.00162 |
| GO.0007167 | Enzyme linked receptor protein signaling pathway                                          | 24 | 0.00163 |
| GO.0042119 | Neutrophil activation                                                                     | 4  | 0.00177 |
| GO.0043368 | Positive t cell selection                                                                 | 4  | 0.00177 |
| GO.0031324 | Negative regulation of cellular metabolic process                                         | 43 | 0.00183 |
| GO.0050729 | Positive regulation of inflammatory response                                              | 7  | 0.00184 |
| GO.0002886 | Regulation of myeloid leukocyte mediated immunity                                         | 5  | 0.00188 |
| GO.0043300 | Regulation of leukocyte degranulation                                                     | 5  | 0.00188 |
| GO.0046638 | Positive regulation of alpha-beta t cell differentiation                                  | 5  | 0.00188 |
| GO.2000351 | Regulation of endothelial cell apoptotic process                                          | 5  | 0.00188 |
| GO.0010951 | Negative regulation of endopeptidase activity                                             | 11 | 0.0021  |
| GO.0032680 | Regulation of tumor necrosis factor production                                            | 7  | 0.0021  |
| GO.0043154 | Negative regulation of cysteine-type endopeptidase activity involved in apoptotic process | 7  | 0.0021  |
| GO.0010557 | Positive regulation of macromolecule biosynthetic process                                 | 34 | 0.00212 |
| GO.0042100 | B cell proliferation                                                                      | 5  | 0.00212 |
| GO.0002825 | Regulation of t-helper 1 type immune response                                             | 4  | 0.00213 |
| GO.0043087 | Regulation of gtpase activity                                                             | 17 | 0.00218 |
| GO.0050795 | Regulation of behavior                                                                    | 10 | 0.00225 |
| GO.0002708 | Positive regulation of lymphocyte mediated immunity                                       | 6  | 0.0023  |
| GO.0043547 | Positive regulation of gtpase activity                                                    | 16 | 0.00234 |
| GO.0009891 | Positive regulation of biosynthetic process                                               | 36 | 0.00237 |
| GO.0033628 | Regulation of cell adhesion mediated by integrin                                          | 5  | 0.00237 |
| GO.0033632 | Regulation of cell-cell adhesion mediated by integrin                                     | 3  | 0.00237 |
| GO.0034121 | Regulation of toll-like receptor signaling pathway                                        | 5  | 0.00237 |
| GO.0051130 | Positive regulation of cellular component organization                                    | 27 | 0.00256 |
| GO.0002889 | Regulation of immunoglobulin mediated immune response                                     | 5  | 0.00265 |
| GO.0019882 | Antigen processing and presentation                                                       | 10 | 0.00284 |
| GO.0071356 | Cellular response to tumor necrosis factor                                                | 7  | 0.00287 |
| GO.0002709 | Regulation of t cell mediated immunity                                                    | 5  | 0.00296 |
| GO.0032648 | Regulation of interferon-beta production                                                  | 5  | 0.00296 |
| GO.0002573 | Myeloid leukocyte differentiation                                                         | 7  | 0.00302 |
| GO.0010605 | Negative regulation of macromolecule metabolic process                                    | 42 | 0.00302 |

|            |                                                                                        |    |         |
|------------|----------------------------------------------------------------------------------------|----|---------|
| GO.0043254 | Regulation of protein complex assembly                                                 | 12 | 0.00302 |
| GO.0044089 | Positive regulation of cellular component biogenesis                                   | 13 | 0.00302 |
| GO.1902624 | Positive regulation of neutrophil migration                                            | 4  | 0.00302 |
| GO.0051279 | Regulation of release of sequestered calcium ion into cytosol                          | 6  | 0.00313 |
| GO.0070664 | Negative regulation of leukocyte proliferation                                         | 6  | 0.00313 |
| GO.0006897 | Endocytosis                                                                            | 16 | 0.00318 |
| GO.0032480 | Negative regulation of type i interferon production                                    | 5  | 0.00326 |
| GO.0001911 | Negative regulation of leukocyte mediated cytotoxicity                                 | 3  | 0.00333 |
| GO.0002313 | Mature b cell differentiation involved in immune response                              | 3  | 0.00333 |
| GO.0002676 | Regulation of chronic inflammatory response                                            | 3  | 0.00333 |
| GO.0031328 | Positive regulation of cellular biosynthetic process                                   | 35 | 0.00333 |
| GO.0045779 | Negative regulation of bone resorption                                                 | 3  | 0.00333 |
| GO.0048302 | Regulation of isotype switching to igg isotypes                                        | 3  | 0.00333 |
| GO.0042267 | Natural killer cell mediated cytotoxicity                                              | 4  | 0.0035  |
| GO.1903307 | Positive regulation of regulated secretory pathway                                     | 4  | 0.0035  |
| GO.0001866 | Nk t cell proliferation                                                                | 2  | 0.00353 |
| GO.0002457 | T cell antigen processing and presentation                                             | 2  | 0.00353 |
| GO.0003366 | Cell-matrix adhesion involved in ameboidal cell migration                              | 2  | 0.00353 |
| GO.0038111 | Interleukin-7-mediated signaling pathway                                               | 2  | 0.00353 |
| GO.0043366 | Beta selection                                                                         | 2  | 0.00353 |
| GO.0051924 | Regulation of calcium ion transport                                                    | 10 | 0.00353 |
| GO.0098761 | Cellular response to interleukin-7                                                     | 2  | 0.00353 |
| GO.2000309 | Positive regulation of tumor necrosis factor (ligand) superfamily member 11 production | 2  | 0.00353 |
| GO.2000412 | Positive regulation of thymocyte migration                                             | 2  | 0.00353 |
| GO.2000473 | Positive regulation of hematopoietic stem cell migration                               | 2  | 0.00353 |
| GO.2000564 | Regulation of cd8-positive                                                             |    |         |
| GO.0038095 | Fc-epsilon receptor signaling pathway                                                  | 9  | 0.00356 |
| GO.0006816 | Calcium ion transport                                                                  | 10 | 0.00363 |
| GO.0010628 | Positive regulation of gene expression                                                 | 34 | 0.00409 |
| GO.0009892 | Negative regulation of metabolic process                                               | 45 | 0.00438 |
| GO.0045589 | Regulation of regulatory t cell differentiation                                        | 3  | 0.00449 |
| GO.2000345 | Regulation of hepatocyte proliferation                                                 | 3  | 0.00449 |
| GO.0034105 | Positive regulation of tissue remodeling                                               | 4  | 0.00469 |
| GO.0043123 | Positive regulation of i-kappab kinase/nf-kappab signaling                             | 9  | 0.00478 |
| GO.0051091 | Positive regulation of sequence-specific dna binding transcription factor activity     | 10 | 0.00487 |

|            |                                                                                                             |    |         |
|------------|-------------------------------------------------------------------------------------------------------------|----|---------|
| GO.0051179 | Localization                                                                                                | 67 | 0.00487 |
| GO.0030162 | Regulation of proteolysis                                                                                   | 20 | 0.00515 |
| GO.0044707 | Single-multicellular organism process                                                                       | 80 | 0.00541 |
| GO.2000516 | Positive regulation of cd4-positive                                                                         |    |         |
| GO.0051928 | Positive regulation of calcium ion transport                                                                | 7  | 0.00551 |
| GO.0032760 | Positive regulation of tumor necrosis factor production                                                     | 5  | 0.00571 |
| GO.0032103 | Positive regulation of response to external stimulus                                                        | 13 | 0.00595 |
| GO.0035458 | Cellular response to interferon-beta                                                                        | 3  | 0.00595 |
| GO.0045060 | Negative thymic t cell selection                                                                            | 3  | 0.00595 |
| GO.0030833 | Regulation of actin filament polymerization                                                                 | 7  | 0.00611 |
| GO.0007229 | Integrin-mediated signaling pathway                                                                         | 6  | 0.00617 |
| GO.0043299 | Leukocyte degranulation                                                                                     | 4  | 0.00617 |
| GO.0060142 | Regulation of syncytium formation by plasma membrane fusion                                                 | 4  | 0.00617 |
| GO.0001906 | Cell killing                                                                                                | 5  | 0.00677 |
| GO.0042130 | Negative regulation of t cell proliferation                                                                 | 5  | 0.00677 |
| GO.0032501 | Multicellular organismal process                                                                            | 82 | 0.00693 |
| GO.0050688 | Regulation of defense response to virus                                                                     | 9  | 0.00697 |
| GO.0030101 | Natural killer cell activation                                                                              | 5  | 0.0074  |
| GO.0002761 | Regulation of myeloid leukocyte differentiation                                                             | 7  | 0.00751 |
| GO.0002532 | Production of molecular mediator involved in inflammatory response                                          | 3  | 0.00766 |
| GO.0043304 | Regulation of mast cell degranulation                                                                       | 4  | 0.00804 |
| GO.0045581 | Negative regulation of t cell differentiation                                                               | 4  | 0.00804 |
| GO.2001233 | Regulation of apoptotic signaling pathway                                                                   | 13 | 0.00816 |
| GO.0034138 | Toll-like receptor 3 signaling pathway                                                                      | 6  | 0.00848 |
| GO.1902106 | Negative regulation of leukocyte differentiation                                                            | 6  | 0.00848 |
| GO.0051495 | Positive regulation of cytoskeleton organization                                                            | 8  | 0.00867 |
| GO.0051153 | Regulation of striated muscle cell differentiation                                                          | 6  | 0.00903 |
| GO.0043370 | Regulation of cd4-positive                                                                                  |    |         |
| GO.0048731 | System development                                                                                          | 57 | 0.00924 |
| GO.0030099 | Myeloid cell differentiation                                                                                | 9  | 0.00929 |
| GO.0002291 | T cell activation via t cell receptor contact with antigen bound to mhc molecule on antigen presenting cell | 2  | 0.00948 |
| GO.0006468 | Protein phosphorylation                                                                                     | 20 | 0.00948 |
| GO.0034124 | Regulation of myd88-dependent toll-like receptor signaling pathway                                          | 2  | 0.00948 |
| GO.0043950 | Positive regulation of camp-mediated signaling                                                              | 3  | 0.00948 |
| GO.0045086 | Positive regulation of interleukin-2 biosynthetic process                                                   | 3  | 0.00948 |
| GO.0045780 | Positive regulation of bone resorption                                                                      | 3  | 0.00948 |
| GO.0072540 | T-helper 17 cell lineage commitment                                                                         | 2  | 0.00948 |
| GO.0090026 | Positive regulation of monocyte chemotaxis                                                                  | 3  | 0.00948 |
| GO.0030183 | B cell differentiation                                                                                      | 6  | 0.00999 |

|            |                                                                                  |    |        |
|------------|----------------------------------------------------------------------------------|----|--------|
| GO.0002312 | B cell activation involved in immune response                                    | 4  | 0.01   |
| GO.0046627 | Negative regulation of insulin receptor signaling pathway                        | 4  | 0.01   |
| GO.0045893 | Positive regulation of transcription                                             |    |        |
| GO.0033209 | Tumor necrosis factor-mediated signaling pathway                                 | 4  | 0.0112 |
| GO.0050663 | Cytokine secretion                                                               | 4  | 0.0112 |
| GO.0097028 | Dendritic cell differentiation                                                   | 4  | 0.0112 |
| GO.0002577 | Regulation of antigen processing and presentation                                | 3  | 0.0116 |
| GO.0002710 | Negative regulation of t cell mediated immunity                                  | 3  | 0.0116 |
| GO.0002827 | Positive regulation of t-helper 1 type immune response                           | 3  | 0.0116 |
| GO.0002830 | Positive regulation of type 2 immune response                                    | 3  | 0.0116 |
| GO.0043306 | Positive regulation of mast cell degranulation                                   | 3  | 0.0116 |
| GO.0045579 | Positive regulation of b cell differentiation                                    | 3  | 0.0116 |
| GO.0051044 | Positive regulation of membrane protein ectodomain proteolysis                   | 3  | 0.0116 |
| GO.0033674 | Positive regulation of kinase activity                                           | 14 | 0.012  |
| GO.0002220 | Innate immune response activating cell surface receptor signaling pathway        | 7  | 0.0123 |
| GO.0051338 | Regulation of transferase activity                                               | 21 | 0.0124 |
| GO.0032956 | Regulation of actin cytoskeleton organization                                    | 10 | 0.0126 |
| GO.0042990 | Regulation of transcription factor import into nucleus                           | 6  | 0.0131 |
| GO.0043281 | Regulation of cysteine-type endopeptidase activity involved in apoptotic process | 9  | 0.0135 |
| GO.0002544 | Chronic inflammatory response                                                    | 3  | 0.014  |
| GO.0032609 | Interferon-gamma production                                                      | 3  | 0.014  |
| GO.0032656 | Regulation of interleukin-13 production                                          | 3  | 0.014  |
| GO.0002673 | Regulation of acute inflammatory response                                        | 5  | 0.0143 |
| GO.0080090 | Regulation of primary metabolic process                                          | 77 | 0.0143 |
| GO.0019538 | Protein metabolic process                                                        | 61 | 0.0144 |
| GO.0051173 | Positive regulation of nitrogen compound metabolic process                       | 33 | 0.0149 |
| GO.0033157 | Regulation of intracellular protein transport                                    | 12 | 0.015  |
| GO.0031343 | Positive regulation of cell killing                                              | 4  | 0.0151 |
| GO.0071622 | Regulation of granulocyte chemotaxis                                             | 4  | 0.0151 |
| GO.0030838 | Positive regulation of actin filament polymerization                             | 5  | 0.0152 |
| GO.0008285 | Negative regulation of cell proliferation                                        | 17 | 0.0156 |
| GO.1903707 | Negative regulation of hemopoiesis                                               | 7  | 0.0157 |
| GO.0031323 | Regulation of cellular metabolic process                                         | 79 | 0.0158 |
| GO.0032653 | Regulation of interleukin-10 production                                          | 4  | 0.0166 |
| GO.0042510 | Regulation of tyrosine phosphorylation of stat1 protein                          | 3  | 0.0166 |
| GO.0070234 | Positive regulation of t cell apoptotic process                                  | 3  | 0.0166 |



|            |                                                                      |    |        |
|------------|----------------------------------------------------------------------|----|--------|
| GO.0001915 | Negative regulation of t cell mediated cytotoxicity                  | 2  | 0.0169 |
| GO.0033634 | Positive regulation of cell-cell adhesion mediated by integrin       | 2  | 0.0169 |
| GO.0035771 | Interleukin-4-mediated signaling pathway                             | 2  | 0.0169 |
| GO.0038110 | Interleukin-2-mediated signaling pathway                             | 2  | 0.0169 |
| GO.0045064 | T-helper 2 cell differentiation                                      | 2  | 0.0169 |
| GO.0071352 | Cellular response to interleukin-2                                   | 2  | 0.0169 |
| GO.1903036 | Positive regulation of response to wounding                          | 7  | 0.0169 |
| GO.2000110 | Negative regulation of macrophage apoptotic process                  | 2  | 0.0169 |
| GO.0060255 | Regulation of macromolecule metabolic process                        | 76 | 0.0172 |
| GO.0097305 | Response to alcohol                                                  | 11 | 0.0174 |
| GO.0001914 | Regulation of t cell mediated cytotoxicity                           | 3  | 0.0194 |
| GO.0016064 | Immunoglobulin mediated immune response                              | 5  | 0.0194 |
| GO.0002221 | Pattern recognition receptor signaling pathway                       | 7  | 0.0198 |
| GO.0045860 | Positive regulation of protein kinase activity                       | 13 | 0.0198 |
| GO.1901701 | Cellular response to oxygen-containing compound                      | 19 | 0.0213 |
| GO.0016192 | Vesicle-mediated transport                                           | 24 | 0.0228 |
| GO.0033630 | Positive regulation of cell adhesion mediated by integrin            | 3  | 0.0228 |
| GO.0045576 | Mast cell activation                                                 | 3  | 0.0228 |
| GO.0045921 | Positive regulation of exocytosis                                    | 5  | 0.0235 |
| GO.0002920 | Regulation of humoral immune response                                | 4  | 0.0236 |
| GO.0032651 | Regulation of interleukin-1 beta production                          | 4  | 0.0236 |
| GO.0060338 | Regulation of type i interferon-mediated signaling pathway           | 4  | 0.0236 |
| GO.1903827 | Regulation of cellular protein localization                          | 14 | 0.0248 |
| GO.0010638 | Positive regulation of organelle organization                        | 16 | 0.0249 |
| GO.0014066 | Regulation of phosphatidylinositol 3-kinase signaling                | 5  | 0.0249 |
| GO.0045637 | Regulation of myeloid cell differentiation                           | 8  | 0.0259 |
| GO.2001242 | Regulation of intrinsic apoptotic signaling pathway                  | 7  | 0.0259 |
| GO.0001820 | Serotonin secretion                                                  | 2  | 0.0263 |
| GO.0002438 | Acute inflammatory response to antigenic stimulus                    | 2  | 0.0263 |
| GO.0002767 | Immune response-inhibiting cell surface receptor signaling pathway   | 2  | 0.0263 |
| GO.0008626 | Granzyme-mediated apoptotic signaling pathway                        | 2  | 0.0263 |
| GO.0032633 | Interleukin-4 production                                             | 2  | 0.0263 |
| GO.0034242 | Negative regulation of syncytium formation by plasma membrane fusion | 2  | 0.0263 |
| GO.0035455 | Response to interferon-alpha                                         | 3  | 0.0263 |
| GO.0043011 | Myeloid dendritic cell differentiation                               | 3  | 0.0263 |

|            |                                                                         |    |        |
|------------|-------------------------------------------------------------------------|----|--------|
| GO.0050858 | Negative regulation of antigen receptor-mediated signaling pathway      | 3  | 0.0263 |
| GO.0072538 | T-helper 17 type immune response                                        | 2  | 0.0263 |
| GO.0072539 | T-helper 17 cell differentiation                                        | 2  | 0.0263 |
| GO.2000347 | Positive regulation of hepatocyte proliferation                         | 2  | 0.0263 |
| GO.0051347 | Positive regulation of transferase activity                             | 15 | 0.0269 |
| GO.0045935 | Positive regulation of nucleobase-containing compound metabolic process | 31 | 0.0274 |
| GO.0030593 | Neutrophil chemotaxis                                                   | 4  | 0.0275 |
| GO.0090066 | Regulation of anatomical structure size                                 | 11 | 0.0279 |
| GO.0097190 | Apoptotic signaling pathway                                             | 11 | 0.0285 |
| GO.0006979 | Response to oxidative stress                                            | 11 | 0.0292 |
| GO.0051248 | Negative regulation of protein metabolic process                        | 22 | 0.0292 |
| GO.0032461 | Positive regulation of protein oligomerization                          | 3  | 0.0296 |
| GO.0090023 | Positive regulation of neutrophil chemotaxis                            | 3  | 0.0296 |
| GO.1901739 | Regulation of myoblast fusion                                           | 3  | 0.0296 |
| GO.0045765 | Regulation of angiogenesis                                              | 8  | 0.0316 |
| GO.0070372 | Regulation of erk1 and erk2 cascade                                     | 8  | 0.0337 |
| GO.0002437 | Inflammatory response to antigenic stimulus                             | 3  | 0.034  |
| GO.0032660 | Regulation of interleukin-17 production                                 | 3  | 0.034  |
| GO.0046903 | Secretion                                                               | 15 | 0.0343 |
| GO.0017157 | Regulation of exocytosis                                                | 7  | 0.0351 |
| GO.0035666 | Trif-dependent toll-like receptor signaling pathway                     | 5  | 0.0361 |
| GO.0002826 | Negative regulation of t-helper 1 type immune response                  | 2  | 0.0372 |
| GO.0042092 | Type 2 immune response                                                  | 2  | 0.0372 |
| GO.0043320 | Natural killer cell degranulation                                       | 2  | 0.0372 |
| GO.0045063 | T-helper 1 cell differentiation                                         | 2  | 0.0372 |
| GO.0045588 | Positive regulation of gamma-delta t cell differentiation               | 2  | 0.0372 |
| GO.0045862 | Positive regulation of proteolysis                                      | 11 | 0.0372 |
| GO.0048304 | Positive regulation of isotype switching to igg isotypes                | 2  | 0.0372 |
| GO.0060710 | Chorio-allantoic fusion                                                 | 2  | 0.0372 |
| GO.1902715 | Positive regulation of interferon-gamma secretion                       | 2  | 0.0372 |
| GO.2000503 | Positive regulation of natural killer cell chemotaxis                   | 2  | 0.0372 |
| GO.0007568 | Aging                                                                   | 9  | 0.0378 |
| GO.0051125 | Regulation of actin nucleation                                          | 3  | 0.0379 |
| GO.1904292 | Regulation of erad pathway                                              | 3  | 0.0379 |
| GO.0051093 | Negative regulation of developmental process                            | 19 | 0.0383 |
| GO.0030198 | Extracellular matrix organization                                       | 11 | 0.0395 |
| GO.0045596 | Negative regulation of cell differentiation                             | 16 | 0.0401 |
| GO.0007267 | Cell-cell signaling                                                     | 20 | 0.0408 |

|            |                                                                                               |    |        |
|------------|-----------------------------------------------------------------------------------------------|----|--------|
| GO.0045471 | Response to ethanol                                                                           | 6  | 0.041  |
| GO.0032940 | Secretion by cell                                                                             | 13 | 0.0413 |
| GO.0048525 | Negative regulation of viral process                                                          | 5  | 0.0413 |
| GO.0043406 | Positive regulation of map kinase activity                                                    | 8  | 0.0415 |
| GO.0043410 | Positive regulation of mapk cascade                                                           | 12 | 0.0416 |
| GO.0032733 | Positive regulation of interleukin-10 production                                              | 3  | 0.042  |
| GO.0033077 | T cell differentiation in thymus                                                              | 4  | 0.042  |
| GO.0042993 | Positive regulation of transcription factor import into nucleus                               | 4  | 0.042  |
| GO.0043124 | Negative regulation of i-kappab kinase/nf-kappab signaling                                    | 4  | 0.042  |
| GO.0050706 | Regulation of interleukin-1 beta secretion                                                    | 3  | 0.042  |
| GO.0032481 | Positive regulation of type i interferon production                                           | 5  | 0.0428 |
| GO.0048660 | Regulation of smooth muscle cell proliferation                                                | 5  | 0.0428 |
| GO.0002223 | Stimulatory c-type lectin receptor signaling pathway                                          | 6  | 0.0471 |
| GO.0042269 | Regulation of natural killer cell mediated cytotoxicity                                       | 3  | 0.0471 |
| GO.0060334 | Regulation of interferon-gamma-mediated signaling pathway                                     | 3  | 0.0471 |
| GO.2000352 | Negative regulation of endothelial cell apoptotic process                                     | 3  | 0.0471 |
| GO.0001913 | T cell mediated cytotoxicity                                                                  | 2  | 0.0484 |
| GO.0002480 | Antigen processing and presentation of exogenous peptide antigen via MHC class I Cd8-positive |    |        |
| GO.0043374 |                                                                                               |    |        |
| GO.0045591 | Positive regulation of regulatory t cell differentiation                                      | 2  | 0.0484 |
| GO.0051126 | Negative regulation of actin nucleation                                                       | 2  | 0.0484 |
| GO.0060753 | Regulation of mast cell chemotaxis                                                            | 2  | 0.0484 |
| GO.0070424 | Regulation of nucleotide-binding oligomerization domain containing signaling pathway          | 2  | 0.0484 |
| GO.2001198 | Regulation of dendritic cell differentiation                                                  | 2  | 0.0484 |

---

**Table S2.2.** KEGG pathway enrichment in upregulated group of RA versus OA

| Pathway ID | Pathway description                          | Observed gene count | False discovery rate |
|------------|----------------------------------------------|---------------------|----------------------|
| 4650       | Natural killer cell mediated cytotoxicity    | 21                  | 1.27E-16             |
| 5340       | Primary immunodeficiency                     | 14                  | 1.27E-16             |
| 4060       | Cytokine-cytokine receptor interaction       | 27                  | 3.14E-16             |
| 4064       | NF-kappa B signaling pathway                 | 17                  | 1.26E-14             |
| 4062       | Chemokine signaling pathway                  | 19                  | 1.33E-11             |
| 4660       | T cell receptor signaling pathway            | 15                  | 1.92E-11             |
| 5169       | Epstein-Barr virus infection                 | 18                  | 2.92E-10             |
| 5166       | HTLV-I infection                             | 20                  | 4.24E-10             |
| 4640       | Hematopoietic cell lineage                   | 13                  | 4.93E-10             |
| 5162       | Measles                                      | 15                  | 6.89E-10             |
| 4514       | Cell adhesion molecules (CAMs)               | 15                  | 1.35E-09             |
| 4672       | Intestinal immune network for IgA production | 9                   | 3.57E-08             |
| 5168       | Herpes simplex infection                     | 15                  | 3.74E-08             |
| 4612       | Antigen processing and presentation          | 10                  | 7.60E-08             |
| 5330       | Allograft rejection                          | 8                   | 7.60E-08             |
| 4662       | B cell receptor signaling pathway            | 10                  | 1.11E-07             |
| 5416       | Viral myocarditis                            | 9                   | 2.03E-07             |
| 5332       | Graft-versus-host disease                    | 7                   | 2.42E-06             |
| 4380       | Osteoclast differentiation                   | 11                  | 2.74E-06             |
| 4620       | Toll-like receptor signaling pathway         | 10                  | 3.65E-06             |
| 4940       | Type I diabetes mellitus                     | 7                   | 4.45E-06             |
| 4668       | TNF signaling pathway                        | 10                  | 5.24E-06             |
| 5144       | Malaria                                      | 7                   | 1.10E-05             |
| 5140       | Leishmaniasis                                | 8                   | 1.47E-05             |
| 5320       | Autoimmune thyroid disease                   | 7                   | 1.58E-05             |
| 4630       | Jak-STAT signaling pathway                   | 11                  | 1.91E-05             |
| 5164       | Influenza A                                  | 11                  | 3.82E-05             |
| 5323       | Rheumatoid arthritis                         | 8                   | 6.20E-05             |
| 4670       | Leukocyte transendothelial migration         | 9                   | 6.26E-05             |
| 5321       | Inflammatory bowel disease (IBD)             | 7                   | 6.64E-05             |
| 4144       | Endocytosis                                  | 11                  | 0.000133             |
| 5143       | African trypanosomiasis                      | 5                   | 0.000314             |
| 5142       | Chagas disease (American trypanosomiasis)    | 7                   | 0.00105              |
| 4145       | Phagosome                                    | 8                   | 0.00203              |
| 5203       | Viral carcinogenesis                         | 9                   | 0.00208              |
| 5145       | Toxoplasmosis                                | 7                   | 0.00251              |
| 5200       | Pathways in cancer                           | 12                  | 0.00271              |
| 4666       | Fc gamma R-mediated phagocytosis             | 6                   | 0.00379              |
| 5202       | Transcriptional misregulation in cancer      | 8                   | 0.00465              |
| 4623       | Cytosolic DNA-sensing pathway                | 5                   | 0.00485              |
| 5152       | Tuberculosis                                 | 8                   | 0.0056               |
| 4664       | Fc epsilon RI signaling pathway              | 5                   | 0.00662              |
| 3050       | Proteasome                                   | 4                   | 0.00984              |

|      |                                                            |   |        |
|------|------------------------------------------------------------|---|--------|
| 4722 | Neurotrophin signaling pathway                             | 6 | 0.014  |
| 4810 | Regulation of actin cytoskeleton                           | 8 | 0.0179 |
| 5222 | Small cell lung cancer                                     | 5 | 0.0179 |
| 5160 | Hepatitis C                                                | 6 | 0.0223 |
| 4621 | NOD-like receptor signaling pathway                        | 4 | 0.0234 |
| 4370 | VEGF signaling pathway                                     | 4 | 0.0276 |
| 5120 | Epithelial cell signaling in Helicobacter pylori infection | 4 | 0.0382 |
| 4920 | Adipocytokine signaling pathway                            | 4 | 0.0416 |
| 4622 | RIG-I-like receptor signaling pathway                      | 4 | 0.0452 |
| 4010 | MAPK signaling pathway                                     | 8 | 0.0471 |

---

**Table S2.3.** GO pathway enrichment in downregulated group of RA versus OA

| Pathway ID | Pathway description                                                                          | Observed<br>gene count | False discovery<br>rate |
|------------|----------------------------------------------------------------------------------------------|------------------------|-------------------------|
| GO.0048731 | System development                                                                           | 91                     | 8.90E-12                |
| GO.0007275 | Multicellular organismal development                                                         | 97                     | 3.68E-11                |
| GO.0044767 | Single-organism developmental process                                                        | 100                    | 2.74E-09                |
| GO.0048856 | Anatomical structure development                                                             | 91                     | 1.29E-08                |
| GO.0051239 | Regulation of multicellular organismal<br>process                                            | 63                     | 5.14E-08                |
| GO.0009653 | Anatomical structure morphogenesis                                                           | 58                     | 6.65E-08                |
| GO.0032501 | Multicellular organismal process                                                             | 109                    | 6.65E-08                |
| GO.0032502 | Developmental process                                                                        | 96                     | 6.65E-08                |
| GO.0060284 | Regulation of cell development                                                               | 33                     | 6.65E-08                |
| GO.0048513 | Organ development                                                                            | 67                     | 7.59E-08                |
| GO.0044707 | Single-multicellular organism process                                                        | 105                    | 1.30E-07                |
| GO.0040008 | Regulation of growth                                                                         | 29                     | 2.13E-07                |
| GO.0007399 | Nervous system development                                                                   | 54                     | 5.27E-07                |
| GO.0045597 | Positive regulation of cell differentiation                                                  | 32                     | 6.87E-07                |
| GO.0009888 | Tissue development                                                                           | 46                     | 8.63E-07                |
| GO.0030154 | Cell differentiation                                                                         | 70                     | 1.46E-06                |
| GO.0042063 | Gliogenesis                                                                                  | 15                     | 1.46E-06                |
| GO.0050793 | Regulation of developmental process                                                          | 54                     | 2.03E-06                |
| GO.0051128 | Regulation of cellular component<br>organization                                             | 55                     | 2.03E-06                |
| GO.0061061 | Muscle structure development                                                                 | 23                     | 2.45E-06                |
| GO.0048519 | Negative regulation of biological process                                                    | 85                     | 2.55E-06                |
| GO.0022008 | Neurogenesis                                                                                 | 42                     | 2.87E-06                |
| GO.0048869 | Cellular developmental process                                                               | 71                     | 3.20E-06                |
| GO.0007517 | Muscle organ development                                                                     | 18                     | 3.36E-06                |
| GO.0060537 | Muscle tissue development                                                                    | 18                     | 3.36E-06                |
| GO.2000026 | Regulation of multicellular organismal<br>development                                        | 44                     | 3.36E-06                |
| GO.0001558 | Regulation of cell growth                                                                    | 20                     | 3.68E-06                |
| GO.0030198 | Extracellular matrix organization                                                            | 20                     | 4.12E-06                |
| GO.0048589 | Developmental growth                                                                         | 19                     | 4.52E-06                |
| GO.0048732 | Gland development                                                                            | 21                     | 5.56E-06                |
| GO.0007155 | Cell adhesion                                                                                | 33                     | 6.06E-06                |
| GO.0040007 | Growth                                                                                       | 21                     | 6.25E-06                |
| GO.0042127 | Regulation of cell proliferation                                                             | 42                     | 6.70E-06                |
| GO.0048523 | Negative regulation of cellular process                                                      | 79                     | 6.70E-06                |
| GO.0014706 | Striated muscle tissue development                                                           | 17                     | 8.25E-06                |
| GO.0090092 | Regulation of transmembrane receptor<br>protein serine/threonine kinase signaling<br>pathway | 15                     | 1.01E-05                |
| GO.0072358 | Cardiovascular system development                                                            | 29                     | 1.08E-05                |
| GO.0072359 | Circulatory system development                                                               | 29                     | 1.08E-05                |

|            |                                                           |    |          |
|------------|-----------------------------------------------------------|----|----------|
| GO.0051241 | Negative regulation of multicellular organismal process   | 32 | 1.81E-05 |
| GO.0001655 | Urogenital system development                             | 17 | 2.13E-05 |
| GO.0032330 | Regulation of chondrocyte differentiation                 | 8  | 2.13E-05 |
| GO.0050767 | Regulation of neurogenesis                                | 24 | 2.13E-05 |
| GO.0051960 | Regulation of nervous system development                  | 26 | 2.13E-05 |
| GO.0010720 | Positive regulation of cell development                   | 21 | 2.39E-05 |
| GO.0065008 | Regulation of biological quality                          | 64 | 2.75E-05 |
| GO.0051093 | Negative regulation of developmental process              | 29 | 3.87E-05 |
| GO.0007417 | Central nervous system development                        | 29 | 4.10E-05 |
| GO.0045664 | Regulation of neuron differentiation                      | 21 | 4.38E-05 |
| GO.0048583 | Regulation of response to stimulus                        | 68 | 4.46E-05 |
| GO.0023051 | Regulation of signaling                                   | 59 | 4.89E-05 |
| GO.0007167 | Enzyme linked receptor protein signaling pathway          | 30 | 5.69E-05 |
| GO.0001822 | Kidney development                                        | 15 | 5.89E-05 |
| GO.0042221 | Response to chemical                                      | 73 | 6.49E-05 |
| GO.0001503 | Ossification                                              | 15 | 7.44E-05 |
| GO.0051094 | Positive regulation of developmental process              | 33 | 7.65E-05 |
| GO.0071363 | Cellular response to growth factor stimulus               | 24 | 7.97E-05 |
| GO.0070887 | Cellular response to chemical stimulus                    | 52 | 8.88E-05 |
| GO.0045595 | Regulation of cell differentiation                        | 39 | 9.36E-05 |
| GO.0072001 | Renal system development                                  | 15 | 9.85E-05 |
| GO.0010001 | Glial cell differentiation                                | 11 | 0.000104 |
| GO.0022603 | Regulation of anatomical structure morphogenesis          | 28 | 0.000123 |
| GO.0048468 | Cell development                                          | 41 | 0.000123 |
| GO.0010033 | Response to organic substance                             | 54 | 0.000137 |
| GO.0061037 | Negative regulation of cartilage development              | 6  | 0.000154 |
| GO.0090287 | Regulation of cellular response to growth factor stimulus | 14 | 0.000154 |
| GO.0051270 | Regulation of cellular component movement                 | 25 | 0.000155 |
| GO.0061448 | Connective tissue development                             | 13 | 0.000182 |
| GO.0010646 | Regulation of cell communication                          | 59 | 0.000203 |
| GO.0061035 | Regulation of cartilage development                       | 8  | 0.000209 |
| GO.0001501 | Skeletal system development                               | 19 | 0.000258 |
| GO.2000145 | Regulation of cell motility                               | 23 | 0.000258 |
| GO.0016477 | Cell migration                                            | 25 | 0.000306 |
| GO.0051962 | Positive regulation of nervous system development         | 18 | 0.000315 |
| GO.0072191 | Ureter smooth muscle development                          | 3  | 0.000319 |
| GO.0072193 | Ureter smooth muscle cell differentiation                 | 3  | 0.000319 |
| GO.0030334 | Regulation of cell migration                              | 22 | 0.000321 |
| GO.0001654 | Eye development                                           | 16 | 0.000323 |

|            |                                                         |     |          |
|------------|---------------------------------------------------------|-----|----------|
| GO.2000241 | Regulation of reproductive process                      | 9   | 0.000323 |
| GO.0042692 | Muscle cell differentiation                             | 14  | 0.000333 |
| GO.0048699 | Generation of neurons                                   | 35  | 0.000364 |
| GO.0043010 | Camera-type eye development                             | 15  | 0.000391 |
| GO.0001101 | Response to acid chemical                               | 15  | 0.000399 |
| GO.0048522 | Positive regulation of cellular process                 | 78  | 0.000399 |
| GO.0032331 | Negative regulation of chondrocyte differentiation      | 5   | 0.00042  |
| GO.0051240 | Positive regulation of multicellular organismal process | 35  | 0.000443 |
| GO.0001944 | Vasculature development                                 | 19  | 0.000459 |
| GO.0009966 | Regulation of signal transduction                       | 51  | 0.000523 |
| GO.0030510 | Regulation of BMP signaling pathway                     | 8   | 0.000561 |
| GO.0050678 | Regulation of epithelial cell proliferation             | 14  | 0.000623 |
| GO.0050769 | Positive regulation of neurogenesis                     | 16  | 0.000667 |
| GO.0048518 | Positive regulation of biological process               | 85  | 0.000858 |
| GO.0008285 | Negative regulation of cell proliferation               | 22  | 0.00089  |
| GO.0060429 | Epithelium development                                  | 28  | 0.000891 |
| GO.0045666 | Positive regulation of neuron differentiation           | 14  | 0.000951 |
| GO.0044597 | Daunorubicin metabolic process                          | 3   | 0.000986 |
| GO.0044598 | Doxorubicin metabolic process                           | 3   | 0.000986 |
| GO.0071310 | Cellular response to organic substance                  | 42  | 0.000986 |
| GO.0000904 | Cell morphogenesis involved in differentiation          | 22  | 0.001    |
| GO.0051674 | Localization of cell                                    | 25  | 0.00102  |
| GO.0007050 | Cell cycle arrest                                       | 10  | 0.00103  |
| GO.0007166 | Cell surface receptor signaling pathway                 | 45  | 0.00103  |
| GO.0048598 | Embryonic morphogenesis                                 | 20  | 0.00109  |
| GO.2000736 | Regulation of stem cell differentiation                 | 9   | 0.00109  |
| GO.0032268 | Regulation of cellular protein metabolic process        | 48  | 0.00111  |
| GO.0001932 | Regulation of protein phosphorylation                   | 31  | 0.00121  |
| GO.0051146 | Striated muscle cell differentiation                    | 11  | 0.00121  |
| GO.0051271 | Negative regulation of cellular component movement      | 12  | 0.00127  |
| GO.0006629 | Lipid metabolic process                                 | 29  | 0.00128  |
| GO.0048705 | Skeletal system morphogenesis                           | 12  | 0.00131  |
| GO.0033993 | Response to lipid                                       | 24  | 0.00134  |
| GO.0040011 | Locomotion                                              | 31  | 0.00134  |
| GO.0042592 | Homeostatic process                                     | 33  | 0.00138  |
| GO.0001657 | Ureteric bud development                                | 8   | 0.00145  |
| GO.0006928 | Movement of cell or subcellular component               | 33  | 0.00154  |
| GO.0050794 | Regulation of cellular process                          | 130 | 0.0016   |
| GO.0032989 | Cellular component morphogenesis                        | 28  | 0.00162  |
| GO.0035272 | Exocrine system development                             | 6   | 0.00168  |
| GO.0007154 | Cell communication                                      | 84  | 0.00179  |
| GO.0040012 | Regulation of locomotion                                | 22  | 0.00179  |



|            |                                                                |     |         |
|------------|----------------------------------------------------------------|-----|---------|
| GO.0051216 | Cartilage development                                          | 10  | 0.00179 |
| GO.0001823 | Mesonephros development                                        | 8   | 0.00186 |
| GO.0009719 | Response to endogenous stimulus                                | 34  | 0.00188 |
| GO.0030336 | Negative regulation of cell migration                          | 11  | 0.00188 |
| GO.0035270 | Endocrine system development                                   | 9   | 0.00188 |
| GO.0065009 | Regulation of molecular function                               | 53  | 0.00188 |
| GO.0007507 | Heart development                                              | 17  | 0.00193 |
| GO.0023057 | Negative regulation of signaling                               | 30  | 0.00207 |
| GO.0009887 | Organ morphogenesis                                            | 25  | 0.00214 |
| GO.0032879 | Regulation of localization                                     | 47  | 0.00214 |
| GO.0007423 | Sensory organ development                                      | 18  | 0.00221 |
| GO.0009968 | Negative regulation of signal transduction                     | 28  | 0.00226 |
| GO.0051246 | Regulation of protein metabolic process                        | 49  | 0.00226 |
| GO.0010648 | Negative regulation of cell communication                      | 30  | 0.00231 |
| GO.0045596 | Negative regulation of cell differentiation                    | 21  | 0.00231 |
| GO.0061036 | Positive regulation of cartilage development                   | 5   | 0.00236 |
| GO.0000902 | Cell morphogenesis                                             | 26  | 0.00238 |
| GO.2000738 | Positive regulation of stem cell differentiation               | 6   | 0.00238 |
| GO.1901343 | Negative regulation of vasculature development                 | 7   | 0.00263 |
| GO.0048585 | Negative regulation of response to stimulus                    | 32  | 0.00267 |
| GO.0051726 | Regulation of cell cycle                                       | 26  | 0.00271 |
| GO.0016202 | Regulation of striated muscle tissue development               | 8   | 0.00287 |
| GO.0051336 | Regulation of hydrolase activity                               | 31  | 0.00296 |
| GO.0048553 | Negative regulation of metalloenzyme activity                  | 3   | 0.0031  |
| GO.0051045 | Negative regulation of membrane protein ectodomain proteolysis | 3   | 0.0031  |
| GO.1901700 | Response to oxygen-containing compound                         | 32  | 0.0031  |
| GO.0050789 | Regulation of biological process                               | 132 | 0.00312 |
| GO.0042325 | Regulation of phosphorylation                                  | 31  | 0.00324 |
| GO.0022604 | Regulation of cell morphogenesis                               | 17  | 0.00335 |
| GO.0051716 | Cellular response to stimulus                                  | 93  | 0.00335 |
| GO.0050896 | Response to stimulus                                           | 104 | 0.00368 |
| GO.0022612 | Gland morphogenesis                                            | 8   | 0.00378 |
| GO.1901342 | Regulation of vasculature development                          | 11  | 0.00378 |
| GO.0060065 | Uterus development                                             | 4   | 0.00385 |
| GO.0060560 | Developmental growth involved in morphogenesis                 | 8   | 0.004   |
| GO.0009605 | Response to external stimulus                                  | 40  | 0.0041  |
| GO.0010721 | Negative regulation of cell development                        | 12  | 0.0041  |
| GO.0044255 | Cellular lipid metabolic process                               | 23  | 0.00416 |
| GO.0001656 | Metanephros development                                        | 7   | 0.00419 |
| GO.0032332 | Positive regulation of chondrocyte differentiation             | 4   | 0.00472 |

|            |                                                                                                 |     |         |
|------------|-------------------------------------------------------------------------------------------------|-----|---------|
| GO.0032808 | Lacrimal gland development                                                                      | 3   | 0.00491 |
| GO.0052547 | Regulation of peptidase activity                                                                | 15  | 0.00492 |
| GO.1902533 | Positive regulation of intracellular signal transduction                                        | 23  | 0.00504 |
| GO.0048738 | Cardiac muscle tissue development                                                               | 9   | 0.00533 |
| GO.0051098 | Regulation of binding                                                                           | 12  | 0.00533 |
| GO.0016049 | Cell growth                                                                                     | 8   | 0.00552 |
| GO.0050680 | Negative regulation of epithelial cell proliferation                                            | 8   | 0.00552 |
| GO.0023056 | Positive regulation of signaling                                                                | 33  | 0.00565 |
| GO.0045786 | Negative regulation of cell cycle                                                               | 16  | 0.00569 |
| GO.0044700 | Single organism signaling                                                                       | 80  | 0.00577 |
| GO.0055123 | Digestive system development                                                                    | 9   | 0.00577 |
| GO.0010632 | Regulation of epithelial cell migration                                                         | 9   | 0.00599 |
| GO.0001568 | Blood vessel development                                                                        | 16  | 0.00601 |
| GO.0042327 | Positive regulation of phosphorylation                                                          | 23  | 0.00619 |
| GO.0009790 | Embryo development                                                                              | 25  | 0.00649 |
| GO.0034308 | Primary alcohol metabolic process                                                               | 5   | 0.00697 |
| GO.0045937 | Positive regulation of phosphate metabolic process                                              | 25  | 0.00698 |
| GO.0048709 | Oligodendrocyte differentiation                                                                 | 6   | 0.00721 |
| GO.0044092 | Negative regulation of molecular function                                                       | 27  | 0.00735 |
| GO.0051248 | Negative regulation of protein metabolic process                                                | 26  | 0.00767 |
| GO.2000242 | Negative regulation of reproductive process                                                     | 5   | 0.00767 |
| GO.0048771 | Tissue remodeling                                                                               | 7   | 0.00782 |
| GO.0007519 | Skeletal muscle tissue development                                                              | 8   | 0.00809 |
| GO.0045765 | Regulation of angiogenesis                                                                      | 10  | 0.00809 |
| GO.0035282 | Segmentation                                                                                    | 7   | 0.00822 |
| GO.0008284 | Positive regulation of cell proliferation                                                       | 22  | 0.00851 |
| GO.0001934 | Positive regulation of protein phosphorylation                                                  | 22  | 0.00863 |
| GO.0010634 | Positive regulation of epithelial cell migration                                                | 7   | 0.00868 |
| GO.0010717 | Regulation of epithelial to mesenchymal transition                                              | 6   | 0.00888 |
| GO.0001502 | Cartilage condensation                                                                          | 4   | 0.00895 |
| GO.0032270 | Positive regulation of cellular protein metabolic process                                       | 30  | 0.00895 |
| GO.0035295 | Tube development                                                                                | 18  | 0.00895 |
| GO.0043567 | Regulation of insulin-like growth factor receptor signaling pathway                             | 4   | 0.00895 |
| GO.0052548 | Regulation of endopeptidase activity                                                            | 14  | 0.00895 |
| GO.0065007 | Biological regulation                                                                           | 133 | 0.00895 |
| GO.0090100 | Positive regulation of transmembrane receptor protein serine/threonine kinase signaling pathway | 7   | 0.00895 |

|            |                                                                  |    |         |
|------------|------------------------------------------------------------------|----|---------|
| GO.0030850 | Prostate gland development                                       | 5  | 0.00896 |
| GO.0010975 | Regulation of neuron projection development                      | 13 | 0.00929 |
| GO.0033689 | Negative regulation of osteoblast proliferation                  | 3  | 0.00929 |
| GO.0009967 | Positive regulation of signal transduction                       | 30 | 0.0094  |
| GO.0048584 | Positive regulation of response to stimulus                      | 39 | 0.00942 |
| GO.0006714 | Sesquiterpenoid metabolic process                                | 2  | 0.00949 |
| GO.0043627 | Response to estrogen                                             | 10 | 0.00949 |
| GO.0007169 | Transmembrane receptor protein tyrosine kinase signaling pathway | 20 | 0.00956 |
| GO.0022414 | Reproductive process                                             | 28 | 0.00967 |
| GO.0016525 | Negative regulation of angiogenesis                              | 6  | 0.00968 |
| GO.0019220 | Regulation of phosphate metabolic process                        | 33 | 0.00999 |
| GO.0072073 | Kidney epithelium development                                    | 8  | 0.00999 |
| GO.2000826 | Regulation of heart morphogenesis                                | 4  | 0.00999 |
| GO.0044711 | Single-organism biosynthetic process                             | 30 | 0.0107  |
| GO.0007173 | Epidermal growth factor receptor signaling pathway               | 10 | 0.0108  |
| GO.0048706 | Embryonic skeletal system development                            | 8  | 0.011   |
| GO.0031399 | Regulation of protein modification process                       | 34 | 0.0113  |
| GO.0071709 | Membrane assembly                                                | 4  | 0.0115  |
| GO.0035265 | Organ growth                                                     | 6  | 0.0118  |
| GO.0051247 | Positive regulation of protein metabolic process                 | 31 | 0.0118  |
| GO.0007548 | Sex differentiation                                              | 11 | 0.0119  |
| GO.0008354 | Germ cell migration                                              | 3  | 0.0119  |
| GO.0048568 | Embryonic organ development                                      | 15 | 0.0119  |
| GO.0060538 | Skeletal muscle organ development                                | 8  | 0.0123  |
| GO.0071495 | Cellular response to endogenous stimulus                         | 25 | 0.0129  |
| GO.0060740 | Prostate gland epithelium morphogenesis                          | 4  | 0.013   |
| GO.0030278 | Regulation of ossification                                       | 9  | 0.0138  |
| GO.0032269 | Negative regulation of cellular protein metabolic process        | 24 | 0.0139  |
| GO.2000147 | Positive regulation of cell motility                             | 13 | 0.014   |
| GO.0003007 | Heart morphogenesis                                              | 10 | 0.0148  |
| GO.0001658 | Branching involved in ureteric bud morphogenesis                 | 5  | 0.0149  |
| GO.0044272 | Sulfur compound biosynthetic process                             | 9  | 0.0149  |
| GO.0032970 | Regulation of actin filament-based process                       | 12 | 0.0154  |
| GO.0008283 | Cell proliferation                                               | 19 | 0.0157  |
| GO.0048545 | Response to steroid hormone                                      | 14 | 0.0157  |
| GO.0045667 | Regulation of osteoblast differentiation                         | 7  | 0.016   |
| GO.0016101 | Diterpenoid metabolic process                                    | 6  | 0.0172  |
| GO.0048871 | Multicellular organismal homeostasis                             | 11 | 0.0174  |
| GO.0031401 | Positive regulation of protein modification process              | 25 | 0.0175  |

|            |                                                                                                 |     |        |
|------------|-------------------------------------------------------------------------------------------------|-----|--------|
| GO.0035239 | Tube morphogenesis                                                                              | 13  | 0.0178 |
| GO.0046824 | Positive regulation of nucleocytoplasmic transport                                              | 7   | 0.0186 |
| GO.0010604 | Positive regulation of macromolecule metabolic process                                          | 48  | 0.0189 |
| GO.0031128 | Developmental induction                                                                         | 4   | 0.0189 |
| GO.0060512 | Prostate gland morphogenesis                                                                    | 4   | 0.0189 |
| GO.0010647 | Positive regulation of cell communication                                                       | 33  | 0.019  |
| GO.0072044 | Collecting duct development                                                                     | 3   | 0.0193 |
| GO.0090101 | Negative regulation of transmembrane receptor protein serine/threonine kinase signaling pathway | 7   | 0.0193 |
| GO.0048729 | Tissue morphogenesis                                                                            | 17  | 0.0202 |
| GO.0055002 | Striated muscle cell development                                                                | 7   | 0.0202 |
| GO.0072006 | Nephron development                                                                             | 7   | 0.0202 |
| GO.0043410 | Positive regulation of MAPK cascade                                                             | 14  | 0.0204 |
| GO.0044091 | Membrane biogenesis                                                                             | 4   | 0.0209 |
| GO.0044344 | Cellular response to fibroblast growth factor stimulus                                          | 9   | 0.0212 |
| GO.0048638 | Regulation of developmental growth                                                              | 11  | 0.0212 |
| GO.0050679 | Positive regulation of epithelial cell proliferation                                            | 8   | 0.0213 |
| GO.0051179 | Localization                                                                                    | 69  | 0.0213 |
| GO.0010035 | Response to inorganic substance                                                                 | 14  | 0.0215 |
| GO.0019448 | L-cysteine catabolic process                                                                    | 2   | 0.0215 |
| GO.0030162 | Regulation of proteolysis                                                                       | 20  | 0.0215 |
| GO.0044057 | Regulation of system process                                                                    | 14  | 0.0215 |
| GO.0045726 | Positive regulation of integrin biosynthetic process                                            | 2   | 0.0215 |
| GO.0046903 | Secretion                                                                                       | 17  | 0.0215 |
| GO.0048660 | Regulation of smooth muscle cell proliferation                                                  | 6   | 0.0215 |
| GO.0060322 | Head development                                                                                | 19  | 0.0215 |
| GO.0060395 | SMAD protein signal transduction                                                                | 5   | 0.0215 |
| GO.0072190 | Ureter urothelium development                                                                   | 2   | 0.0215 |
| GO.0072197 | Ureter morphogenesis                                                                            | 2   | 0.0215 |
| GO.0043523 | Regulation of neuron apoptotic process                                                          | 9   | 0.0217 |
| GO.0014068 | Positive regulation of phosphatidylinositol 3-kinase signaling                                  | 5   | 0.022  |
| GO.0044763 | Single-organism cellular process                                                                | 134 | 0.022  |
| GO.0048546 | Digestive tract morphogenesis                                                                   | 5   | 0.022  |
| GO.0060038 | Cardiac muscle cell proliferation                                                               | 3   | 0.022  |
| GO.0060442 | Branching involved in prostate gland morphogenesis                                              | 3   | 0.022  |
| GO.0060675 | Ureteric bud morphogenesis                                                                      | 5   | 0.022  |
| GO.0060766 | Negative regulation of androgen receptor signaling pathway                                      | 3   | 0.022  |

|            |                                                             |    |        |
|------------|-------------------------------------------------------------|----|--------|
| GO.0051896 | Regulation of protein kinase B signaling                    | 7  | 0.0235 |
| GO.0010951 | Negative regulation of endopeptidase activity               | 10 | 0.0239 |
| GO.1901214 | Regulation of neuron death                                  | 10 | 0.0239 |
| GO.0006790 | Sulfur compound metabolic process                           | 12 | 0.0241 |
| GO.0043393 | Regulation of protein binding                               | 8  | 0.0241 |
| GO.0048514 | Blood vessel morphogenesis                                  | 13 | 0.0242 |
| GO.1901615 | Organic hydroxy compound metabolic process                  | 15 | 0.0253 |
| GO.0010718 | Positive regulation of epithelial to mesenchymal transition | 4  | 0.0271 |
| GO.0051493 | Regulation of cytoskeleton organization                     | 13 | 0.0272 |
| GO.0043408 | Regulation of MAPK cascade                                  | 17 | 0.0273 |
| GO.0038179 | Neurotrophin signaling pathway                              | 11 | 0.0284 |
| GO.0048562 | Embryonic organ morphogenesis                               | 11 | 0.0291 |
| GO.0060548 | Negative regulation of cell death                           | 22 | 0.0293 |
| GO.0030335 | Positive regulation of cell migration                       | 12 | 0.0298 |
| GO.0031344 | Regulation of cell projection organization                  | 14 | 0.0301 |
| GO.0044089 | Positive regulation of cellular component biogenesis        | 12 | 0.0304 |
| GO.0060350 | Endochondral bone morphogenesis                             | 5  | 0.0309 |
| GO.0030182 | Neuron differentiation                                      | 23 | 0.0314 |
| GO.0007165 | Signal transduction                                         | 72 | 0.0316 |
| GO.0030277 | Maintenance of gastrointestinal epithelium                  | 3  | 0.0316 |
| GO.0030855 | Epithelial cell differentiation                             | 15 | 0.0317 |
| GO.0060348 | Bone development                                            | 8  | 0.0317 |
| GO.0030879 | Mammary gland development                                   | 7  | 0.0323 |
| GO.0032355 | Response to estradiol                                       | 7  | 0.0323 |
| GO.0044281 | Small molecule metabolic process                            | 40 | 0.0325 |
| GO.0030203 | Glycosaminoglycan metabolic process                         | 8  | 0.0326 |
| GO.0030111 | Regulation of Wnt signaling pathway                         | 11 | 0.0328 |
| GO.0009991 | Response to extracellular stimulus                          | 14 | 0.0329 |
| GO.0007568 | Aging                                                       | 10 | 0.0332 |
| GO.0045861 | Negative regulation of proteolysis                          | 12 | 0.0332 |
| GO.0006066 | Alcohol metabolic process                                   | 12 | 0.0338 |
| GO.0001974 | Blood vessel remodeling                                     | 4  | 0.0347 |
| GO.0008543 | Fibroblast growth factor receptor signaling pathway         | 8  | 0.0347 |
| GO.0032956 | Regulation of actin cytoskeleton organization               | 10 | 0.0347 |
| GO.0042307 | Positive regulation of protein import into nucleus          | 6  | 0.0347 |
| GO.0044848 | Biological phase                                            | 2  | 0.0347 |
| GO.0048646 | Anatomical structure formation involved in morphogenesis    | 23 | 0.0347 |
| GO.0060283 | Negative regulation of oocyte development                   | 2  | 0.0347 |
| GO.0060428 | Lung epithelium development                                 | 4  | 0.0347 |

|            |                                                                             |    |        |
|------------|-----------------------------------------------------------------------------|----|--------|
| GO.0060686 | Negative regulation of prostatic bud formation                              | 2  | 0.0347 |
| GO.0061551 | Trigeminal ganglion development                                             | 2  | 0.0347 |
| GO.0072095 | Regulation of branch elongation involved in ureteric bud branching          | 2  | 0.0347 |
| GO.0072199 | Regulation of mesenchymal cell proliferation involved in ureter development | 2  | 0.0347 |
| GO.0090191 | Negative regulation of branching involved in ureteric bud morphogenesis     | 2  | 0.0347 |
| GO.0097118 | Neurologin clustering involved in postsynaptic membrane assembly            | 2  | 0.0347 |
| GO.1902531 | Regulation of intracellular signal transduction                             | 29 | 0.0347 |
| GO.0009725 | Response to hormone                                                         | 21 | 0.0352 |
| GO.2000136 | Regulation of cell proliferation involved in heart morphogenesis            | 3  | 0.0353 |
| GO.0051145 | Smooth muscle cell differentiation                                          | 4  | 0.0367 |
| GO.0051496 | Positive regulation of stress fiber assembly                                | 4  | 0.0367 |
| GO.0001894 | Tissue homeostasis                                                          | 8  | 0.0396 |
| GO.0032844 | Regulation of homeostatic process                                           | 12 | 0.0397 |
| GO.0002088 | Lens development in camera-type eye                                         | 5  | 0.0398 |
| GO.0007010 | Cytoskeleton organization                                                   | 20 | 0.04   |
| GO.0045668 | Negative regulation of osteoblast differentiation                           | 4  | 0.04   |
| GO.0048704 | Embryonic skeletal system morphogenesis                                     | 6  | 0.04   |
| GO.0090288 | Negative regulation of cellular response to growth factor stimulus          | 7  | 0.0403 |
| GO.0001759 | Organ induction                                                             | 3  | 0.0406 |
| GO.0010941 | Regulation of cell death                                                    | 30 | 0.0406 |
| GO.0014812 | Muscle cell migration                                                       | 3  | 0.0406 |
| GO.0060541 | Respiratory system development                                              | 9  | 0.0406 |
| GO.1901135 | Carbohydrate derivative metabolic process                                   | 23 | 0.0407 |
| GO.0048608 | Reproductive structure development                                          | 13 | 0.0413 |
| GO.0010464 | Regulation of mesenchymal cell proliferation                                | 4  | 0.0432 |
| GO.0030500 | Regulation of bone mineralization                                           | 5  | 0.0443 |
| GO.0061458 | Reproductive system development                                             | 13 | 0.0449 |
| GO.0044087 | Regulation of cellular component biogenesis                                 | 17 | 0.045  |
| GO.0045926 | Negative regulation of growth                                               | 9  | 0.0455 |
| GO.0061138 | Morphogenesis of a branching epithelium                                     | 8  | 0.0455 |
| GO.0051130 | Positive regulation of cellular component organization                      | 25 | 0.0461 |
| GO.0007389 | Pattern specification process                                               | 13 | 0.0469 |
| GO.0021987 | Cerebral cortex development                                                 | 6  | 0.0469 |
| GO.0030903 | Notochord development                                                       | 3  | 0.0469 |
| GO.0045598 | Regulation of fat cell differentiation                                      | 6  | 0.0469 |

|            |                                         |    |        |
|------------|-----------------------------------------|----|--------|
| GO.0050790 | Regulation of catalytic activity        | 40 | 0.0469 |
| GO.0048565 | Digestive tract development             | 7  | 0.0475 |
| GO.0097305 | Response to alcohol                     | 11 | 0.0475 |
| GO.0042698 | Ovulation cycle                         | 6  | 0.049  |
| GO.0048015 | Phosphatidylinositol-mediated signaling | 7  | 0.0492 |
| GO.0048592 | Eye morphogenesis                       | 7  | 0.0492 |

---

**Table S2.4.** KEGG pathway enrichment in downregulated group of RA versus OA

| Pathway ID | Pathway description                     | Observed gene count | False discovery rate |
|------------|-----------------------------------------|---------------------|----------------------|
| 561        | Glycerolipid metabolism                 | 6                   | 0.0142               |
| 5202       | Transcriptional misregulation in cancer | 9                   | 0.0276               |



**Table S3.** GO and KEGG enrichment pathways in RA versus normalcy and OA versus normalcy.

**Table S3.1.** GO pathway enrichment in upregulated group of RA versus normalcy

| Pathway ID | Pathway description                            | Observed gene count | False discovery rate |
|------------|------------------------------------------------|---------------------|----------------------|
| GO.0006955 | Immune response                                | 112                 | 1.57E-44             |
| GO.0002376 | Immune system process                          | 130                 | 8.05E-41             |
| GO.0006952 | Defense response                               | 92                  | 1.18E-26             |
| GO.0007166 | Cell surface receptor signaling pathway        | 109                 | 5.62E-25             |
| GO.0006950 | Response to stress                             | 141                 | 2.38E-23             |
| GO.0050776 | Regulation of immune response                  | 63                  | 4.92E-21             |
| GO.0002252 | Immune effector process                        | 47                  | 9.51E-21             |
| GO.0050896 | Response to stimulus                           | 205                 | 2.57E-20             |
| GO.0002682 | Regulation of immune system process            | 80                  | 4.00E-20             |
| GO.0050778 | Positive regulation of immune response         | 51                  | 1.32E-19             |
| GO.0002684 | Positive regulation of immune system process   | 61                  | 2.22E-19             |
| GO.0045087 | Innate immune response                         | 65                  | 2.52E-19             |
| GO.0007165 | Signal transduction                            | 157                 | 1.62E-18             |
| GO.0023052 | Signaling                                      | 162                 | 6.57E-18             |
| GO.0051716 | Cellular response to stimulus                  | 181                 | 7.71E-18             |
| GO.0019221 | Cytokine-mediated signaling pathway            | 41                  | 8.79E-18             |
| GO.0044700 | Single organism signaling                      | 161                 | 1.41E-17             |
| GO.0034097 | Response to cytokine                           | 51                  | 2.08E-17             |
| GO.0007154 | Cell communication                             | 162                 | 4.74E-17             |
| GO.0071345 | Cellular response to cytokine stimulus         | 46                  | 8.56E-17             |
| GO.0009607 | Response to biotic stimulus                    | 51                  | 1.75E-15             |
| GO.0002757 | Immune response-activating signal transduction | 38                  | 1.85E-15             |
| GO.0048584 | Positive regulation of response to stimulus    | 86                  | 6.60E-15             |
| GO.0051707 | Response to other organism                     | 49                  | 6.60E-15             |
| GO.0031347 | Regulation of defense response                 | 51                  | 8.78E-15             |
| GO.0002253 | Activation of immune response                  | 39                  | 1.20E-14             |
| GO.0010033 | Response to organic substance                  | 99                  | 2.08E-14             |
| GO.0048583 | Regulation of response to stimulus             | 119                 | 2.16E-14             |
| GO.0031349 | Positive regulation of defense response        | 36                  | 3.64E-14             |
| GO.0009605 | Response to external stimulus                  | 83                  | 7.21E-14             |
| GO.0051704 | Multi-organism process                         | 90                  | 4.22E-13             |
| GO.0035556 | Intracellular signal transduction              | 79                  | 1.79E-12             |
| GO.0002764 | Immune response-regulating signaling pathway   | 38                  | 2.06E-12             |
| GO.0009615 | Response to virus                              | 27                  | 2.96E-12             |
| GO.0070887 | Cellular response to chemical stimulus         | 89                  | 7.57E-12             |
| GO.0050865 | Regulation of cell activation                  | 35                  | 8.82E-12             |

|            |                                                                    |     |          |
|------------|--------------------------------------------------------------------|-----|----------|
| GO.0002429 | Immune response-activating cell surface receptor signaling pathway | 28  | 1.94E-11 |
| GO.0045088 | Regulation of innate immune response                               | 32  | 1.94E-11 |
| GO.0048518 | Positive regulation of biological process                          | 146 | 2.27E-11 |
| GO.0001817 | Regulation of cytokine production                                  | 38  | 2.29E-11 |
| GO.0071310 | Cellular response to organic substance                             | 77  | 2.32E-11 |
| GO.0002694 | Regulation of leukocyte activation                                 | 33  | 2.51E-11 |
| GO.0050867 | Positive regulation of cell activation                             | 27  | 2.77E-11 |
| GO.0046649 | Lymphocyte activation                                              | 30  | 3.38E-11 |
| GO.0080134 | Regulation of response to stress                                   | 65  | 4.18E-11 |
| GO.0048519 | Negative regulation of biological process                          | 129 | 8.49E-11 |
| GO.0048522 | Positive regulation of cellular process                            | 131 | 9.81E-11 |
| GO.0042221 | Response to chemical                                               | 118 | 1.32E-10 |
| GO.0002696 | Positive regulation of leukocyte activation                        | 25  | 5.01E-10 |
| GO.0030595 | Leukocyte chemotaxis                                               | 17  | 5.32E-10 |
| GO.0006915 | Apoptotic process                                                  | 53  | 7.74E-10 |
| GO.0006954 | Inflammatory response                                              | 32  | 1.06E-09 |
| GO.0012501 | Programmed cell death                                              | 53  | 1.06E-09 |
| GO.0008219 | Cell death                                                         | 54  | 1.21E-09 |
| GO.0098542 | Defense response to other organism                                 | 29  | 1.37E-09 |
| GO.0048523 | Negative regulation of cellular process                            | 119 | 1.43E-09 |
| GO.0050900 | Leukocyte migration                                                | 24  | 1.64E-09 |
| GO.0045089 | Positive regulation of innate immune response                      | 26  | 1.92E-09 |
| GO.0065009 | Regulation of molecular function                                   | 92  | 1.99E-09 |
| GO.0051249 | Regulation of lymphocyte activation                                | 28  | 2.09E-09 |
| GO.0060326 | Cell chemotaxis                                                    | 20  | 2.73E-09 |
| GO.0001819 | Positive regulation of cytokine production                         | 28  | 7.38E-09 |
| GO.0002768 | Immune response-regulating cell surface receptor signaling pathway | 29  | 7.38E-09 |
| GO.0044093 | Positive regulation of molecular function                          | 67  | 7.62E-09 |
| GO.0051607 | Defense response to virus                                          | 19  | 1.05E-08 |
| GO.0045321 | Leukocyte activation                                               | 29  | 1.28E-08 |
| GO.0051251 | Positive regulation of lymphocyte activation                       | 22  | 1.29E-08 |
| GO.0009966 | Regulation of signal transduction                                  | 83  | 1.55E-08 |
| GO.0002697 | Regulation of immune effector process                              | 29  | 1.69E-08 |
| GO.0009967 | Positive regulation of signal transduction                         | 56  | 2.30E-08 |
| GO.0050790 | Regulation of catalytic activity                                   | 78  | 2.66E-08 |
| GO.0072676 | Lymphocyte migration                                               | 10  | 3.45E-08 |
| GO.0050794 | Regulation of cellular process                                     | 206 | 6.03E-08 |
| GO.0065008 | Regulation of biological quality                                   | 94  | 9.59E-08 |
| GO.0065007 | Biological regulation                                              | 216 | 1.11E-07 |
| GO.0023056 | Positive regulation of signaling                                   | 58  | 1.15E-07 |
| GO.0050878 | Regulation of body fluid levels                                    | 37  | 1.18E-07 |
| GO.0009893 | Positive regulation of metabolic process                           | 104 | 1.23E-07 |

|            |                                                                                                                           |     |          |
|------------|---------------------------------------------------------------------------------------------------------------------------|-----|----------|
| GO.0023051 | Regulation of signaling                                                                                                   | 87  | 1.60E-07 |
| GO.0007159 | Leukocyte cell-cell adhesion                                                                                              | 22  | 2.43E-07 |
| GO.0030155 | Regulation of cell adhesion                                                                                               | 33  | 2.85E-07 |
| GO.0050789 | Regulation of biological process                                                                                          | 209 | 2.86E-07 |
|            | Antigen receptor-mediated signaling pathway                                                                               | 15  | 2.94E-07 |
| GO.0050851 | Response to bacterium                                                                                                     | 29  | 3.61E-07 |
| GO.0009617 | Regulation of hydrolase activity                                                                                          | 52  | 3.81E-07 |
| GO.0051336 | Type i interferon signaling pathway                                                                                       | 12  | 4.14E-07 |
| GO.0060337 | Cellular response to type i interferon                                                                                    | 12  | 4.14E-07 |
| GO.0071357 | Adaptive immune response                                                                                                  | 17  | 4.68E-07 |
| GO.0002250 | Activation of innate immune response                                                                                      | 21  | 4.87E-07 |
| GO.0002218 | Positive regulation of cell adhesion                                                                                      | 24  | 9.09E-07 |
| GO.0045785 | Regulation of leukocyte differentiation                                                                                   | 20  | 9.91E-07 |
| GO.1902105 | Hemostasis                                                                                                                | 31  | 1.01E-06 |
| GO.0007599 | Mitotic cell cycle process                                                                                                | 37  | 1.01E-06 |
|            | Positive regulation of cellular metabolic process                                                                         | 87  | 1.04E-06 |
| GO.0031325 | Positive regulation of catalytic activity                                                                                 | 55  | 1.08E-06 |
| GO.0043085 | Positive regulation of macromolecule metabolic process                                                                    | 83  | 1.14E-06 |
| GO.0010604 | Enzyme linked receptor protein signaling pathway                                                                          | 42  | 1.17E-06 |
| GO.0007167 | Response to interferon-gamma                                                                                              | 14  | 1.17E-06 |
| GO.0034341 | Innate immune response-activating signal transduction                                                                     | 20  | 1.53E-06 |
| GO.0002758 | Regulation of cell communication                                                                                          | 87  | 1.53E-06 |
| GO.0010646 | Mitotic cell cycle                                                                                                        | 39  | 1.67E-06 |
| GO.0000278 | Regulation of proteolysis                                                                                                 | 37  | 1.67E-06 |
| GO.0030162 | Positive regulation of hydrolase activity                                                                                 | 39  | 1.67E-06 |
| GO.0051345 | Cell activation                                                                                                           | 33  | 1.90E-06 |
| GO.0001775 | Positive regulation of cell communication                                                                                 | 58  | 1.95E-06 |
| GO.0010647 | Transmembrane receptor protein tyrosine kinase signaling pathway                                                          | 35  | 2.08E-06 |
| GO.0007169 | Hematopoietic or lymphoid organ development                                                                               | 31  | 2.16E-06 |
| GO.0048534 | Adaptive immune response based on somatic recombination of immune receptors built from immunoglobulin superfamily domains | 14  | 2.18E-06 |
| GO.0002460 | Lymphocyte aggregation                                                                                                    | 19  | 2.18E-06 |
| GO.0071593 | Lymphocyte chemotaxis                                                                                                     | 7   | 2.27E-06 |
| GO.0048247 | Lymphocyte differentiation                                                                                                | 18  | 2.34E-06 |
| GO.0030098 | Interferon-gamma-mediated signaling pathway                                                                               | 11  | 2.34E-06 |
| GO.0060333 | Response to lipopolysaccharide                                                                                            | 21  | 2.44E-06 |
| GO.0032496 |                                                                                                                           |     |          |

|            |                                                                                            |    |          |
|------------|--------------------------------------------------------------------------------------------|----|----------|
| GO.2000116 | Regulation of cysteine-type endopeptidase activity                                         | 19 | 2.44E-06 |
| GO.0022409 | Positive regulation of cell-cell adhesion                                                  | 18 | 2.47E-06 |
| GO.0007596 | Blood coagulation                                                                          | 30 | 2.50E-06 |
| GO.1903557 | Positive regulation of tumor necrosis factor superfamily cytokine production               | 10 | 2.50E-06 |
| GO.2000406 | Positive regulation of t cell migration                                                    | 7  | 3.25E-06 |
| GO.0033993 | Response to lipid                                                                          | 37 | 3.38E-06 |
| GO.0002703 | Regulation of leukocyte mediated immunity                                                  | 15 | 3.44E-06 |
| GO.0016477 | Cell migration                                                                             | 36 | 3.46E-06 |
| GO.0002521 | Leukocyte differentiation                                                                  | 21 | 4.30E-06 |
| GO.0097296 | Activation of cysteine-type endopeptidase activity involved in apoptotic signaling pathway | 7  | 4.69E-06 |
| GO.0002520 | Immune system development                                                                  | 31 | 4.82E-06 |
| GO.0070098 | Chemokine-mediated signaling pathway                                                       | 9  | 5.00E-06 |
| GO.0051246 | Regulation of protein metabolic process                                                    | 76 | 5.21E-06 |
| GO.0097202 | Activation of cysteine-type endopeptidase activity                                         | 13 | 5.24E-06 |
| GO.0002699 | Positive regulation of immune effector process                                             | 15 | 5.25E-06 |
| GO.1903039 | Positive regulation of leukocyte cell-cell adhesion                                        | 16 | 5.93E-06 |
| GO.0040011 | Locomotion                                                                                 | 47 | 6.10E-06 |
| GO.0010950 | Positive regulation of endopeptidase activity                                              | 15 | 6.21E-06 |
| GO.0051247 | Positive regulation of protein metabolic process                                           | 52 | 6.32E-06 |
| GO.0045058 | T cell selection                                                                           | 8  | 6.76E-06 |
| GO.0050853 | B cell receptor signaling pathway                                                          | 8  | 6.76E-06 |
| GO.0071346 | Cellular response to interferon-gamma                                                      | 12 | 7.56E-06 |
| GO.0006928 | Movement of cell or subcellular component                                                  | 50 | 7.98E-06 |
| GO.0042110 | T cell activation                                                                          | 18 | 7.99E-06 |
| GO.0042035 | Regulation of cytokine biosynthetic process                                                | 12 | 8.36E-06 |
| GO.0002456 | T cell mediated immunity                                                                   | 7  | 8.77E-06 |
| GO.0034109 | Homotypic cell-cell adhesion                                                               | 20 | 9.38E-06 |
| GO.0007049 | Cell cycle                                                                                 | 50 | 9.80E-06 |
| GO.0030097 | Hemopoiesis                                                                                | 28 | 9.98E-06 |
| GO.0042060 | Wound healing                                                                              | 33 | 1.12E-05 |
| GO.0044403 | Symbiosis                                                                                  |    |          |
| GO.0022407 | Regulation of cell-cell adhesion                                                           | 22 | 1.17E-05 |
| GO.1902531 | Regulation of intracellular signal transduction                                            | 51 | 1.18E-05 |

|            |                                                                                  |     |          |
|------------|----------------------------------------------------------------------------------|-----|----------|
| GO.1903037 | Regulation of leukocyte cell-cell adhesion                                       | 19  | 1.20E-05 |
| GO.0032101 | Regulation of response to external stimulus                                      | 38  | 1.24E-05 |
| GO.0043067 | Regulation of programmed cell death                                              | 51  | 1.25E-05 |
| GO.2000401 | Regulation of lymphocyte migration                                               | 8   | 1.31E-05 |
| GO.0038093 | Fc receptor signaling pathway                                                    | 18  | 1.35E-05 |
| GO.2001056 | Positive regulation of cysteine-type endopeptidase activity                      | 14  | 1.39E-05 |
| GO.0002705 | Positive regulation of leukocyte mediated immunity                               | 11  | 1.42E-05 |
| GO.0006919 | Activation of cysteine-type endopeptidase activity involved in apoptotic process | 12  | 1.53E-05 |
| GO.0006935 | Chemotaxis                                                                       | 31  | 1.53E-05 |
| GO.0016337 | Single organismal cell-cell adhesion                                             | 25  | 1.54E-05 |
| GO.0032760 | Positive regulation of tumor necrosis factor production                          | 9   | 1.64E-05 |
| GO.1901700 | Response to oxygen-containing compound                                           | 49  | 1.79E-05 |
| GO.0052548 | Regulation of endopeptidase activity                                             | 23  | 1.95E-05 |
| GO.0043281 | Regulation of cysteine-type endopeptidase activity involved in apoptotic process | 17  | 1.99E-05 |
| GO.0050870 | Positive regulation of t cell activation                                         | 15  | 2.01E-05 |
| GO.0008283 | Cell proliferation                                                               | 32  | 2.05E-05 |
| GO.0072678 | T cell migration                                                                 | 6   | 2.05E-05 |
| GO.0051674 | Localization of cell                                                             | 36  | 2.07E-05 |
| GO.0042981 | Regulation of apoptotic process                                                  | 50  | 2.22E-05 |
| GO.0032649 | Regulation of interferon-gamma production                                        | 11  | 2.45E-05 |
| GO.0044763 | Single-organism cellular process                                                 | 211 | 2.45E-05 |
| GO.0030217 | T cell differentiation                                                           | 13  | 2.63E-05 |
| GO.0070201 | Regulation of establishment of protein localization                              | 35  | 2.95E-05 |
| GO.0050863 | Regulation of t cell activation                                                  | 18  | 3.11E-05 |
| GO.0032880 | Regulation of protein localization                                               | 38  | 3.46E-05 |
| GO.0032729 | Positive regulation of interferon-gamma production                               | 9   | 3.60E-05 |
| GO.0050729 | Positive regulation of inflammatory response                                     | 11  | 3.81E-05 |
| GO.0022402 | Cell cycle process                                                               | 41  | 3.96E-05 |
| GO.1902107 | Positive regulation of leukocyte differentiation                                 | 13  | 4.03E-05 |
| GO.0002449 | Lymphocyte mediated immunity                                                     | 12  | 4.37E-05 |
| GO.0043900 | Regulation of multi-organism process                                             | 25  | 4.77E-05 |
| GO.0045619 | Regulation of lymphocyte differentiation                                         | 13  | 4.77E-05 |
| GO.0060255 | Regulation of macromolecule metabolic process                                    | 129 | 4.98E-05 |

|            |                                                                     |     |          |
|------------|---------------------------------------------------------------------|-----|----------|
| GO.0032268 | Regulation of cellular protein metabolic process                    | 69  | 5.18E-05 |
| GO.0097190 | Apoptotic signaling pathway                                         | 21  | 5.36E-05 |
| GO.0042127 | Regulation of cell proliferation                                    | 51  | 5.44E-05 |
| GO.0032879 | Regulation of localization                                          | 69  | 5.92E-05 |
| GO.0010819 | Regulation of t cell chemotaxis                                     | 5   | 5.98E-05 |
| GO.0042102 | Positive regulation of t cell proliferation                         | 10  | 6.12E-05 |
| GO.0006968 | Cellular defense response                                           | 9   | 6.26E-05 |
| GO.1903555 | Regulation of tumor necrosis factor superfamily cytokine production | 11  | 6.26E-05 |
| GO.0038096 | Fc-gamma receptor signaling pathway involved in phagocytosis        | 10  | 6.73E-05 |
| GO.0060341 | Regulation of cellular localization                                 | 44  | 6.73E-05 |
| GO.0009611 | Response to wounding                                                | 33  | 7.02E-05 |
| GO.0051050 | Positive regulation of transport                                    | 36  | 7.08E-05 |
| GO.0097529 | Myeloid leukocyte migration                                         | 10  | 8.45E-05 |
| GO.0045862 | Positive regulation of proteolysis                                  | 21  | 9.25E-05 |
| GO.0045621 | Positive regulation of lymphocyte differentiation                   | 10  | 9.47E-05 |
| GO.0033209 | Tumor necrosis factor-mediated signaling pathway                    | 7   | 9.86E-05 |
| GO.0006909 | Phagocytosis                                                        | 14  | 9.89E-05 |
| GO.0032844 | Regulation of homeostatic process                                   | 21  | 9.98E-05 |
| GO.0006508 | Proteolysis                                                         | 41  | 0.000107 |
| GO.0022610 | Biological adhesion                                                 | 38  | 0.000107 |
| GO.0032270 | Positive regulation of cellular protein metabolic process           | 46  | 0.000107 |
| GO.0002224 | Toll-like receptor signaling pathway                                | 12  | 0.000109 |
| GO.0043901 | Negative regulation of multi-organism process                       | 13  | 0.000116 |
| GO.0007264 | Small gtpase mediated signal transduction                           | 30  | 0.000117 |
| GO.0007093 | Mitotic cell cycle checkpoint                                       | 14  | 0.000119 |
| GO.0050864 | Regulation of b cell activation                                     | 11  | 0.000131 |
| GO.0002443 | Leukocyte mediated immunity                                         | 13  | 0.000133 |
| GO.0019835 | Cytolysis                                                           | 6   | 0.000133 |
| GO.0051239 | Regulation of multicellular organismal process                      | 69  | 0.000152 |
| GO.0050670 | Regulation of lymphocyte proliferation                              | 14  | 0.000156 |
| GO.1903034 | Regulation of response to wounding                                  | 21  | 0.000156 |
| GO.0016032 | Viral process                                                       | 31  | 0.000157 |
| GO.0050727 | Regulation of inflammatory response                                 | 17  | 0.000159 |
| GO.0032673 | Regulation of interleukin-4 production                              | 6   | 0.00017  |
| GO.0042113 | B cell activation                                                   | 12  | 0.000173 |
| GO.0019222 | Regulation of metabolic process                                     | 144 | 0.000187 |
| GO.0071222 | Cellular response to lipopolysaccharide                             | 12  | 0.000187 |
| GO.0032663 | Regulation of interleukin-2 production                              | 8   | 0.000194 |

|            |                                                                        |     |          |
|------------|------------------------------------------------------------------------|-----|----------|
| GO.0080090 | Regulation of primary metabolic process                                | 127 | 0.000195 |
|            | Positive regulation of lymphocyte proliferation                        | 11  | 0.000198 |
| GO.0050671 | Cellular response to biotic stimulus                                   | 13  | 0.000198 |
| GO.0071216 | Positive regulation of b cell differentiation                          | 5   | 0.000203 |
| GO.0045579 | T cell receptor signaling pathway                                      | 10  | 0.000208 |
| GO.0050852 | Cell adhesion                                                          | 37  | 0.000218 |
| GO.0007155 | Regulation of i-kappab kinase/nf-kappab signaling                      | 16  | 0.000222 |
| GO.0043122 | Regulation of protein transport                                        | 31  | 0.000223 |
| GO.0051223 | Positive regulation of i-kappab kinase/nf-kappab signaling             | 14  | 0.000232 |
| GO.0043123 | Regulation of antigen receptor-mediated signaling pathway              | 7   | 0.000239 |
| GO.0050854 | Positive regulation of multicellular organismal process                | 46  | 0.00024  |
| GO.0051240 | Positive regulation of apoptotic process                               | 26  | 0.00025  |
| GO.0043065 | Regulation of cellular metabolic process                               | 130 | 0.000258 |
| GO.0031323 | Positive regulation of cell death                                      | 27  | 0.00027  |
| GO.0010942 | Regulation of tumor necrosis factor production                         | 10  | 0.000272 |
| GO.0032680 | Protein maturation                                                     | 17  | 0.000289 |
| GO.0051604 | Cell-cell adhesion                                                     | 26  | 0.000351 |
| GO.0098609 | Protein processing                                                     | 16  | 0.000385 |
| GO.0016485 | Dendritic cell chemotaxis                                              | 5   | 0.000394 |
| GO.0002407 | Protein autophosphorylation                                            | 14  | 0.000503 |
| GO.0046777 | Regulation of lymphocyte mediated immunity                             | 10  | 0.000521 |
| GO.0002706 | Thymic t cell selection                                                | 5   | 0.000542 |
| GO.0045061 | Negative regulation of t cell apoptotic process                        | 5   | 0.000542 |
| GO.0070233 | Leukocyte activation involved in immune response                       | 11  | 0.000559 |
| GO.0002366 | Toll-like receptor 4 signaling pathway                                 | 10  | 0.000564 |
| GO.0034142 | Homeostatic process                                                    | 44  | 0.000606 |
| GO.0042592 | Positive regulation of leukocyte migration                             | 10  | 0.000612 |
| GO.0002687 | Positive regulation of release of sequestered calcium ion into cytosol | 6   | 0.000622 |
| GO.0051281 | T cell chemotaxis                                                      | 4   | 0.000657 |
| GO.0010818 | Positive regulation of cytokine secretion                              | 9   | 0.00066  |
| GO.0050715 | Positive regulation of intracellular signal transduction               | 32  | 0.00068  |
| GO.1902533 | Positive regulation of interleukin-4 production                        | 5   | 0.000713 |
| GO.0032753 | Negative regulation of viral process                                   | 9   | 0.000725 |
| GO.0048525 |                                                                        |     |          |

|            |                                                               |     |          |
|------------|---------------------------------------------------------------|-----|----------|
| GO.0031324 | Negative regulation of cellular metabolic process             | 64  | 0.000729 |
| GO.0042129 | Regulation of t cell proliferation                            | 11  | 0.000738 |
| GO.0001912 | Positive regulation of leukocyte mediated cytotoxicity        | 6   | 0.000745 |
| GO.0050871 | Positive regulation of b cell activation                      | 8   | 0.000752 |
| GO.0032846 | Positive regulation of homeostatic process                    | 12  | 0.000842 |
| GO.0002708 | Positive regulation of lymphocyte mediated immunity           | 8   | 0.000844 |
| GO.0097300 | Programmed necrotic cell death                                | 6   | 0.000897 |
| GO.0016043 | Cellular component organization                               | 112 | 0.000929 |
| GO.0050707 | Regulation of cytokine secretion                              | 11  | 0.000976 |
| GO.0002683 | Negative regulation of immune system process                  | 19  | 0.001    |
| GO.0007346 | Regulation of mitotic cell cycle                              | 22  | 0.00102  |
| GO.0010820 | Positive regulation of t cell chemotaxis                      | 4   | 0.00102  |
| GO.0032386 | Regulation of intracellular transport                         | 25  | 0.0011   |
| GO.0050714 | Positive regulation of protein secretion                      | 13  | 0.00115  |
| GO.0048878 | Chemical homeostasis                                          | 32  | 0.0012   |
| GO.0051279 | Regulation of release of sequestered calcium ion into cytosol | 8   | 0.00129  |
| GO.0031399 | Regulation of protein modification process                    | 49  | 0.00133  |
| GO.0002685 | Regulation of leukocyte migration                             | 11  | 0.00145  |
| GO.0032743 | Positive regulation of interleukin-2 production               | 6   | 0.00148  |
| GO.0045060 | Negative thymic t cell selection                              | 4   | 0.00152  |
| GO.0048010 | Vascular endothelial growth factor receptor signaling pathway | 10  | 0.00154  |
| GO.0071621 | Granulocyte chemotaxis                                        | 7   | 0.00155  |
| GO.0051301 | Cell division                                                 | 22  | 0.00156  |
| GO.0071840 | Cellular component organization or biogenesis                 | 113 | 0.00156  |
| GO.0032845 | Negative regulation of homeostatic process                    | 9   | 0.00158  |
| GO.0032388 | Positive regulation of intracellular transport                | 18  | 0.00161  |
| GO.0050708 | Regulation of protein secretion                               | 19  | 0.00169  |
| GO.0070661 | Leukocyte proliferation                                       | 9   | 0.00171  |
| GO.0009725 | Response to hormone                                           | 32  | 0.00172  |
| GO.0001816 | Cytokine production                                           | 10  | 0.00174  |
| GO.0006796 | Phosphate-containing compound metabolic process               | 53  | 0.00184  |
| GO.0002831 | Regulation of response to biotic stimulus                     | 14  | 0.00203  |
| GO.0050793 | Regulation of developmental process                           | 59  | 0.00204  |
| GO.0032479 | Regulation of type i interferon production                    | 10  | 0.00214  |
| GO.0034612 | Response to tumor necrosis factor                             | 10  | 0.00214  |



|            |                                                                    |     |         |
|------------|--------------------------------------------------------------------|-----|---------|
| GO.0007259 | Jak-stat cascade                                                   | 7   | 0.00216 |
| GO.0071356 | Cellular response to tumor necrosis factor                         | 9   | 0.00233 |
| GO.0009719 | Response to endogenous stimulus                                    | 44  | 0.00245 |
| GO.0006875 | Cellular metal ion homeostasis                                     | 19  | 0.00251 |
| GO.0097527 | Necroptotic signaling pathway                                      | 3   | 0.00251 |
| GO.0019725 | Cellular homeostasis                                               | 26  | 0.00259 |
| GO.0043434 | Response to peptide hormone                                        | 20  | 0.00259 |
|            | Positive regulation of cellular component movement                 |     |         |
| GO.0051272 |                                                                    | 18  | 0.0026  |
| GO.0006301 | Postreplication repair                                             | 7   | 0.00268 |
| GO.0006897 | Endocytosis                                                        | 22  | 0.00275 |
| GO.0007095 | Mitotic g2 dna damage checkpoint                                   | 4   | 0.00288 |
| GO.0019220 | Regulation of phosphate metabolic process                          | 46  | 0.00288 |
|            | Positive regulation of interleukin-2 biosynthetic process          |     |         |
| GO.0045086 |                                                                    | 4   | 0.00288 |
|            | Positive regulation of leukocyte chemotaxis                        |     |         |
| GO.0002690 |                                                                    | 8   | 0.00289 |
|            | Positive regulation of cytokine biosynthetic process               |     |         |
| GO.0042108 |                                                                    | 7   | 0.00295 |
| GO.0038083 | Peptidyl-tyrosine autophosphorylation                              | 6   | 0.00296 |
|            | Positive regulation of protein complex assembly                    |     |         |
| GO.0031334 |                                                                    | 11  | 0.00305 |
| GO.0055074 | Calcium ion homeostasis                                            | 16  | 0.00305 |
| GO.1903532 | Positive regulation of secretion by cell                           | 16  | 0.00305 |
| GO.0007229 | Integrin-mediated signaling pathway                                | 8   | 0.00312 |
| GO.1903901 | Negative regulation of viral life cycle                            | 8   | 0.00312 |
|            | Negative regulation of macromolecule metabolic process             |     |         |
| GO.0010605 |                                                                    | 61  | 0.00314 |
| GO.0019882 | Antigen processing and presentation                                | 13  | 0.00314 |
| GO.0002828 | Regulation of type 2 immune response                               | 5   | 0.00318 |
| GO.0040017 | Positive regulation of locomotion                                  | 18  | 0.00318 |
| GO.0051047 | Positive regulation of secretion                                   | 17  | 0.00318 |
| GO.0071396 | Cellular response to lipid                                         | 18  | 0.00318 |
| GO.2000021 | Regulation of ion homeostasis                                      | 12  | 0.0034  |
| GO.0050801 | Ion homeostasis                                                    | 23  | 0.00341 |
| GO.0045580 | Regulation of t cell differentiation                               | 9   | 0.00347 |
| GO.0044699 | Single-organism process                                            | 207 | 0.00352 |
| GO.0051726 | Regulation of cell cycle                                           | 33  | 0.00353 |
| GO.0009891 | Positive regulation of biosynthetic process                        | 51  | 0.00368 |
|            | Positive regulation of antigen receptor-mediated signaling pathway |     |         |
| GO.0050857 |                                                                    | 4   | 0.00373 |
| GO.0070266 | Necroptotic process                                                | 5   | 0.00375 |
| GO.0031295 | T cell costimulation                                               | 7   | 0.00386 |
| GO.0046634 | Regulation of alpha-beta t cell activation                         | 7   | 0.00386 |
|            | Positive regulation of response to external stimulus               |     |         |
| GO.0032103 |                                                                    | 18  | 0.00395 |

|            |                                                                                                                                                  |    |         |
|------------|--------------------------------------------------------------------------------------------------------------------------------------------------|----|---------|
| GO.0044092 | Negative regulation of molecular function                                                                                                        | 36 | 0.00411 |
| GO.0009892 | Negative regulation of metabolic process                                                                                                         | 66 | 0.00417 |
| GO.2000107 | Negative regulation of leukocyte apoptotic process                                                                                               | 6  | 0.00421 |
| GO.0002824 | Positive regulation of adaptive immune response based on somatic recombination of immune receptors built from immunoglobulin superfamily domains | 7  | 0.00423 |
| GO.0007204 | Positive regulation of cytosolic calcium ion concentration                                                                                       | 11 | 0.0043  |
| GO.0045937 | Positive regulation of phosphate metabolic process                                                                                               | 33 | 0.0043  |
| GO.0003149 | Membranous septum morphogenesis                                                                                                                  | 3  | 0.00435 |
| GO.0030335 | Positive regulation of cell migration                                                                                                            | 17 | 0.00436 |
| GO.0044774 | Mitotic dna integrity checkpoint                                                                                                                 | 9  | 0.00446 |
| GO.0034138 | Toll-like receptor 3 signaling pathway                                                                                                           | 8  | 0.00447 |
| GO.0046651 | Lymphocyte proliferation                                                                                                                         | 8  | 0.00447 |
| GO.0051049 | Regulation of transport                                                                                                                          | 50 | 0.00447 |
| GO.0055082 | Cellular chemical homeostasis                                                                                                                    | 22 | 0.00468 |
| GO.0046641 | Positive regulation of alpha-beta t cell proliferation                                                                                           | 4  | 0.00471 |
| GO.1903530 | Regulation of secretion by cell                                                                                                                  | 24 | 0.00471 |
| GO.0051928 | Positive regulation of calcium ion transport                                                                                                     | 9  | 0.00508 |
| GO.0034113 | Heterotypic cell-cell adhesion                                                                                                                   | 5  | 0.00511 |
| GO.0002637 | Regulation of immunoglobulin production                                                                                                          | 6  | 0.00517 |
| GO.0019538 | Protein metabolic process                                                                                                                        | 94 | 0.00517 |
| GO.0045071 | Negative regulation of viral genome replication                                                                                                  | 6  | 0.00517 |
| GO.0051173 | Positive regulation of nitrogen compound metabolic process                                                                                       | 50 | 0.00517 |
| GO.0051222 | Positive regulation of protein transport                                                                                                         | 19 | 0.00529 |
| GO.0006874 | Cellular calcium ion homeostasis                                                                                                                 | 15 | 0.00538 |
| GO.0051347 | Positive regulation of transferase activity                                                                                                      | 23 | 0.0054  |
| GO.0010557 | Positive regulation of macromolecule biosynthetic process                                                                                        | 47 | 0.00546 |
| GO.0055065 | Metal ion homeostasis                                                                                                                            | 20 | 0.0057  |
| GO.0046635 | Positive regulation of alpha-beta t cell activation                                                                                              | 6  | 0.00576 |
| GO.0002639 | Positive regulation of immunoglobulin production                                                                                                 | 5  | 0.00581 |
| GO.0032735 | Positive regulation of interleukin-12 production                                                                                                 | 5  | 0.00581 |
| GO.0002700 | Regulation of production of molecular mediator of immune response                                                                                | 8  | 0.00587 |
| GO.0031579 | Membrane raft organization                                                                                                                       | 4  | 0.00587 |

|            |                                                                                           |     |         |
|------------|-------------------------------------------------------------------------------------------|-----|---------|
| GO.0051091 | Positive regulation of sequence-specific dna binding transcription factor activity        | 13  | 0.00587 |
| GO.0097305 | Response to alcohol                                                                       | 16  | 0.0059  |
| GO.0051248 | Negative regulation of protein metabolic process                                          | 34  | 0.00616 |
| GO.0002285 | Lymphocyte activation involved in immune response                                         | 8   | 0.0063  |
| GO.0045935 | Positive regulation of nucleobase-containing compound metabolic process                   | 48  | 0.00642 |
| GO.0051046 | Regulation of secretion                                                                   | 25  | 0.00646 |
| GO.0001913 | T cell mediated cytotoxicity                                                              | 3   | 0.00674 |
| GO.0019441 | Tryptophan catabolic process to kynurenine                                                | 3   | 0.00674 |
| GO.0050862 | Positive regulation of t cell receptor signaling pathway                                  | 3   | 0.00674 |
| GO.0031328 | Positive regulation of cellular biosynthetic process                                      | 49  | 0.00691 |
| GO.0033554 | Cellular response to stress                                                               | 47  | 0.00705 |
| GO.0043154 | Negative regulation of cysteine-type endopeptidase activity involved in apoptotic process | 8   | 0.00723 |
| GO.0034314 | Arp2/3 complex-mediated actin nucleation                                                  | 4   | 0.00727 |
| GO.0045069 | Regulation of viral genome replication                                                    | 7   | 0.0075  |
| GO.0031401 | Positive regulation of protein modification process                                       | 34  | 0.00752 |
| GO.0055080 | Cation homeostasis                                                                        | 21  | 0.00757 |
| GO.0042325 | Regulation of phosphorylation                                                             | 39  | 0.00763 |
| GO.0045124 | Regulation of bone resorption                                                             | 5   | 0.00764 |
| GO.0019985 | Translesion synthesis                                                                     | 6   | 0.00769 |
| GO.0033077 | T cell differentiation in thymus                                                          | 6   | 0.00769 |
| GO.0001932 | Regulation of protein phosphorylation                                                     | 37  | 0.00774 |
| GO.0051090 | Regulation of sequence-specific dna binding transcription factor activity                 | 17  | 0.00797 |
| GO.0038095 | Fc-epsilon receptor signaling pathway                                                     | 11  | 0.00848 |
| GO.0009165 | Nucleotide biosynthetic process                                                           | 12  | 0.00854 |
| GO.0006271 | Dna strand elongation involved in dna replication                                         | 5   | 0.00866 |
| GO.0051209 | Release of sequestered calcium ion into cytosol                                           | 5   | 0.00866 |
| GO.0002274 | Myeloid leukocyte activation                                                              | 8   | 0.00869 |
| GO.0009987 | Cellular process                                                                          | 232 | 0.00872 |
| GO.0045954 | Positive regulation of natural killer cell mediated cytotoxicity                          | 4   | 0.00872 |
| GO.0048535 | Lymph node development                                                                    | 4   | 0.00872 |
| GO.0001818 | Negative regulation of cytokine production                                                | 12  | 0.00918 |

|            |                                                                                                                                         |    |         |
|------------|-----------------------------------------------------------------------------------------------------------------------------------------|----|---------|
| GO.0001906 | Cell killing                                                                                                                            | 6  | 0.0093  |
| GO.0006468 | Protein phosphorylation                                                                                                                 | 28 | 0.00943 |
| GO.0045595 | Regulation of cell differentiation                                                                                                      | 43 | 0.00947 |
| GO.0051338 | Regulation of transferase activity                                                                                                      | 30 | 0.00949 |
| GO.0000082 | G1/s transition of mitotic cell cycle                                                                                                   | 11 | 0.00953 |
| GO.0031648 | Protein destabilization                                                                                                                 | 5  | 0.00975 |
| GO.0002693 | Positive regulation of cellular extravasation                                                                                           | 3  | 0.00979 |
| GO.0098771 | Inorganic ion homeostasis                                                                                                               | 21 | 0.00983 |
| GO.1903649 | Regulation of cytoplasmic transport                                                                                                     | 19 | 0.00989 |
| GO.0003366 | Cell-matrix adhesion involved in ameoboidal cell migration                                                                              | 2  | 0.01    |
| GO.0045404 | Positive regulation of interleukin-4 biosynthetic process                                                                               | 2  | 0.01    |
| GO.0046631 | Alpha-beta t cell activation                                                                                                            | 6  | 0.01    |
| GO.0097049 | Motor neuron apoptotic process                                                                                                          | 2  | 0.01    |
| GO.2000451 | Positive regulation of cd8-positive Regulation of cellular component organization                                                       | 57 | 0.0102  |
| GO.0002573 | Myeloid leukocyte differentiation                                                                                                       | 8  | 0.0103  |
| GO.0002822 | Regulation of adaptive immune response based on somatic recombination of immune receptors built from immunoglobulin superfamily domains | 8  | 0.0103  |
| GO.0006464 | Cellular protein modification process                                                                                                   | 67 | 0.0103  |
| GO.0043412 | Macromolecule modification                                                                                                              | 70 | 0.0103  |
| GO.0051603 | Proteolysis involved in cellular protein catabolic process                                                                              | 20 | 0.0103  |
| GO.2000514 | Regulation of cd4-positive                                                                                                              |    |         |
| GO.0045786 | Negative regulation of cell cycle                                                                                                       | 19 | 0.011   |
| GO.0010564 | Regulation of cell cycle process                                                                                                        | 21 | 0.0113  |
| GO.0051092 | Positive regulation of nf-kappab transcription factor activity                                                                          | 9  | 0.0119  |
| GO.0070228 | Regulation of lymphocyte apoptotic process                                                                                              | 6  | 0.012   |
| GO.0090630 | Activation of gtpase activity                                                                                                           | 5  | 0.0122  |
| GO.0044773 | Mitotic dna damage checkpoint                                                                                                           | 8  | 0.0123  |
| GO.0031570 | Dna integrity checkpoint                                                                                                                | 10 | 0.0124  |
| GO.0045861 | Negative regulation of proteolysis                                                                                                      | 16 | 0.0129  |
| GO.0048585 | Negative regulation of response to stimulus                                                                                             | 39 | 0.0131  |
| GO.0001771 | Immunological synapse formation                                                                                                         | 3  | 0.0135  |
| GO.0010529 | Negative regulation of transposition                                                                                                    | 3  | 0.0135  |
| GO.0051495 | Positive regulation of cytoskeleton organization                                                                                        | 10 | 0.0136  |
| GO.0032653 | Regulation of interleukin-10 production                                                                                                 | 5  | 0.0137  |

|            |                                                                |    |        |
|------------|----------------------------------------------------------------|----|--------|
| GO.0019219 | Regulation of nucleobase-containing compound metabolic process | 87 | 0.014  |
| GO.0035666 | Trif-dependent toll-like receptor signaling pathway            | 7  | 0.0141 |
| GO.0044772 | Mitotic cell cycle phase transition                            | 15 | 0.0147 |
| GO.0045893 | Positive regulation of transcription                           |    |        |
| GO.2001235 | Positive regulation of apoptotic signaling pathway             | 11 | 0.0148 |
| GO.0006281 | Dna repair                                                     | 18 | 0.015  |
| GO.0032269 | Negative regulation of cellular protein metabolic process      | 31 | 0.015  |
| GO.2000106 | Regulation of leukocyte apoptotic process                      | 7  | 0.015  |
| GO.0034103 | Regulation of tissue remodeling                                | 6  | 0.0154 |
| GO.0044257 | Cellular protein catabolic process                             | 20 | 0.0154 |
| GO.1901990 | Regulation of mitotic cell cycle phase transition              | 13 | 0.0156 |
| GO.1901575 | Organic substance catabolic process                            | 43 | 0.0159 |
| GO.0051171 | Regulation of nitrogen compound metabolic process              | 92 | 0.016  |
| GO.0050688 | Regulation of defense response to virus                        | 11 | 0.0166 |
| GO.0051241 | Negative regulation of multicellular organismal process        | 31 | 0.0168 |
| GO.0000819 | Sister chromatid segregation                                   | 7  | 0.017  |
| GO.0016572 | Histone phosphorylation                                        | 4  | 0.017  |
| GO.0051130 | Positive regulation of cellular component organization         | 35 | 0.017  |
| GO.0030163 | Protein catabolic process                                      | 21 | 0.0171 |
| GO.0002664 | Regulation of t cell tolerance induction                       | 3  | 0.0179 |
| GO.1901701 | Cellular response to oxygen-containing compound                | 27 | 0.0182 |
| GO.0010628 | Positive regulation of gene expression                         | 46 | 0.0188 |
| GO.0034121 | Regulation of toll-like receptor signaling pathway             | 5  | 0.0188 |
| GO.0042098 | T cell proliferation                                           | 5  | 0.0188 |
| GO.0051270 | Regulation of cellular component movement                      | 25 | 0.0191 |
| GO.0033273 | Response to vitamin                                            | 7  | 0.0195 |
| GO.0071363 | Cellular response to growth factor stimulus                    | 23 | 0.0196 |
| GO.0043254 | Regulation of protein complex assembly                         | 14 | 0.0204 |
| GO.0043113 | Receptor clustering                                            | 5  | 0.0209 |
| GO.0045670 | Regulation of osteoclast differentiation                       | 6  | 0.0212 |
| GO.0016310 | Phosphorylation                                                | 33 | 0.0213 |
| GO.0046330 | Positive regulation of jnk cascade                             | 8  | 0.0215 |
| GO.0030099 | Myeloid cell differentiation                                   | 11 | 0.0226 |
| GO.0071156 | Regulation of cell cycle arrest                                | 8  | 0.0227 |

|            |                                               |    |        |
|------------|-----------------------------------------------|----|--------|
| GO.0006974 | Cellular response to dna damage stimulus      | 24 | 0.0234 |
| GO.0032611 | Interleukin-1 beta production                 | 3  | 0.0234 |
|            | Positive regulation of interleukin-17         |    |        |
| GO.0032740 | production                                    | 3  | 0.0234 |
| GO.0018193 | Peptidyl-amino acid modification              | 28 | 0.0238 |
| GO.0044267 | Cellular protein metabolic process            | 79 | 0.0242 |
| GO.1901698 | Response to nitrogen compound                 | 28 | 0.0246 |
| GO.0001766 | Membrane raft polarization                    | 2  | 0.0249 |
|            | Regulation of cytokine-mediated signaling     |    |        |
| GO.0001959 | pathway                                       | 8  | 0.0249 |
| GO.0043420 | Anthranilate metabolic process                | 2  | 0.0249 |
|            | Regulation of interleukin-10 biosynthetic     |    |        |
| GO.0045074 | process                                       | 2  | 0.0249 |
| GO.0046633 | Alpha-beta t cell proliferation               | 2  | 0.0249 |
|            | Nucleoside phosphate biosynthetic             |    |        |
| GO.1901293 | process                                       | 11 | 0.0249 |
| GO.0030593 | Neutrophil chemotaxis                         | 5  | 0.0251 |
| GO.0040012 | Regulation of locomotion                      | 24 | 0.0253 |
| GO.0043903 | Regulation of symbiosis                       |    |        |
|            | Regulation of myeloid leukocyte               |    |        |
| GO.0002761 | differentiation                               | 8  | 0.0261 |
| GO.0034105 | Positive regulation of tissue remodeling      | 4  | 0.0261 |
| GO.0071158 | Positive regulation of cell cycle arrest      | 7  | 0.0261 |
| GO.0000077 | Dna damage checkpoint                         | 9  | 0.0263 |
| GO.0010243 | Response to organonitrogen compound           | 26 | 0.0269 |
| GO.0043086 | Negative regulation of catalytic activity     | 27 | 0.0273 |
| GO.0050920 | Regulation of chemotaxis                      | 9  | 0.0275 |
|            | Cell morphogenesis involved in                |    |        |
| GO.0000904 | differentiation                               | 23 | 0.0281 |
| GO.0051276 | Chromosome organization                       | 28 | 0.0288 |
|            | Regulation of b cell receptor signaling       |    |        |
| GO.0050855 | pathway                                       | 3  | 0.0291 |
|            | Positive regulation of rna metabolic          |    |        |
| GO.0051254 | process                                       | 41 | 0.0294 |
| GO.0033280 | Response to vitamin d                         | 4  | 0.0296 |
| GO.0033674 | Positive regulation of kinase activity        | 18 | 0.0296 |
|            | Negative regulation of cytokine               |    |        |
| GO.0042036 | biosynthetic process                          | 4  | 0.0296 |
| GO.2000516 | Positive regulation of cd4-positive           |    |        |
| GO.0042327 | Positive regulation of phosphorylation        | 27 | 0.0298 |
| GO.0045582 | Positive regulation of t cell differentiation | 6  | 0.0298 |
| GO.0050792 | Regulation of viral process                   | 10 | 0.0315 |
| GO.1903827 | Regulation of cellular protein localization   | 19 | 0.0315 |
|            | Regulation of multicellular organismal        |    |        |
| GO.2000026 | development                                   | 42 | 0.0315 |
| GO.0044248 | Cellular catabolic process                    | 40 | 0.0326 |

|            |                                                                |     |        |
|------------|----------------------------------------------------------------|-----|--------|
| GO.0050856 | Regulation of t cell receptor signaling pathway                | 4   | 0.0334 |
| GO.0060142 | Regulation of syncytium formation by plasma membrane fusion    | 4   | 0.0334 |
| GO.0071353 | Cellular response to interleukin-4                             | 4   | 0.0334 |
| GO.0008284 | Positive regulation of cell proliferation                      | 26  | 0.0336 |
| GO.0001934 | Positive regulation of protein phosphorylation                 | 26  | 0.0342 |
| GO.0032501 | Multicellular organismal process                               | 119 | 0.0347 |
| GO.0061564 | Axon development                                               | 19  | 0.0349 |
| GO.0043950 | Positive regulation of camp-mediated signaling                 | 3   | 0.0357 |
| GO.0045730 | Respiratory burst                                              | 3   | 0.0357 |
| GO.0045780 | Positive regulation of bone resorption                         | 3   | 0.0357 |
| GO.0090026 | Positive regulation of monocyte chemotaxis                     | 3   | 0.0357 |
| GO.0090068 | Positive regulation of cell cycle process                      | 12  | 0.0365 |
| GO.0000280 | Nuclear division                                               | 17  | 0.0366 |
| GO.0007162 | Negative regulation of cell adhesion                           | 11  | 0.037  |
| GO.0050690 | Regulation of defense response to virus by virus               | 4   | 0.0376 |
| GO.0002223 | Stimulatory c-type lectin receptor signaling pathway           | 8   | 0.0378 |
| GO.0050848 | Regulation of calcium-mediated signaling                       | 5   | 0.0385 |
| GO.0051056 | Regulation of small gtpase mediated signal transduction        | 11  | 0.0413 |
| GO.0007568 | Aging                                                          | 12  | 0.0415 |
| GO.0045859 | Regulation of protein kinase activity                          | 23  | 0.0415 |
| GO.2000145 | Regulation of cell motility                                    | 22  | 0.0419 |
| GO.0050850 | Positive regulation of calcium-mediated signaling              | 4   | 0.0425 |
| GO.0000070 | Mitotic sister chromatid segregation                           | 6   | 0.0432 |
| GO.0002827 | Positive regulation of t-helper 1 type immune response         | 3   | 0.0432 |
| GO.0002830 | Positive regulation of type 2 immune response                  | 3   | 0.0432 |
| GO.0003150 | Muscular septum morphogenesis                                  | 2   | 0.0432 |
| GO.0006517 | Protein deglycosylation                                        | 2   | 0.0432 |
| GO.0006878 | Cellular copper ion homeostasis                                | 3   | 0.0432 |
| GO.0019805 | Quinolinate biosynthetic process                               | 2   | 0.0432 |
| GO.0030334 | Regulation of cell migration                                   | 21  | 0.0432 |
| GO.0032070 | Regulation of deoxyribonuclease activity                       | 2   | 0.0432 |
| GO.0033634 | Positive regulation of cell-cell adhesion mediated by integrin | 2   | 0.0432 |
| GO.0034354 | De novo nad biosynthetic process from tryptophan               | 2   | 0.0432 |

|            |                                          |     |        |
|------------|------------------------------------------|-----|--------|
| GO.0038110 | Interleukin-2-mediated signaling pathway | 2   | 0.0432 |
|            | Positive regulation of mast cell         |     |        |
| GO.0043306 | degranulation                            | 3   | 0.0432 |
| GO.0051701 | Interaction with host                    | 8   | 0.0432 |
|            | Response to high density lipoprotein     |     |        |
| GO.0055099 | particle                                 | 2   | 0.0432 |
| GO.0070269 | Pyroptosis                               | 2   | 0.0432 |
| GO.0071260 | Cellular response to mechanical stimulus | 6   | 0.0432 |
| GO.0071352 | Cellular response to interleukin-2       | 2   | 0.0432 |
|            | Regulation of G2/M transition of mitotic |     |        |
| GO.0010389 | cell cycle                               | 5   | 0.0444 |
| GO.0043549 | Regulation of kinase activity            | 24  | 0.0446 |
| GO.0007059 | Chromosome segregation                   | 10  | 0.0457 |
| GO.0016192 | Vesicle-mediated transport               | 33  | 0.0458 |
| GO.0009057 | Macromolecule catabolic process          | 28  | 0.046  |
| GO.0044707 | Single-multicellular organism process    | 114 | 0.0477 |
|            | Positive regulation of cytoplasmic       |     |        |
| GO.1903651 | transport                                | 12  | 0.0482 |
| GO.0006259 | Dna metabolic process                    | 23  | 0.0487 |
| GO.0000723 | Telomere maintenance                     | 6   | 0.0489 |

---



**Table S3.2.** KEGG pathway enrichment in upregulated group of RA versus normalcy

| Pathway ID | Pathway description                              | Observed gene count | False discovery rate |
|------------|--------------------------------------------------|---------------------|----------------------|
| 4064       | NF-kappa B signaling pathway                     | 18                  | 9.00E-12             |
| 4060       | Cytokine-cytokine receptor interaction           | 27                  | 6.54E-11             |
| 4062       | Chemokine signaling pathway                      | 21                  | 1.62E-09             |
| 5162       | Measles                                          | 18                  | 2.06E-09             |
| 5166       | HTLV-I infection                                 | 24                  | 2.84E-09             |
| 4620       | Toll-like receptor signaling pathway             | 15                  | 2.19E-08             |
| 5340       | Primary immunodeficiency                         | 10                  | 2.19E-08             |
| 4650       | Natural killer cell mediated cytotoxicity        | 16                  | 3.79E-08             |
| 4640       | Hematopoietic cell lineage                       | 12                  | 1.66E-06             |
| 4380       | Osteoclast differentiation                       | 14                  | 1.90E-06             |
| 5164       | Influenza A                                      | 16                  | 2.13E-06             |
| 5168       | Herpes simplex infection                         | 16                  | 3.76E-06             |
| 4662       | B cell receptor signaling pathway                | 10                  | 1.09E-05             |
| 5140       | Leishmaniasis                                    | 10                  | 1.09E-05             |
| 4670       | Leukocyte transendothelial migration             | 12                  | 2.24E-05             |
| 4672       | Intestinal immune network for IgA production     | 8                   | 2.24E-05             |
| 4660       | T cell receptor signaling pathway                | 11                  | 3.33E-05             |
| 5169       | Epstein-Barr virus infection                     | 15                  | 3.98E-05             |
| 5323       | Rheumatoid arthritis                             | 10                  | 5.68E-05             |
| 5202       | Transcriptional misregulation in cancer          | 13                  | 0.000169             |
| 5152       | Tuberculosis                                     | 13                  | 0.000237             |
| 4114       | Oocyte meiosis                                   | 10                  | 0.000326             |
| 4668       | TNF signaling pathway                            | 10                  | 0.000339             |
| 4666       | Fc gamma R-mediated phagocytosis                 | 9                   | 0.000393             |
| 5133       | Pertussis                                        | 8                   | 0.000453             |
| 4514       | Cell adhesion molecules (CAMs)                   | 11                  | 0.000507             |
| 5142       | Chagas disease (American trypanosomiasis)        | 9                   | 0.000764             |
| 4611       | Platelet activation                              | 10                  | 0.00122              |
| 4630       | Jak-STAT signaling pathway                       | 11                  | 0.0014               |
| 4210       | Apoptosis                                        | 8                   | 0.00155              |
| 4115       | p53 signaling pathway                            | 7                   | 0.00185              |
| 4612       | Antigen processing and presentation              | 7                   | 0.00185              |
| 4664       | Fc epsilon RI signaling pathway                  | 7                   | 0.00185              |
| 5145       | Toxoplasmosis                                    | 9                   | 0.00199              |
| 5161       | Hepatitis B                                      | 10                  | 0.00218              |
| 5143       | African trypanosomiasis                          | 5                   | 0.00259              |
| 4750       | Inflammatory mediator regulation of TRP channels | 8                   | 0.00273              |
| 5330       | Allograft rejection                              | 5                   | 0.00284              |
| 5332       | Graft-versus-host disease                        | 5                   | 0.00363              |
| 4914       | Progesterone-mediated oocyte maturation          | 7                   | 0.00462              |

|      |                                     |    |         |
|------|-------------------------------------|----|---------|
| 920  | Sulfur metabolism                   | 3  | 0.00477 |
| 5132 | Salmonella infection                | 7  | 0.00511 |
| 4940 | Type I diabetes mellitus            | 5  | 0.00529 |
| 4970 | Salivary secretion                  | 7  | 0.00529 |
| 3050 | Proteasome                          | 5  | 0.00723 |
| 4270 | Vascular smooth muscle contraction  | 8  | 0.00836 |
| 5144 | Malaria                             | 5  | 0.00942 |
| 4810 | Regulation of actin cytoskeleton    | 11 | 0.0105  |
| 4110 | Cell cycle                          | 8  | 0.0109  |
| 4916 | Melanogenesis                       | 7  | 0.0115  |
| 5320 | Autoimmune thyroid disease          | 5  | 0.0115  |
| 5110 | Vibrio cholerae infection           | 5  | 0.0135  |
| 4010 | MAPK signaling pathway              | 12 | 0.0139  |
| 5160 | Hepatitis C                         | 8  | 0.014   |
| 5416 | Viral myocarditis                   | 5  | 0.0179  |
| 4621 | NOD-like receptor signaling pathway | 5  | 0.019   |
| 3030 | DNA replication                     | 4  | 0.0192  |
| 4145 | Phagosome                           | 8  | 0.0245  |
| 4720 | Long-term potentiation              | 5  | 0.0298  |
| 5203 | Viral carcinogenesis                | 9  | 0.0318  |
| 3430 | Mismatch repair                     | 3  | 0.0396  |
| 3420 | Nucleotide excision repair          | 4  | 0.047   |

---

**Table S3.3.** GO pathway enrichment in downregulated group of RA versus normalcy

| Pathway ID | Pathway description                                                        | Observed<br>gene count | False discovery<br>rate |
|------------|----------------------------------------------------------------------------|------------------------|-------------------------|
| GO.0051246 | Regulation of protein metabolic process                                    | 47                     | 2.89E-07                |
| GO.0071310 | Cellular response to organic substance                                     | 40                     | 3.16E-07                |
| GO.0051240 | Positive regulation of multicellular organismal<br>process                 | 33                     | 7.24E-07                |
| GO.0031325 | Positive regulation of cellular metabolic process                          | 49                     | 8.06E-07                |
| GO.0070848 | Response to growth factor                                                  | 23                     | 8.06E-07                |
| GO.0032268 | Regulation of cellular protein metabolic process                           | 43                     | 9.60E-07                |
| GO.0001568 | Blood vessel development                                                   | 19                     | 1.14E-06                |
| GO.0010628 | Positive regulation of gene expression                                     | 36                     | 1.14E-06                |
| GO.0071363 | Cellular response to growth factor stimulus                                | 22                     | 1.28E-06                |
| GO.0001944 | Vasculature development                                                    | 19                     | 2.01E-06                |
| GO.0051173 | Positive regulation of nitrogen compound<br>metabolic process              | 36                     | 2.02E-06                |
| GO.0051254 | Positive regulation of rna metabolic process                               | 33                     | 2.02E-06                |
| GO.0070887 | Cellular response to chemical stimulus                                     | 42                     | 2.02E-06                |
| GO.0071495 | Cellular response to endogenous stimulus                                   | 27                     | 2.04E-06                |
| GO.0000122 | Negative regulation of transcription from rna<br>polymerase ii promoter    | 23                     | 3.56E-06                |
| GO.0051239 | Regulation of multicellular organismal process                             | 42                     | 3.57E-06                |
| GO.0048513 | Organ development                                                          | 45                     | 3.85E-06                |
| GO.0050793 | Regulation of developmental process                                        | 39                     | 3.85E-06                |
| GO.0080090 | Regulation of primary metabolic process                                    | 69                     | 3.85E-06                |
| GO.0007167 | Enzyme linked receptor protein signaling pathway                           | 25                     | 4.49E-06                |
| GO.0045935 | Positive regulation of nucleobase-containing<br>compound metabolic process | 34                     | 5.66E-06                |
| GO.0010558 | Negative regulation of macromolecule biosynthetic<br>process               | 30                     | 5.87E-06                |
| GO.0071559 | Response to transforming growth factor beta                                | 12                     | 6.04E-06                |
| GO.0010604 | Positive regulation of macromolecule metabolic<br>process                  | 44                     | 6.92E-06                |
| GO.0048523 | Negative regulation of cellular process                                    | 56                     | 6.92E-06                |
| GO.0009893 | Positive regulation of metabolic process                                   | 52                     | 6.93E-06                |
| GO.2000113 | Negative regulation of cellular macromolecule<br>biosynthetic process      | 29                     | 7.43E-06                |
| GO.0010033 | Response to organic substance                                              | 42                     | 7.78E-06                |
| GO.0048514 | Blood vessel morphogenesis                                                 | 16                     | 7.78E-06                |
| GO.0031328 | Positive regulation of cellular biosynthetic process                       | 34                     | 8.57E-06                |
| GO.0019222 | Regulation of metabolic process                                            | 75                     | 8.78E-06                |
| GO.0060255 | Regulation of macromolecule metabolic process                              | 67                     | 1.05E-05                |
| GO.0001655 | Urogenital system development                                              | 14                     | 1.16E-05                |
| GO.0001822 | Kidney development                                                         | 13                     | 1.16E-05                |
| GO.0010605 | Negative regulation of macromolecule metabolic<br>process                  | 39                     | 1.16E-05                |

|            |                                                                         |    |          |
|------------|-------------------------------------------------------------------------|----|----------|
| GO.0045934 | Negative regulation of nucleobase-containing compound metabolic process | 29 | 1.16E-05 |
| GO.0045893 | Positive regulation of transcription                                    |    |          |
| GO.0010557 | Positive regulation of macromolecule biosynthetic process               | 32 | 1.52E-05 |
| GO.0051094 | Positive regulation of developmental process                            | 26 | 1.60E-05 |
| GO.0051253 | Negative regulation of rna metabolic process                            | 27 | 1.70E-05 |
| GO.0072001 | Renal system development                                                | 13 | 1.70E-05 |
| GO.0051591 | Response to camp                                                        | 9  | 1.73E-05 |
| GO.0031323 | Regulation of cellular metabolic process                                | 68 | 1.78E-05 |
| GO.0048522 | Positive regulation of cellular process                                 | 58 | 1.78E-05 |
| GO.0045892 | Negative regulation of transcription                                    |    |          |
| GO.2000112 | Regulation of cellular macromolecule biosynthetic process               | 52 | 1.94E-05 |
| GO.0031326 | Regulation of cellular biosynthetic process                             | 54 | 2.38E-05 |
| GO.1903507 | Negative regulation of nucleic acid-templated transcription             | 26 | 2.38E-05 |
| GO.0031327 | Negative regulation of cellular biosynthetic process                    | 29 | 2.43E-05 |
| GO.0048518 | Positive regulation of biological process                               | 63 | 2.43E-05 |
| GO.0071560 | Cellular response to transforming growth factor beta stimulus           | 11 | 2.45E-05 |
| GO.0031324 | Negative regulation of cellular metabolic process                       | 38 | 2.72E-05 |
| GO.0051172 | Negative regulation of nitrogen compound metabolic process              | 29 | 3.08E-05 |
| GO.0014074 | Response to purine-containing compound                                  | 10 | 3.68E-05 |
| GO.0051270 | Regulation of cellular component movement                               | 20 | 3.92E-05 |
| GO.0061061 | Muscle structure development                                            | 16 | 3.98E-05 |
| GO.0072358 | Cardiovascular system development                                       | 21 | 3.98E-05 |
| GO.0072359 | Circulatory system development                                          | 21 | 3.98E-05 |
| GO.0009892 | Negative regulation of metabolic process                                | 40 | 4.41E-05 |
| GO.0071248 | Cellular response to metal ion                                          | 9  | 4.83E-05 |
| GO.0010468 | Regulation of gene expression                                           | 53 | 5.81E-05 |
| GO.0010941 | Regulation of cell death                                                | 29 | 5.82E-05 |
| GO.0030334 | Regulation of cell migration                                            | 18 | 5.82E-05 |
| GO.0032501 | Multicellular organismal process                                        | 67 | 5.99E-05 |
| GO.0048608 | Reproductive structure development                                      | 15 | 5.99E-05 |
| GO.0001503 | Ossification                                                            | 12 | 6.11E-05 |
| GO.0009889 | Regulation of biosynthetic process                                      | 53 | 6.24E-05 |
| GO.0001657 | Ureteric bud development                                                | 8  | 6.41E-05 |
| GO.0061458 | Reproductive system development                                         | 15 | 6.41E-05 |
| GO.0007275 | Multicellular organismal development                                    | 54 | 6.65E-05 |
| GO.0009719 | Response to endogenous stimulus                                         | 28 | 6.65E-05 |
| GO.0048519 | Negative regulation of biological process                               | 55 | 7.52E-05 |
| GO.0040012 | Regulation of locomotion                                                | 19 | 8.07E-05 |
| GO.0001823 | Mesonephros development                                                 | 8  | 8.28E-05 |
| GO.0048731 | System development                                                      | 49 | 8.29E-05 |

|            |                                                            |    |          |
|------------|------------------------------------------------------------|----|----------|
| GO.0051171 | Regulation of nitrogen compound metabolic process          | 53 | 8.75E-05 |
| GO.0009653 | Anatomical structure morphogenesis                         | 35 | 9.26E-05 |
| GO.0007179 | Transforming growth factor beta receptor signaling pathway | 9  | 0.000123 |
| GO.0009888 | Tissue development                                         | 29 | 0.000123 |
| GO.0042981 | Regulation of apoptotic process                            | 27 | 0.000134 |
| GO.0044707 | Single-multicellular organism process                      | 64 | 0.000134 |
| GO.0006417 | Regulation of translation                                  | 12 | 0.00015  |
| GO.0007166 | Cell surface receptor signaling pathway                    | 34 | 0.000171 |
| GO.0060429 | Epithelium development                                     | 22 | 0.000186 |
| GO.0060548 | Negative regulation of cell death                          | 21 | 0.000215 |
| GO.0048511 | Rhythmic process                                           | 12 | 0.00022  |
| GO.0010629 | Negative regulation of gene expression                     | 27 | 0.00024  |
| GO.0032870 | Cellular response to hormone stimulus                      | 16 | 0.000252 |
| GO.2000026 | Regulation of multicellular organismal development         | 28 | 0.000276 |
| GO.0045168 | Cell-cell signaling involved in cell fate commitment       | 5  | 0.000321 |
| GO.0032970 | Regulation of actin filament-based process                 | 12 | 0.000325 |
| GO.0048145 | Regulation of fibroblast proliferation                     | 7  | 0.000325 |
| GO.0048660 | Regulation of smooth muscle cell proliferation             | 7  | 0.000325 |
| GO.0009628 | Response to abiotic stimulus                               | 23 | 0.000379 |
| GO.0042127 | Regulation of cell proliferation                           | 27 | 0.000379 |
| GO.0051726 | Regulation of cell cycle                                   | 21 | 0.000384 |
| GO.0006355 | Regulation of transcription                                |    |          |
| GO.0002009 | Morphogenesis of an epithelium                             | 14 | 0.000452 |
| GO.0007155 | Cell adhesion                                              | 21 | 0.000461 |
| GO.0045597 | Positive regulation of cell differentiation                | 19 | 0.000461 |
| GO.0048729 | Tissue morphogenesis                                       | 16 | 0.000461 |
| GO.0009968 | Negative regulation of signal transduction                 | 22 | 0.000486 |
| GO.0071504 | Cellular response to heparin                               | 3  | 0.000489 |
| GO.0007399 | Nervous system development                                 | 32 | 0.000513 |
| GO.0042063 | Gliogenesis                                                | 9  | 0.000513 |
| GO.0051493 | Regulation of cytoskeleton organization                    | 13 | 0.000513 |
| GO.0042221 | Response to chemical                                       | 48 | 0.000536 |
| GO.0038095 | Fc-epsilon receptor signaling pathway                      | 9  | 0.000558 |
| GO.0072073 | Kidney epithelium development                              | 8  | 0.00059  |
| GO.0009314 | Response to radiation                                      | 14 | 0.000616 |
| GO.0010001 | Glial cell differentiation                                 | 8  | 0.000616 |
| GO.0048646 | Anatomical structure formation involved in morphogenesis   | 21 | 0.000619 |
| GO.0016477 | Cell migration                                             | 18 | 0.000641 |
| GO.0000956 | Nuclear-transcribed mrna catabolic process                 | 9  | 0.000677 |
| GO.0038093 | Fc receptor signaling pathway                              | 10 | 0.000749 |
| GO.0043066 | Negative regulation of apoptotic process                   | 19 | 0.000766 |

|            |                                                                                        |    |          |
|------------|----------------------------------------------------------------------------------------|----|----------|
| GO.0010608 | Posttranscriptional regulation of gene expression                                      | 12 | 0.000795 |
| GO.0048732 | Gland development                                                                      | 13 | 0.000801 |
|            | Transmembrane receptor protein tyrosine kinase signaling pathway                       | 17 | 0.000909 |
| GO.0007169 | Central nervous system development                                                     | 19 | 0.000909 |
| GO.0010464 | Regulation of mesenchymal cell proliferation                                           | 5  | 0.000953 |
| GO.0043065 | Positive regulation of apoptotic process                                               | 15 | 0.000979 |
|            | Regulation of transcription from rna polymerase ii promoter                            | 28 | 0.000989 |
| GO.0006357 | Response to cytokine                                                                   | 16 | 0.00101  |
| GO.0034097 | Response to nitrogen compound                                                          | 19 | 0.00101  |
| GO.1901698 | Regulation of neuron apoptotic process                                                 | 9  | 0.0011   |
| GO.0043523 | Embryonic morphogenesis                                                                | 15 | 0.00115  |
| GO.0048598 | Response to organic cyclic compound                                                    | 18 | 0.00124  |
| GO.0014070 | Response to mechanical stimulus                                                        | 9  | 0.00139  |
| GO.0009612 | Negative regulation of cell proliferation                                              | 16 | 0.00147  |
| GO.0008285 | Tube development                                                                       | 15 | 0.00159  |
| GO.0035295 | Regulation of actin cytoskeleton organization                                          | 10 | 0.0016   |
| GO.0051252 | Regulation of rna metabolic process                                                    | 44 | 0.00164  |
| GO.0051674 | Localization of cell                                                                   | 18 | 0.00173  |
| GO.0071277 | Cellular response to calcium ion                                                       | 5  | 0.00177  |
| GO.0051128 | Regulation of cellular component organization                                          | 32 | 0.0019   |
| GO.0030510 | Regulation of bmp signaling pathway                                                    | 6  | 0.00192  |
| GO.0042325 | Regulation of phosphorylation                                                          | 23 | 0.00192  |
| GO.0001932 | Regulation of protein phosphorylation                                                  | 22 | 0.00196  |
| GO.0022414 | Reproductive process                                                                   | 22 | 0.00196  |
|            | Regulation of transmembrane receptor protein serine/threonine kinase signaling pathway | 9  | 0.00196  |
| GO.0090092 | Positive regulation of transcription from rna polymerase ii promoter                   | 20 | 0.00199  |
| GO.0045944 | Cell proliferation                                                                     | 16 | 0.002    |
| GO.0008283 | Regulation of heart morphogenesis                                                      | 4  | 0.00207  |
| GO.2000826 | Osteoblast differentiation                                                             | 7  | 0.00214  |
| GO.0001649 | Regulation of nucleobase-containing compound metabolic process                         | 46 | 0.00214  |
| GO.0019219 | Regulation of cell differentiation                                                     | 25 | 0.00214  |
| GO.0045595 | Response to external stimulus                                                          | 29 | 0.00241  |
| GO.0009605 | Anatomical structure development                                                       | 49 | 0.00241  |
| GO.0048856 | Regulation of protein modification process                                             | 26 | 0.00261  |
| GO.0031399 | Negative regulation of protein metabolic process                                       | 20 | 0.00266  |
| GO.0051248 | Nuclear-transcribed mrna catabolic process                                             |    |          |
| GO.0000288 | Transmembrane receptor protein serine/threonine kinase signaling pathway               | 9  | 0.00276  |
| GO.0007178 | Gene expression                                                                        | 48 | 0.00295  |
| GO.0010467 | Muscle organ development                                                               | 10 | 0.003    |
| GO.0007517 | Regulation of response to stimulus                                                     | 42 | 0.003    |
| GO.0048583 |                                                                                        |    |          |

|            |                                                                 |    |         |
|------------|-----------------------------------------------------------------|----|---------|
| GO.0019220 | Regulation of phosphate metabolic process                       | 25 | 0.00302 |
| GO.0033993 | Response to lipid                                               | 17 | 0.00302 |
| GO.0009790 | Embryo development                                              | 19 | 0.00307 |
| GO.0044702 | Single organism reproductive process                            | 20 | 0.00342 |
| GO.0060395 | Smad protein signal transduction                                | 5  | 0.00342 |
| GO.0048146 | Positive regulation of fibroblast proliferation                 | 5  | 0.00366 |
| GO.0048844 | Artery morphogenesis                                            | 5  | 0.00366 |
| GO.0060675 | Ureteric bud morphogenesis                                      | 5  | 0.00366 |
| GO.0010038 | Response to metal ion                                           | 10 | 0.00374 |
| GO.0071496 | Cellular response to external stimulus                          | 10 | 0.00394 |
| GO.0010035 | Response to inorganic substance                                 | 12 | 0.00398 |
| GO.0031128 | Developmental induction                                         | 4  | 0.00398 |
| GO.0090287 | Regulation of cellular response to growth factor stimulus       | 9  | 0.00398 |
| GO.0007420 | Brain development                                               | 15 | 0.0044  |
| GO.1901654 | Response to ketone                                              | 7  | 0.00444 |
| GO.0048662 | Negative regulation of smooth muscle cell proliferation         | 4  | 0.0045  |
| GO.0071396 | Cellular response to lipid                                      | 11 | 0.0046  |
| GO.1901722 | Regulation of cell proliferation involved in kidney development | 3  | 0.00462 |
| GO.0032879 | Regulation of localization                                      | 32 | 0.00463 |
| GO.0006402 | Mrna catabolic process                                          | 8  | 0.00517 |
| GO.0048015 | Phosphatidylinositol-mediated signaling                         | 7  | 0.00518 |
| GO.0071383 | Cellular response to steroid hormone stimulus                   | 7  | 0.00518 |
| GO.0042490 | Mechanoreceptor differentiation                                 | 5  | 0.00519 |
| GO.0040011 | Locomotion                                                      | 21 | 0.00521 |
| GO.0044238 | Primary metabolic process                                       | 80 | 0.00574 |
| GO.0014033 | Neural crest cell differentiation                               | 5  | 0.00597 |
| GO.0051492 | Regulation of stress fiber assembly                             | 5  | 0.00597 |
| GO.0030154 | Cell differentiation                                            | 39 | 0.00599 |
| GO.0051704 | Multi-organism process                                          | 31 | 0.00615 |
| GO.0007548 | Sex differentiation                                             | 9  | 0.00633 |
| GO.0060840 | Artery development                                              | 5  | 0.00635 |
| GO.0098602 | Single organism cell adhesion                                   | 12 | 0.00676 |
| GO.0048585 | Negative regulation of response to stimulus                     | 22 | 0.00691 |
| GO.0050679 | Positive regulation of epithelial cell proliferation            | 7  | 0.00763 |
| GO.0043583 | Ear development                                                 | 8  | 0.00774 |
| GO.0035556 | Intracellular signal transduction                               | 27 | 0.00828 |
| GO.0060322 | Head development                                                | 15 | 0.00835 |
| GO.0010243 | Response to organonitrogen compound                             | 16 | 0.00836 |
| GO.0023051 | Regulation of signaling                                         | 35 | 0.00859 |
| GO.0032269 | Negative regulation of cellular protein metabolic process       | 18 | 0.0086  |
| GO.0007173 | Epidermal growth factor receptor signaling pathway              | 8  | 0.00863 |

|            |                                                                   |    |         |
|------------|-------------------------------------------------------------------|----|---------|
| GO.0045667 | Regulation of osteoblast differentiation                          | 6  | 0.00863 |
| GO.0043170 | Macromolecule metabolic process                                   | 71 | 0.00869 |
| GO.0072176 | Nephric duct development                                          | 3  | 0.0088  |
|            | Positive regulation of extracellular matrix organization          | 3  | 0.0088  |
| GO.1903055 | Chordate embryonic development                                    | 14 | 0.00885 |
| GO.0022612 | Gland morphogenesis                                               | 6  | 0.0089  |
| GO.0051145 | Smooth muscle cell differentiation                                | 4  | 0.00915 |
| GO.0051496 | Positive regulation of stress fiber assembly                      | 4  | 0.00915 |
| GO.0006807 | Nitrogen compound metabolic process                               | 58 | 0.00941 |
| GO.0060197 | Cloacal septation                                                 | 2  | 0.0097  |
| GO.0072190 | Ureter urothelium development                                     | 2  | 0.0097  |
| GO.0072191 | Ureter smooth muscle development                                  | 2  | 0.0097  |
| GO.0072193 | Ureter smooth muscle cell differentiation                         | 2  | 0.0097  |
| GO.0072197 | Ureter morphogenesis                                              | 2  | 0.0097  |
| GO.0016070 | Rna metabolic process                                             | 42 | 0.0101  |
| GO.0030224 | Monocyte differentiation                                          | 3  | 0.0101  |
| GO.0032502 | Developmental process                                             | 51 | 0.0101  |
| GO.0045995 | Regulation of embryonic development                               | 6  | 0.0101  |
| GO.0051592 | Response to calcium ion                                           | 6  | 0.0101  |
| GO.1900153 | Positive regulation of nuclear-transcribed mrna catabolic process |    |         |
| GO.1901215 | Negative regulation of neuron death                               | 7  | 0.0101  |
| GO.0040007 | Growth                                                            | 11 | 0.0104  |
|            | Positive regulation of cellular component biogenesis              | 10 | 0.0104  |
| GO.0044089 | Negative regulation of cellular component movement                | 8  | 0.0104  |
| GO.0051271 | Regulation of stem cell differentiation                           | 6  | 0.0104  |
| GO.2000736 | Heart morphogenesis                                               | 8  | 0.0107  |
| GO.0003007 | Biosynthetic process                                              | 52 | 0.011   |
| GO.0009058 | Cellular nitrogen compound metabolic process                      | 55 | 0.0112  |
| GO.0034641 | Response to drug                                                  | 11 | 0.0118  |
| GO.0042493 | Regulation of cell proliferation involved in heart morphogenesis  | 3  | 0.0118  |
| GO.2000136 | Cellular macromolecule metabolic process                          | 66 | 0.0121  |
| GO.0044260 | Regulation of protein kinase b signaling                          | 6  | 0.0123  |
| GO.0051896 | Positive regulation of kidney development                         | 4  | 0.0123  |
| GO.0090184 | Peripheral nervous system development                             | 5  | 0.0129  |
| GO.0007422 | Regulation of gliogenesis                                         | 5  | 0.0129  |
| GO.0014013 | Neurotrophin trk receptor signaling pathway                       | 9  | 0.0129  |
| GO.0048011 | Cellular developmental process                                    | 39 | 0.0129  |
| GO.0048869 | Organic substance biosynthetic process                            | 51 | 0.0129  |
| GO.1901576 | Prostate gland development                                        | 4  | 0.0132  |
| GO.0030850 | Positive regulation of cellular protein metabolic process         | 21 | 0.0132  |
| GO.0032270 | Response to interleukin-1                                         | 5  | 0.0134  |
| GO.0070555 |                                                                   |    |         |



|            |                                                        |    |        |
|------------|--------------------------------------------------------|----|--------|
| GO.0065009 | Regulation of molecular function                       | 34 | 0.0136 |
| GO.0072012 | Glomerulus vasculature development                     | 3  | 0.0136 |
| GO.0022008 | Neurogenesis                                           | 22 | 0.0137 |
| GO.0002040 | Sprouting angiogenesis                                 | 4  | 0.0141 |
| GO.0030198 | Extracellular matrix organization                      | 10 | 0.0141 |
| GO.0016337 | Single organismal cell-cell adhesion                   | 11 | 0.0142 |
| GO.0044767 | Single-organism developmental process                  | 50 | 0.0145 |
| GO.0051893 | Regulation of focal adhesion assembly                  | 4  | 0.0151 |
| GO.0060485 | Mesenchyme development                                 | 7  | 0.0151 |
| GO.0045165 | Cell fate commitment                                   | 8  | 0.0158 |
| GO.0001656 | Metanephros development                                | 5  | 0.0161 |
| GO.0035272 | Exocrine system development                            | 4  | 0.0161 |
| GO.0035844 | Cloaca development                                     | 2  | 0.0161 |
| GO.0040013 | Negative regulation of locomotion                      | 8  | 0.0161 |
| GO.0060235 | Lens induction in camera-type eye                      | 2  | 0.0161 |
| GO.0051179 | Localization                                           | 47 | 0.0171 |
| GO.0032774 | Rna biosynthetic process                               | 35 | 0.0173 |
| GO.0048839 | Inner ear development                                  | 7  | 0.0173 |
| GO.0009966 | Regulation of signal transduction                      | 31 | 0.0175 |
| GO.0010646 | Regulation of cell communication                       | 35 | 0.0175 |
| GO.0071453 | Cellular response to oxygen levels                     | 6  | 0.0176 |
| GO.0030324 | Lung development                                       | 7  | 0.0181 |
| GO.0009725 | Response to hormone                                    | 16 | 0.0182 |
| GO.0044085 | Cellular component biogenesis                          | 27 | 0.0183 |
| GO.0009991 | Response to extracellular stimulus                     | 11 | 0.0185 |
| GO.0009059 | Macromolecule biosynthetic process                     | 43 | 0.0188 |
| GO.0019438 | Aromatic compound biosynthetic process                 | 38 | 0.019  |
| GO.0009887 | Organ morphogenesis                                    | 16 | 0.0196 |
| GO.0050794 | Regulation of cellular process                         | 81 | 0.0197 |
| GO.0072273 | Metanephric nephron morphogenesis                      | 3  | 0.0197 |
| GO.0017038 | Protein import                                         | 6  | 0.0199 |
| GO.0030323 | Respiratory tube development                           | 7  | 0.0199 |
| GO.0043524 | Negative regulation of neuron apoptotic process        | 6  | 0.0199 |
| GO.0065008 | Regulation of biological quality                       | 36 | 0.0199 |
| GO.0006366 | Transcription from rna polymerase ii promoter          | 15 | 0.0201 |
| GO.0019538 | Protein metabolic process                              | 44 | 0.0207 |
| GO.0043525 | Positive regulation of neuron apoptotic process        | 4  | 0.0207 |
| GO.0060711 | Labyrinthine layer development                         | 4  | 0.0207 |
|            | Cellular response to fibroblast growth factor stimulus | 7  | 0.0209 |
| GO.0044344 |                                                        | 7  | 0.0209 |
| GO.0007219 | Notch signaling pathway                                | 6  | 0.0212 |
| GO.0044403 | Symbiosis                                              |    |        |
| GO.1903706 | Regulation of hemopoiesis                              | 9  | 0.0216 |
| GO.0050789 | Regulation of biological process                       | 83 | 0.0221 |
| GO.0097305 | Response to alcohol                                    | 9  | 0.0221 |
| GO.0006468 | Protein phosphorylation                                | 15 | 0.0224 |

|            |                                                     |    |        |
|------------|-----------------------------------------------------|----|--------|
| GO.0008284 | Positive regulation of cell proliferation           | 15 | 0.0224 |
| GO.0019439 | Aromatic compound catabolic process                 | 10 | 0.0224 |
| GO.0030336 | Negative regulation of cell migration               | 7  | 0.0224 |
| GO.0040008 | Regulation of growth                                | 13 | 0.0226 |
| GO.0010891 | Negative regulation of sequestering of triglyceride | 2  | 0.0231 |
| GO.0016032 | Viral process                                       | 14 | 0.0231 |
|            | Nucleobase-containing compound biosynthetic         |    |        |
| GO.0034654 | process                                             | 37 | 0.0231 |
| GO.0042692 | Muscle cell differentiation                         | 8  | 0.0231 |
| GO.0061009 | Common bile duct development                        | 2  | 0.0231 |
|            | Regulation of branching involved in lung            |    |        |
| GO.0061046 | morphogenesis                                       | 2  | 0.0231 |
| GO.0044237 | Cellular metabolic process                          | 76 | 0.0237 |
| GO.0044708 | Single-organism behavior                            | 10 | 0.0237 |
| GO.0006084 | Acetyl-coa metabolic process                        | 3  | 0.0239 |
| GO.0043488 | Regulation of mrna stability                        | 4  | 0.0241 |
| GO.0001892 | Embryonic placenta development                      | 5  | 0.0245 |
| GO.0048589 | Developmental growth                                | 9  | 0.0245 |
| GO.0034504 | Protein localization to nucleus                     | 6  | 0.0249 |
| GO.0044249 | Cellular biosynthetic process                       | 49 | 0.025  |
| GO.0008406 | Gonad development                                   | 7  | 0.0252 |
| GO.0010634 | Positive regulation of epithelial cell migration    | 5  | 0.0252 |
| GO.0014032 | Neural crest cell development                       | 4  | 0.0252 |
| GO.0051247 | Positive regulation of protein metabolic process    | 21 | 0.0252 |
| GO.0060113 | Inner ear receptor cell differentiation             | 4  | 0.0252 |
| GO.0071347 | Cellular response to interleukin-1                  | 4  | 0.0252 |
| GO.0000165 | Mapk cascade                                        | 7  | 0.0258 |
| GO.0007623 | Circadian rhythm                                    | 6  | 0.026  |
| GO.0044087 | Regulation of cellular component biogenesis         | 13 | 0.026  |
| GO.0090304 | Nucleic acid metabolic process                      | 44 | 0.026  |
| GO.0044271 | Cellular nitrogen compound biosynthetic process     | 40 | 0.0263 |
| GO.1901360 | Organic cyclic compound metabolic process           | 51 | 0.0263 |
| GO.0045685 | Regulation of glial cell differentiation            | 4  | 0.0264 |
| GO.0048545 | Response to steroid hormone                         | 10 | 0.0264 |
| GO.0048546 | Digestive tract morphogenesis                       | 4  | 0.0264 |
| GO.0009416 | Response to light stimulus                          | 9  | 0.0276 |
| GO.0098609 | Cell-cell adhesion                                  | 12 | 0.0276 |
| GO.0045137 | Development of primary sexual characteristics       | 7  | 0.0281 |
| GO.0000289 | Nuclear-transcribed mrna poly(a) tail shortening    | 3  | 0.0287 |
| GO.0001890 | Placenta development                                | 6  | 0.0291 |
| GO.0030155 | Regulation of cell adhesion                         | 12 | 0.0301 |
| GO.0042327 | Positive regulation of phosphorylation              | 15 | 0.0302 |
| GO.0000904 | Cell morphogenesis involved in differentiation      | 13 | 0.0305 |
| GO.0014909 | Smooth muscle cell migration                        | 2  | 0.0305 |
| GO.0030335 | Positive regulation of cell migration               | 9  | 0.0305 |
| GO.0045596 | Negative regulation of cell differentiation         | 13 | 0.0305 |

|            |                                                                                   |    |        |
|------------|-----------------------------------------------------------------------------------|----|--------|
| GO.0072201 | Negative regulation of mesenchymal cell proliferation                             | 2  | 0.0305 |
| GO.1901724 | Positive regulation of cell proliferation involved in kidney development          | 2  | 0.0305 |
| GO.0006928 | Movement of cell or subcellular component                                         | 20 | 0.0306 |
| GO.0050678 | Regulation of epithelial cell proliferation                                       | 8  | 0.0306 |
| GO.1901362 | Organic cyclic compound biosynthetic process                                      | 38 | 0.0307 |
| GO.0001933 | Negative regulation of protein phosphorylation                                    | 9  | 0.0309 |
| GO.0010762 | Regulation of fibroblast migration                                                | 3  | 0.0309 |
| GO.0021885 | Forebrain cell migration                                                          | 4  | 0.0309 |
| GO.0051716 | Cellular response to stimulus                                                     | 58 | 0.0309 |
| GO.0060740 | Prostate gland epithelium morphogenesis                                           | 3  | 0.0309 |
| GO.0072215 | Regulation of metanephros development                                             | 3  | 0.0309 |
| GO.1901700 | Response to oxygen-containing compound                                            | 20 | 0.0309 |
| GO.0006605 | Protein targeting                                                                 | 10 | 0.0312 |
| GO.0030900 | Forebrain development                                                             | 9  | 0.0314 |
| GO.0031400 | Negative regulation of protein modification process                               | 12 | 0.0314 |
| GO.0048699 | Generation of neurons                                                             | 20 | 0.0318 |
| GO.0043618 | Regulation of transcription from rna polymerase ii promoter in response to stress | 4  | 0.0321 |
| GO.0042698 | Ovulation cycle                                                                   | 5  | 0.0329 |
| GO.0051170 | Nuclear import                                                                    | 5  | 0.0329 |
| GO.0060284 | Regulation of cell development                                                    | 14 | 0.0331 |
| GO.0003151 | Outflow tract morphogenesis                                                       | 4  | 0.0332 |
| GO.0003338 | Metanephros morphogenesis                                                         | 3  | 0.0332 |
| GO.0030855 | Epithelial cell differentiation                                                   | 11 | 0.0332 |
| GO.0031589 | Cell-substrate adhesion                                                           | 6  | 0.0332 |
| GO.0043401 | Steroid hormone mediated signaling pathway                                        | 4  | 0.0332 |
| GO.0045936 | Negative regulation of phosphate metabolic process                                | 11 | 0.0332 |
| GO.0055025 | Positive regulation of cardiac muscle tissue development                          | 3  | 0.0332 |
| GO.1901361 | Organic cyclic compound catabolic process                                         | 10 | 0.0332 |
| GO.2000027 | Regulation of organ morphogenesis                                                 | 6  | 0.0332 |
| GO.2001022 | Positive regulation of response to dna damage stimulus                            | 4  | 0.0332 |
| GO.0051495 | Positive regulation of cytoskeleton organization                                  | 6  | 0.0337 |
| GO.0090090 | Negative regulation of canonical wnt signaling pathway                            | 6  | 0.0337 |
| GO.0034645 | Cellular macromolecule biosynthetic process                                       | 41 | 0.0347 |
| GO.0050790 | Regulation of catalytic activity                                                  | 28 | 0.035  |
| GO.0060537 | Muscle tissue development                                                         | 8  | 0.035  |
| GO.0060541 | Respiratory system development                                                    | 7  | 0.0353 |
| GO.0048147 | Negative regulation of fibroblast proliferation                                   | 3  | 0.0361 |
| GO.0061037 | Negative regulation of cartilage development                                      | 3  | 0.0361 |

|            |                                                                  |    |        |
|------------|------------------------------------------------------------------|----|--------|
| GO.0051052 | Regulation of dna metabolic process                              | 8  | 0.0362 |
| GO.0071702 | Organic substance transport                                      | 25 | 0.0362 |
| GO.0072594 | Establishment of protein localization to organelle               | 9  | 0.0362 |
| GO.0045859 | Regulation of protein kinase activity                            | 13 | 0.0375 |
| GO.0007154 | Cell communication                                               | 51 | 0.0376 |
| GO.0031668 | Cellular response to extracellular stimulus                      | 7  | 0.0376 |
| GO.0032504 | Multicellular organism reproduction                              | 14 | 0.0376 |
| GO.0032808 | Lacrimal gland development                                       | 2  | 0.0376 |
| GO.0045937 | Positive regulation of phosphate metabolic process               | 16 | 0.0376 |
| GO.0046942 | Carboxylic acid transport                                        | 7  | 0.0376 |
| GO.0048709 | Oligodendrocyte differentiation                                  | 4  | 0.0376 |
| GO.0060687 | Regulation of branching involved in prostate gland morphogenesis | 2  | 0.0376 |
|            | Regulation of glomerular mesangial cell proliferation            |    |        |
| GO.0072124 | Metanephric collecting duct development                          | 2  | 0.0376 |
| GO.0072205 | Organic substance metabolic process                              | 2  | 0.0376 |
| GO.0071704 | Positive regulation of glial cell differentiation                | 77 | 0.0378 |
| GO.0045687 | Regulation of oligodendrocyte differentiation                    | 3  | 0.0381 |
| GO.0048713 | Prostate gland morphogenesis                                     | 3  | 0.0381 |
| GO.0060512 | Neural tube development                                          | 3  | 0.0381 |
| GO.0021915 | Tube morphogenesis                                               | 6  | 0.0384 |
| GO.0035239 | System process                                                   | 9  | 0.0388 |
| GO.0003008 | Neuroepithelial cell differentiation                             | 23 | 0.0389 |
| GO.0060563 | Regulation of sequence-specific dna binding                      | 4  | 0.0389 |
| GO.0051090 | transcription factor activity                                    | 9  | 0.0399 |
| GO.0022607 | Cellular component assembly                                      | 24 | 0.0403 |
| GO.0048568 | Embryonic organ development                                      | 10 | 0.0406 |
| GO.0002065 | Columnar/cuboidal epithelial cell differentiation                | 5  | 0.0408 |
| GO.0072078 | Nephron tubule morphogenesis                                     | 4  | 0.0408 |
| GO.0003156 | Regulation of organ formation                                    | 3  | 0.041  |
| GO.0006950 | Response to stress                                               | 38 | 0.041  |
| GO.0070849 | Response to epidermal growth factor                              | 3  | 0.041  |
| GO.0071345 | Cellular response to cytokine stimulus                           | 11 | 0.0414 |
| GO.0070482 | Response to oxygen levels                                        | 8  | 0.0418 |
| GO.0006351 | Transcription                                                    |    |        |
| GO.0072028 | Nephron morphogenesis                                            | 4  | 0.0424 |
| GO.0006725 | Cellular aromatic compound metabolic process                     | 48 | 0.0425 |
| GO.0001701 | In utero embryonic development                                   | 9  | 0.0426 |
| GO.0008543 | Fibroblast growth factor receptor signaling pathway              | 6  | 0.0429 |
|            | Macromolecule localization                                       |    |        |
| GO.0033036 | Metanephric nephron development                                  | 26 | 0.0439 |
| GO.0072210 | Negative regulation of map kinase activity                       | 3  | 0.0441 |
| GO.0043407 | Response to acid chemical                                        | 4  | 0.0443 |
| GO.0001101 | Female sex differentiation                                       | 8  | 0.0446 |
| GO.0046660 |                                                                  | 5  | 0.0446 |

|            |                                                 |    |        |
|------------|-------------------------------------------------|----|--------|
| GO.0033365 | Protein localization to organelle               | 11 | 0.0449 |
| GO.0042447 | Hormone catabolic process                       | 2  | 0.0451 |
| GO.0071455 | Cellular response to hyperoxia                  | 2  | 0.0451 |
| GO.0072282 | Metanephric nephron tubule morphogenesis        | 2  | 0.0451 |
| GO.0001525 | Angiogenesis                                    | 8  | 0.0457 |
| GO.0001934 | Positive regulation of protein phosphorylation  | 14 | 0.0457 |
| GO.0002761 | Regulation of myeloid leukocyte differentiation | 5  | 0.0457 |
| GO.0071229 | Cellular response to acid chemical              | 6  | 0.0457 |
| GO.1901564 | Organonitrogen compound metabolic process       | 22 | 0.0457 |
| GO.1901701 | Cellular response to oxygen-containing compound | 14 | 0.0457 |
| GO.0048762 | Mesenchymal cell differentiation                | 5  | 0.047  |
| GO.0060674 | Placenta blood vessel development               | 3  | 0.047  |
| GO.2000648 | Positive regulation of stem cell proliferation  | 4  | 0.0478 |
| GO.0033043 | Regulation of organelle organization            | 17 | 0.0493 |
| GO.0065007 | Biological regulation                           | 83 | 0.0493 |
| GO.0003279 | Cardiac septum development                      | 4  | 0.05   |
| GO.0071456 | Cellular response to hypoxia                    | 5  | 0.05   |

---

**Table S3.4.** KEGG pathway enrichment in downregulated group of RA versus normalcy

| Pathway ID | Pathway description        | Observed gene count | False discovery rate |
|------------|----------------------------|---------------------|----------------------|
| 4010       | MAPK signaling pathway     | 13                  | 1.83E-05             |
| 4380       | Osteoclast differentiation | 9                   | 5.90E-05             |
| 5200       | Pathways in cancer         | 12                  | 0.000589             |
| 4151       | PI3K-Akt signaling pathway | 11                  | 0.00378              |
| 4915       | Estrogen signaling pathway | 6                   | 0.00437              |
| 4152       | AMPK signaling pathway     | 6                   | 0.0141               |
| 4012       | ErbB signaling pathway     | 5                   | 0.0173               |
| 5166       | HTLV-I infection           | 8                   | 0.0235               |
| 61         | Fatty acid biosynthesis    | 2                   | 0.0267               |
| 4668       | TNF signaling pathway      | 5                   | 0.0359               |
| 5031       | Amphetamine addiction      | 4                   | 0.0359               |
| 5205       | Proteoglycans in cancer    | 7                   | 0.0359               |
| 4520       | Adherens junction          | 4                   | 0.0435               |

**Table S3.5.** GO pathway enrichment in upregulated group of OA versus normalcy

| Pathway ID | Pathway description                                    | Observed<br>gene count | False<br>discovery rate |
|------------|--------------------------------------------------------|------------------------|-------------------------|
| GO.0006950 | Response to stress                                     | 74                     | 0.00183                 |
| GO.0016265 | Death                                                  | 35                     | 0.00199                 |
| GO.0065008 | Regulation of biological quality                       | 66                     | 0.00199                 |
| GO.0016042 | Lipid catabolic process                                | 15                     | 0.00223                 |
| GO.0006629 | Lipid metabolic process                                | 33                     | 0.00229                 |
| GO.0008219 | Cell death                                             | 34                     | 0.00229                 |
| GO.0012501 | Programmed cell death                                  | 33                     | 0.00254                 |
| GO.0002376 | Immune system process                                  | 48                     | 0.0039                  |
| GO.0006915 | Apoptotic process                                      | 32                     | 0.0039                  |
| GO.0032880 | Regulation of protein localization                     | 29                     | 0.0039                  |
| GO.1901698 | Response to nitrogen compound                          | 28                     | 0.0039                  |
| GO.0010243 | Response to organonitrogen compound                    | 26                     | 0.00473                 |
| GO.0048584 | Positive regulation of response to stimulus            | 46                     | 0.00473                 |
| GO.0070887 | Cellular response to chemical stimulus                 | 52                     | 0.00473                 |
| GO.0071496 | Cellular response to external stimulus                 | 15                     | 0.00473                 |
| GO.0016477 | Cell migration                                         | 25                     | 0.00607                 |
| GO.0010033 | Response to organic substance                          | 54                     | 0.00683                 |
| GO.0044710 | Single-organism metabolic process                      | 78                     | 0.0124                  |
| GO.0031330 | Negative regulation of cellular catabolic<br>process   | 10                     | 0.013                   |
| GO.0070201 | Regulation of establishment of protein<br>localization | 25                     | 0.0131                  |
| GO.0008610 | Lipid biosynthetic process                             | 19                     | 0.0145                  |
| GO.0071310 | Cellular response to organic substance                 | 43                     | 0.0149                  |
| GO.0002684 | Positive regulation of immune system<br>process        | 25                     | 0.0151                  |
| GO.0006928 | Movement of cell or subcellular component              | 34                     | 0.0151                  |
| GO.0042981 | Regulation of apoptotic process                        | 35                     | 0.0151                  |
| GO.0051674 | Localization of cell                                   | 25                     | 0.0151                  |
| GO.1901700 | Response to oxygen-containing compound                 | 34                     | 0.0151                  |
| GO.0001775 | Cell activation                                        | 21                     | 0.0159                  |
| GO.0009895 | Negative regulation of catabolic process               | 11                     | 0.0159                  |
| GO.0044281 | Small molecule metabolic process                       | 47                     | 0.0159                  |
| GO.0050878 | Regulation of body fluid levels                        | 22                     | 0.0159                  |
| GO.0055114 | Oxidation-reduction process                            | 28                     | 0.0159                  |
| GO.0051128 | Regulation of cellular component<br>organization       | 47                     | 0.016                   |
| GO.0042127 | Regulation of cell proliferation                       | 36                     | 0.017                   |
| GO.0010941 | Regulation of cell death                               | 36                     | 0.0173                  |
| GO.0060341 | Regulation of cellular localization                    | 31                     | 0.0198                  |
| GO.0044723 | Single-organism carbohydrate metabolic<br>process      | 20                     | 0.0199                  |

|            |                                                                                           |    |        |
|------------|-------------------------------------------------------------------------------------------|----|--------|
| GO.0006955 | Immune response                                                                           | 33 | 0.0208 |
| GO.0044255 | Cellular lipid metabolic process                                                          | 24 | 0.0211 |
| GO.0044711 | Single-organism biosynthetic process                                                      | 33 | 0.0211 |
| GO.0097529 | Myeloid leukocyte migration                                                               | 7  | 0.0213 |
| GO.0008104 | Protein localization                                                                      | 39 | 0.0221 |
| GO.0061024 | Membrane organization                                                                     | 25 | 0.0228 |
| GO.0042493 | Response to drug                                                                          | 16 | 0.025  |
| GO.0006952 | Defense response                                                                          | 34 | 0.026  |
| GO.0033036 | Macromolecule localization                                                                | 44 | 0.026  |
| GO.0044242 | Cellular lipid catabolic process                                                          | 9  | 0.026  |
| GO.0044282 | Small molecule catabolic process                                                          | 12 | 0.026  |
| GO.0044712 | Single-organism catabolic process                                                         | 25 | 0.026  |
| GO.0030155 | Regulation of cell adhesion                                                               | 19 | 0.0278 |
| GO.0009967 | Positive regulation of signal transduction                                                | 32 | 0.0303 |
| GO.0051223 | Regulation of protein transport                                                           | 22 | 0.0303 |
| GO.0097190 | Apoptotic signaling pathway                                                               | 14 | 0.0303 |
| GO.0034613 | Cellular protein localization                                                             | 29 | 0.0312 |
| GO.0040011 | Locomotion                                                                                | 30 | 0.0312 |
| GO.0045321 | Leukocyte activation                                                                      | 15 | 0.0312 |
|            | Positive regulation of phosphate metabolic process                                        |    |        |
| GO.0045937 |                                                                                           | 26 | 0.0317 |
| GO.0046395 | Carboxylic acid catabolic process                                                         | 10 | 0.0317 |
| GO.0048519 | Negative regulation of biological process                                                 | 75 | 0.0317 |
|            | Regulation of reactive oxygen species biosynthetic process                                |    |        |
| GO.1903426 |                                                                                           | 6  | 0.0317 |
|            | Positive regulation of protein phosphorylation                                            |    |        |
| GO.0001934 |                                                                                           | 23 | 0.0318 |
| GO.0009056 | Catabolic process                                                                         | 39 | 0.0325 |
| GO.0010647 | Positive regulation of cell communication                                                 | 36 | 0.0325 |
| GO.0032879 | Regulation of localization                                                                | 47 | 0.0325 |
| GO.0043113 | Receptor clustering                                                                       | 5  | 0.0325 |
|            | Regulation of multicellular organismal process                                            |    |        |
| GO.0051239 |                                                                                           | 48 | 0.0325 |
|            | Positive regulation of fever generation by positive regulation of prostaglandin secretion |    |        |
| GO.0071812 |                                                                                           | 2  | 0.0325 |
|            | Positive regulation of erk1 and erk2 cascade via tnfsf11-mediated signaling               |    |        |
| GO.0071848 |                                                                                           | 2  | 0.0325 |
| GO.1901575 | Organic substance catabolic process                                                       | 35 | 0.0325 |
| GO.0048522 | Positive regulation of cellular process                                                   | 76 | 0.0326 |
| GO.0048583 | Regulation of response to stimulus                                                        | 62 | 0.0326 |
| GO.0009611 | Response to wounding                                                                      | 22 | 0.0327 |
| GO.0030162 | Regulation of proteolysis                                                                 | 22 | 0.0327 |
| GO.0009719 | Response to endogenous stimulus                                                           | 33 | 0.0336 |
| GO.0051046 | Regulation of secretion                                                                   | 20 | 0.0336 |
| GO.0051050 | Positive regulation of transport                                                          | 24 | 0.0336 |



|            |                                                           |    |        |
|------------|-----------------------------------------------------------|----|--------|
| GO.0051641 | Cellular localization                                     | 44 | 0.0336 |
| GO.1903827 | Regulation of cellular protein localization               | 17 | 0.0336 |
| GO.0051701 | Interaction with host                                     | 8  | 0.0359 |
| GO.0002682 | Regulation of immune system process                       | 32 | 0.0373 |
| GO.0050900 | Leukocyte migration                                       | 11 | 0.0381 |
|            | Carbohydrate derivative biosynthetic process              |    |        |
| GO.1901137 |                                                           | 19 | 0.0389 |
| GO.0001932 | Regulation of protein phosphorylation                     | 29 | 0.0397 |
| GO.0048518 | Positive regulation of biological process                 | 84 | 0.0399 |
|            | Positive regulation of response to external stimulus      |    |        |
| GO.0032103 |                                                           | 14 | 0.0407 |
| GO.0042327 | Positive regulation of phosphorylation                    | 23 | 0.0407 |
| GO.1901135 | Carbohydrate derivative metabolic process                 | 26 | 0.041  |
| GO.0030595 | Leukocyte chemotaxis                                      | 7  | 0.042  |
| GO.0001941 | Postsynaptic membrane organization                        | 4  | 0.0428 |
| GO.0002696 | Positive regulation of leukocyte activation               | 11 | 0.0428 |
| GO.0005975 | Carbohydrate metabolic process                            | 22 | 0.0428 |
| GO.0032386 | Regulation of intracellular transport                     | 18 | 0.0428 |
| GO.0044248 | Cellular catabolic process                                | 33 | 0.0446 |
| GO.0023056 | Positive regulation of signaling                          | 33 | 0.0455 |
| GO.0045785 | Positive regulation of cell adhesion                      | 13 | 0.0455 |
| GO.0001774 | Microglial cell activation                                | 3  | 0.0461 |
| GO.0072330 | Monocarboxylic acid biosynthetic process                  | 9  | 0.0461 |
|            | Regulation of intracellular signal transduction           |    |        |
| GO.1902531 |                                                           | 32 | 0.0461 |
| GO.0010646 | Regulation of cell communication                          | 54 | 0.0491 |
|            | Negative regulation of multicellular organismal process   |    |        |
| GO.0051241 |                                                           | 25 | 0.0491 |
|            | Negative regulation of cellular protein catabolic process |    |        |
| GO.1903363 |                                                           | 6  | 0.0491 |
| GO.2001233 | Regulation of apoptotic signaling pathway                 | 14 | 0.0494 |

---

**Table S3.6.** KEGG pathway enrichment in upregulated group of OA versus normalcy

| Pathway ID | Pathway description | Observed<br>gene count | False discovery<br>rate |
|------------|---------------------|------------------------|-------------------------|
| 1100       | Metabolic pathways  | 35                     | 0.00138                 |
| 4142       | Lysosome            | 9                      | 0.00458                 |

**Table S3.7.** GO pathway enrichment in downregulated group of OA versus normalcy

| <b>Pathway ID</b> | <b>Pathway description</b>                                              | <b>Observed<br/>gene count</b> | <b>False<br/>discovery rate</b> |
|-------------------|-------------------------------------------------------------------------|--------------------------------|---------------------------------|
| GO.0009893        | Positive regulation of metabolic process                                | 59                             | 9.33E-11                        |
| GO.0010604        | Positive regulation of macromolecule metabolic process                  | 50                             | 2.60E-10                        |
| GO.0031325        | Positive regulation of cellular metabolic process                       | 51                             | 4.52E-10                        |
| GO.0071310        | Cellular response to organic substance                                  | 41                             | 4.52E-10                        |
| GO.0010033        | Response to organic substance                                           | 47                             | 6.61E-10                        |
| GO.0048522        | Positive regulation of cellular process                                 | 61                             | 1.66E-08                        |
| GO.0051254        | Positive regulation of rna metabolic process                            | 34                             | 2.19E-08                        |
| GO.0007275        | Multicellular organismal development                                    | 58                             | 3.62E-08                        |
| GO.0048518        | Positive regulation of biological process                               | 65                             | 3.62E-08                        |
| GO.0070887        | Cellular response to chemical stimulus                                  | 42                             | 3.62E-08                        |
| GO.0007165        | Signal transduction                                                     | 62                             | 4.06E-08                        |
| GO.0051173        | Positive regulation of nitrogen compound metabolic process              | 36                             | 5.36E-08                        |
| GO.0048731        | System development                                                      | 53                             | 5.54E-08                        |
| GO.0010628        | Positive regulation of gene expression                                  | 35                             | 6.81E-08                        |
| GO.0006807        | Nitrogen compound metabolic process                                     | 68                             | 8.02E-08                        |
| GO.0010558        | Negative regulation of macromolecule biosynthetic process               | 31                             | 8.02E-08                        |
| GO.0019222        | Regulation of metabolic process                                         | 73                             | 9.71E-08                        |
| GO.0060255        | Regulation of macromolecule metabolic process                           | 66                             | 9.71E-08                        |
| GO.0031328        | Positive regulation of cellular biosynthetic process                    | 35                             | 1.07E-07                        |
| GO.0080090        | Regulation of primary metabolic process                                 | 66                             | 1.28E-07                        |
| GO.0042221        | Response to chemical                                                    | 53                             | 1.81E-07                        |
| GO.0045934        | Negative regulation of nucleobase-containing compound metabolic process | 30                             | 1.83E-07                        |
| GO.0010557        | Positive regulation of macromolecule biosynthetic process               | 33                             | 2.36E-07                        |
| GO.0044237        | Cellular metabolic process                                              | 85                             | 2.36E-07                        |
| GO.0045944        | Positive regulation of transcription from rna polymerase ii promoter    | 26                             | 2.36E-07                        |
| GO.0034641        | Cellular nitrogen compound metabolic process                            | 64                             | 2.52E-07                        |
| GO.0016070        | Rna metabolic process                                                   | 51                             | 2.58E-07                        |
| GO.0048523        | Negative regulation of cellular process                                 | 54                             | 2.58E-07                        |
| GO.1902680        | Positive regulation of rna biosynthetic process                         | 31                             | 2.58E-07                        |
| GO.0048511        | Rhythmic process                                                        | 15                             | 2.78E-07                        |
| GO.0010468        | Regulation of gene expression                                           | 54                             | 2.97E-07                        |
| GO.0051253        | Negative regulation of rna metabolic process                            | 28                             | 3.02E-07                        |
| GO.0044260        | Cellular macromolecule metabolic process                                | 74                             | 3.26E-07                        |
| GO.0031323        | Regulation of cellular metabolic process                                | 66                             | 3.47E-07                        |
| GO.0044707        | Single-multicellular organism process                                   | 65                             | 3.85E-07                        |

|            |                                                                    |    |          |
|------------|--------------------------------------------------------------------|----|----------|
| GO.0031327 | Negative regulation of cellular biosynthetic process               | 30 | 4.36E-07 |
| GO.0044700 | Single organism signaling                                          | 61 | 5.17E-07 |
| GO.0045893 | Positive regulation of transcription                               |    |          |
| GO.0090304 | Nucleic acid metabolic process                                     | 54 | 5.23E-07 |
| GO.0031326 | Regulation of cellular biosynthetic process                        | 53 | 5.62E-07 |
| GO.0051252 | Regulation of rna metabolic process                                | 49 | 6.31E-07 |
| GO.0051246 | Regulation of protein metabolic process                            | 40 | 6.34E-07 |
| GO.0042325 | Regulation of phosphorylation                                      | 28 | 7.77E-07 |
| GO.0048519 | Negative regulation of biological process                          | 55 | 8.66E-07 |
| GO.0010556 | Regulation of macromolecule biosynthetic process                   | 51 | 8.86E-07 |
| GO.2000113 | Negative regulation of cellular macromolecule biosynthetic process | 28 | 8.86E-07 |
| GO.0048856 | Anatomical structure development                                   | 54 | 8.96E-07 |
| GO.0006139 | Nucleobase-containing compound metabolic process                   | 57 | 9.20E-07 |
| GO.0007154 | Cell communication                                                 | 61 | 9.38E-07 |
| GO.0014074 | Response to purine-containing compound                             | 11 | 9.41E-07 |
| GO.0042981 | Regulation of apoptotic process                                    | 29 | 9.65E-07 |
| GO.0010941 | Regulation of cell death                                           | 30 | 9.98E-07 |
| GO.0014070 | Response to organic cyclic compound                                | 22 | 9.98E-07 |
| GO.1901360 | Organic cyclic compound metabolic process                          | 60 | 9.98E-07 |
| GO.0032502 | Developmental process                                              | 58 | 1.01E-06 |
| GO.0051171 | Regulation of nitrogen compound metabolic process                  | 53 | 1.01E-06 |
| GO.0051716 | Cellular response to stimulus                                      | 67 | 1.01E-06 |
| GO.0010467 | Gene expression                                                    | 53 | 1.05E-06 |
| GO.2000112 | Regulation of cellular macromolecule biosynthetic process          | 50 | 1.13E-06 |
| GO.0032501 | Multicellular organismal process                                   | 65 | 1.20E-06 |
| GO.0008406 | Gonad development                                                  | 12 | 1.26E-06 |
| GO.1903507 | Negative regulation of nucleic acid-templated transcription        | 26 | 1.26E-06 |
| GO.0001822 | Kidney development                                                 | 13 | 1.37E-06 |
| GO.0009889 | Regulation of biosynthetic process                                 | 52 | 1.57E-06 |
| GO.0045137 | Development of primary sexual characteristics                      | 12 | 1.57E-06 |
| GO.0048608 | Reproductive structure development                                 | 16 | 1.57E-06 |
| GO.0001944 | Vasculature development                                            | 17 | 1.59E-06 |
| GO.0010605 | Negative regulation of macromolecule metabolic process             | 37 | 1.59E-06 |
| GO.0044238 | Primary metabolic process                                          | 83 | 1.59E-06 |
| GO.0061458 | Reproductive system development                                    | 16 | 1.72E-06 |
| GO.0019219 | Regulation of nucleobase-containing compound metabolic process     | 50 | 1.73E-06 |
| GO.0044767 | Single-organism developmental process                              | 57 | 1.73E-06 |

|            |                                                             |    |          |
|------------|-------------------------------------------------------------|----|----------|
| GO.0051239 | Regulation of multicellular organismal process              | 38 | 1.90E-06 |
| GO.0001932 | Regulation of protein phosphorylation                       | 26 | 2.01E-06 |
|            | Enzyme linked receptor protein signaling pathway            |    |          |
| GO.0007167 |                                                             | 23 | 2.01E-06 |
| GO.0072001 | Renal system development                                    | 13 | 2.07E-06 |
| GO.0071495 | Cellular response to endogenous stimulus                    | 24 | 2.34E-06 |
| GO.0007166 | Cell surface receptor signaling pathway                     | 35 | 2.38E-06 |
| GO.0033993 | Response to lipid                                           | 21 | 2.68E-06 |
| GO.0046683 | Response to organophosphorus                                | 10 | 2.69E-06 |
| GO.0042326 | Negative regulation of phosphorylation                      | 15 | 2.92E-06 |
| GO.0051591 | Response to camp                                            | 9  | 2.96E-06 |
| GO.0000302 | Response to reactive oxygen species                         | 11 | 3.19E-06 |
| GO.0045892 | Negative regulation of transcription                        |    |          |
| GO.0006355 | Regulation of transcription                                 |    |          |
| GO.0001568 | Blood vessel development                                    | 16 | 4.21E-06 |
| GO.0006913 | Nucleocytoplasmic transport                                 | 12 | 4.22E-06 |
| GO.0010629 | Negative regulation of gene expression                      | 28 | 4.77E-06 |
| GO.0008380 | Rna splicing                                                | 14 | 4.86E-06 |
| GO.0031324 | Negative regulation of cellular metabolic process           | 36 | 4.86E-06 |
|            | Regulation of multicellular organismal development          |    |          |
| GO.2000026 |                                                             | 29 | 5.26E-06 |
| GO.0060548 | Negative regulation of cell death                           | 22 | 5.33E-06 |
| GO.0006979 | Response to oxidative stress                                | 14 | 5.45E-06 |
| GO.0001655 | Urogenital system development                               | 13 | 6.81E-06 |
| GO.0009892 | Negative regulation of metabolic process                    | 38 | 6.91E-06 |
| GO.0043066 | Negative regulation of apoptotic process                    | 21 | 6.95E-06 |
| GO.0042127 | Regulation of cell proliferation                            | 28 | 7.86E-06 |
|            | Regulation of transcription from rna polymerase ii promoter |    |          |
| GO.0006357 |                                                             | 30 | 8.28E-06 |
| GO.0009605 | Response to external stimulus                               | 32 | 8.55E-06 |
| GO.0030154 | Cell differentiation                                        | 43 | 8.56E-06 |
| GO.0009653 | Anatomical structure morphogenesis                          | 34 | 8.97E-06 |
| GO.0009628 | Response to abiotic stimulus                                | 24 | 9.31E-06 |
| GO.0010243 | Response to organonitrogen compound                         | 20 | 1.00E-05 |
| GO.0007548 | Sex differentiation                                         | 12 | 1.01E-05 |
| GO.0009719 | Response to endogenous stimulus                             | 27 | 1.11E-05 |
| GO.0048513 | Organ development                                           | 39 | 1.12E-05 |
| GO.0019220 | Regulation of phosphate metabolic process                   | 28 | 1.20E-05 |
| GO.0043170 | Macromolecule metabolic process                             | 73 | 1.25E-05 |
|            | Negative regulation of phosphate metabolic process          |    |          |
| GO.0045936 |                                                             | 16 | 1.31E-05 |
| GO.1901700 | Response to oxygen-containing compound                      | 26 | 1.31E-05 |
| GO.0016071 | Mrna metabolic process                                      | 17 | 1.44E-05 |
| GO.0034599 | Cellular response to oxidative stress                       | 10 | 1.44E-05 |
| GO.0048514 | Blood vessel morphogenesis                                  | 14 | 1.57E-05 |
| GO.0043549 | Regulation of kinase activity                               | 19 | 1.58E-05 |

|            |                                                                             |    |          |
|------------|-----------------------------------------------------------------------------|----|----------|
| GO.0000398 | Mrna splicing                                                               |    |          |
|            | Positive regulation of multicellular organismal process                     | 26 | 1.65E-05 |
| GO.0051240 | Regulation of cellular protein metabolic process                            | 35 | 1.68E-05 |
| GO.0009059 | Macromolecule biosynthetic process                                          | 48 | 1.75E-05 |
| GO.0071704 | Organic substance metabolic process                                         | 81 | 1.98E-05 |
| GO.0032496 | Response to lipopolysaccharide                                              | 12 | 2.04E-05 |
|            | Negative regulation of transcription from rna polymerase ii promoter        | 19 | 2.57E-05 |
| GO.0045859 | Regulation of protein kinase activity                                       | 18 | 2.62E-05 |
| GO.0051704 | Multi-organism process                                                      | 34 | 2.78E-05 |
| GO.0031399 | Regulation of protein modification process                                  | 28 | 2.85E-05 |
| GO.0006397 | Mrna processing                                                             | 14 | 2.89E-05 |
| GO.0001933 | Negative regulation of protein phosphorylation                              | 13 | 2.91E-05 |
| GO.0032870 | Cellular response to hormone stimulus                                       | 16 | 3.22E-05 |
| GO.0044271 | Cellular nitrogen compound biosynthetic process                             | 45 | 3.56E-05 |
| GO.0051726 | Regulation of cell cycle                                                    | 21 | 3.56E-05 |
| GO.1901698 | Response to nitrogen compound                                               | 20 | 3.56E-05 |
| GO.0007623 | Circadian rhythm                                                            | 9  | 3.70E-05 |
| GO.1901576 | Organic substance biosynthetic process                                      | 54 | 3.70E-05 |
| GO.0006351 | Transcription                                                               |    |          |
| GO.0051338 | Regulation of transferase activity                                          | 20 | 5.04E-05 |
| GO.0009612 | Response to mechanical stimulus                                             | 10 | 5.51E-05 |
| GO.0009888 | Tissue development                                                          | 27 | 5.79E-05 |
| GO.0023057 | Negative regulation of signaling                                            | 23 | 5.91E-05 |
| GO.0034645 | Cellular macromolecule biosynthetic process                                 | 46 | 5.91E-05 |
| GO.0010648 | Negative regulation of cell communication                                   | 23 | 6.74E-05 |
| GO.0050896 | Response to stimulus                                                        | 68 | 6.86E-05 |
| GO.0009991 | Response to extracellular stimulus                                          | 14 | 8.86E-05 |
|            | Regulation of vascular endothelial growth factor receptor signaling pathway | 5  | 9.14E-05 |
| GO.0030947 | Regulation of smooth muscle cell proliferation                              | 7  | 9.15E-05 |
| GO.0008152 | Metabolic process                                                           | 84 | 9.16E-05 |
| GO.0051094 | Positive regulation of developmental process                                | 22 | 9.16E-05 |
| GO.0030334 | Regulation of cell migration                                                | 16 | 0.000101 |
| GO.0003006 | Developmental process involved in reproduction                              | 16 | 0.000103 |
| GO.0033673 | Negative regulation of kinase activity                                      | 10 | 0.00012  |
| GO.0044249 | Cellular biosynthetic process                                               | 52 | 0.000125 |
| GO.0033554 | Cellular response to stress                                                 | 27 | 0.000135 |
| GO.0009968 | Negative regulation of signal transduction                                  | 21 | 0.000155 |
| GO.0034097 | Response to cytokine                                                        | 16 | 0.000166 |
| GO.0043065 | Positive regulation of apoptotic process                                    | 15 | 0.000167 |
| GO.0072358 | Cardiovascular system development                                           | 18 | 0.000167 |
| GO.0072359 | Circulatory system development                                              | 18 | 0.000167 |
| GO.0032922 | Circadian regulation of gene expression                                     | 6  | 0.000169 |
| GO.0040007 | Growth                                                                      | 13 | 0.000169 |

|            |                                                 |    |          |
|------------|-------------------------------------------------|----|----------|
|            | Regulation of transcription from rna polymerase |    |          |
| GO.0043618 | ii promoter in response to stress               | 6  | 0.000169 |
| GO.0050793 | Regulation of developmental process             | 31 | 0.000171 |
| GO.0008284 | Positive regulation of cell proliferation       | 18 | 0.000178 |
| GO.0051270 | Regulation of cellular component movement       | 17 | 0.000186 |
| GO.0031667 | Response to nutrient levels                     | 13 | 0.000204 |
| GO.0008585 | Female gonad development                        | 7  | 0.000207 |
| GO.0006950 | Response to stress                              | 42 | 0.000209 |
| GO.0010035 | Response to inorganic substance                 | 13 | 0.000218 |
| GO.0022414 | Reproductive process                            | 22 | 0.00022  |
|            | Positive regulation of vascular endothelial     |    |          |
| GO.0030949 | growth factor receptor signaling pathway        | 4  | 0.000236 |
| GO.0070848 | Response to growth factor                       | 16 | 0.000261 |
| GO.0001525 | Angiogenesis                                    | 11 | 0.000268 |
| GO.0042542 | Response to hydrogen peroxide                   | 7  | 0.000282 |
|            | Development of primary female sexual            |    |          |
| GO.0046545 | characteristics                                 | 7  | 0.000282 |
| GO.0001701 | In utero embryonic development                  | 12 | 0.000297 |
| GO.0048585 | Negative regulation of response to stimulus     | 23 | 0.00033  |
| GO.1903311 | Regulation of mrna metabolic process            | 7  | 0.000362 |
|            | Regulation of branching morphogenesis of a      |    |          |
| GO.2000172 | nerve                                           | 3  | 0.000395 |
|            | Nucleobase-containing compound biosynthetic     |    |          |
| GO.0034654 | process                                         | 39 | 0.000414 |
| GO.0097305 | Response to alcohol                             | 11 | 0.00043  |
| GO.0006469 | Negative regulation of protein kinase activity  | 9  | 0.000437 |
| GO.1901652 | Response to peptide                             | 13 | 0.000463 |
| GO.0009314 | Response to radiation                           | 13 | 0.000471 |
|            | Transmembrane receptor protein tyrosine kinase  |    |          |
| GO.0007169 | signaling pathway                               | 16 | 0.000487 |
|            | Negative regulation of intracellular signal     |    |          |
| GO.1902532 | transduction                                    | 12 | 0.000506 |
| GO.0046660 | Female sex differentiation                      | 7  | 0.000604 |
| GO.0051168 | Nuclear export                                  | 7  | 0.000604 |
| GO.1901362 | Organic cyclic compound biosynthetic process    | 40 | 0.000636 |
| GO.0006396 | Rna processing                                  | 16 | 0.000641 |
|            | Positive regulation of transcription from rna   |    |          |
| GO.0036003 | polymerase ii promoter in response to stress    | 4  | 0.00067  |
| GO.0048545 | Response to steroid hormone                     | 12 | 0.000671 |
| GO.0071363 | Cellular response to growth factor stimulus     | 15 | 0.000702 |
| GO.1902531 | Regulation of intracellular signal transduction | 23 | 0.000709 |
| GO.0040011 | Locomotion                                      | 21 | 0.000747 |
| GO.0042593 | Glucose homeostasis                             | 8  | 0.000847 |
| GO.0002521 | Leukocyte differentiation                       | 10 | 0.000939 |
| GO.0006405 | Rna export from nucleus                         | 6  | 0.000991 |
| GO.0043525 | Positive regulation of neuron apoptotic process | 5  | 0.00104  |

|            |                                                                                                         |    |         |
|------------|---------------------------------------------------------------------------------------------------------|----|---------|
| GO.0016477 | Cell migration                                                                                          | 16 | 0.0011  |
| GO.0051028 | Mrna transport                                                                                          | 7  | 0.00123 |
| GO.0002520 | Immune system development                                                                               | 14 | 0.00125 |
| GO.0007399 | Nervous system development                                                                              | 28 | 0.00126 |
| GO.0043484 | Regulation of rna splicing                                                                              | 6  | 0.00127 |
|            | Regulation of cellular response to growth factor stimulus                                               | 9  | 0.00127 |
| GO.0090287 | stimulus                                                                                                | 9  | 0.00127 |
| GO.0044702 | Single organism reproductive process                                                                    | 19 | 0.00152 |
| GO.0050794 | Regulation of cellular process                                                                          | 77 | 0.00154 |
| GO.0009725 | Response to hormone                                                                                     | 17 | 0.00155 |
| GO.0043408 | Regulation of mapk cascade                                                                              | 14 | 0.00155 |
| GO.0065008 | Regulation of biological quality                                                                        | 36 | 0.00181 |
| GO.0050684 | Regulation of mrna processing                                                                           | 6  | 0.00184 |
| GO.0006366 | Transcription from rna polymerase ii promoter                                                           | 16 | 0.00186 |
| GO.0001541 | Ovarian follicle development                                                                            | 5  | 0.00191 |
| GO.0060429 | Epithelium development                                                                                  | 18 | 0.00195 |
| GO.0009966 | Regulation of signal transduction                                                                       | 31 | 0.00199 |
| GO.1903706 | Regulation of hemopoiesis                                                                               | 10 | 0.00211 |
| GO.0051247 | Positive regulation of protein metabolic process                                                        | 22 | 0.00217 |
|            | Cellular response to oxygen-containing compound                                                         | 16 | 0.00217 |
| GO.1901701 | compound                                                                                                | 16 | 0.00217 |
| GO.0001775 | Cell activation                                                                                         | 14 | 0.0022  |
| GO.0035556 | Intracellular signal transduction                                                                       | 26 | 0.00221 |
| GO.0045321 | Leukocyte activation                                                                                    | 11 | 0.00221 |
|            | Anatomical structure formation involved in morphogenesis                                                | 18 | 0.00221 |
| GO.0048646 | morphogenesis                                                                                           | 18 | 0.00221 |
| GO.0022008 | Neurogenesis                                                                                            | 22 | 0.00236 |
|            | Regulation of transcription from rna polymerase ii promoter in response to arsenic-containing substance | 2  | 0.00243 |
| GO.0061394 | substance                                                                                               | 2  | 0.00243 |
| GO.0070372 | Regulation of erk1 and erk2 cascade                                                                     | 8  | 0.00243 |
|            | Negative regulation of branching morphogenesis of a nerve                                               | 2  | 0.00243 |
| GO.2000173 | of a nerve                                                                                              | 2  | 0.00243 |
| GO.0007159 | Leukocyte cell-cell adhesion                                                                            | 9  | 0.00247 |
| GO.0048583 | Regulation of response to stimulus                                                                      | 38 | 0.00277 |
| GO.0051674 | Localization of cell                                                                                    | 16 | 0.00277 |
| GO.0042698 | Ovulation cycle                                                                                         | 6  | 0.00288 |
| GO.0051170 | Nuclear import                                                                                          | 6  | 0.00288 |
| GO.0006928 | Movement of cell or subcellular component                                                               | 21 | 0.00294 |
| GO.0002376 | Immune system process                                                                                   | 27 | 0.00295 |
| GO.0045785 | Positive regulation of cell adhesion                                                                    | 10 | 0.00295 |
| GO.0023051 | Regulation of signaling                                                                                 | 33 | 0.00296 |
| GO.0048534 | Hematopoietic or lymphoid organ development                                                             | 13 | 0.00298 |
| GO.0048699 | Generation of neurons                                                                                   | 21 | 0.00308 |
| GO.0032868 | Response to insulin                                                                                     | 9  | 0.00312 |
| GO.0036499 | Perk-mediated unfolded protein response                                                                 | 3  | 0.00312 |



|            |                                                                                                                  |    |         |
|------------|------------------------------------------------------------------------------------------------------------------|----|---------|
|            | Positive regulation of transcription from rna polymerase ii promoter in response to endoplasmic reticulum stress | 3  | 0.00312 |
| GO.1990440 | Platelet-derived growth factor receptor signaling pathway                                                        | 4  | 0.00341 |
| GO.0048008 | Response to temperature stimulus                                                                                 | 8  | 0.00344 |
| GO.0009266 | Vasculogenesis                                                                                                   | 5  | 0.00373 |
| GO.0001570 | Positive regulation of mesenchymal cell proliferation                                                            | 4  | 0.00379 |
| GO.0002053 | Response to wounding                                                                                             | 15 | 0.00387 |
| GO.0009611 | Rna localization                                                                                                 | 7  | 0.00416 |
| GO.0006403 | Cell proliferation                                                                                               | 14 | 0.00418 |
| GO.0008283 | Positive regulation of nitric oxide biosynthetic process                                                         | 4  | 0.00418 |
| GO.0045429 | Embryo development                                                                                               | 17 | 0.00425 |
| GO.0009790 | Multi-multicellular organism process                                                                             | 8  | 0.00448 |
| GO.0044706 | Response to calcium ion                                                                                          | 6  | 0.00448 |
| GO.0051592 | Hemopoiesis                                                                                                      | 12 | 0.00485 |
| GO.0030097 | Mrna export from nucleus                                                                                         | 5  | 0.0051  |
| GO.0006406 | Mrna-containing ribonucleoprotein complex export from nucleus                                                    | 5  | 0.0051  |
| GO.0071427 | Regulation of biological process                                                                                 | 77 | 0.00519 |
| GO.0050789 | Cellular response to external stimulus                                                                           | 9  | 0.00532 |
| GO.0071496 | Regulation of sequence-specific dna binding transcription factor activity                                        | 10 | 0.00533 |
| GO.0051090 | Leukocyte aggregation                                                                                            | 8  | 0.00547 |
| GO.0070486 | Regulation of molecular function                                                                                 | 32 | 0.0056  |
| GO.0065009 | Male gonad development                                                                                           | 6  | 0.00599 |
| GO.0008584 | Organ regeneration                                                                                               | 5  | 0.00599 |
| GO.0031100 | Symbiosis                                                                                                        |    |         |
| GO.0044403 | Development of primary male sexual characteristics                                                               | 6  | 0.00599 |
| GO.0046546 | Regulation of catalytic activity                                                                                 | 28 | 0.00599 |
| GO.0050790 | Regulation of response to wounding                                                                               | 10 | 0.00599 |
| GO.1903034 | Regulation of leukocyte differentiation                                                                          | 8  | 0.006   |
| GO.1902105 | Positive regulation of leukocyte chemotaxis                                                                      | 5  | 0.00673 |
| GO.0002690 | Response to bacterium                                                                                            | 11 | 0.00687 |
| GO.0009617 | Regulation of cell communication                                                                                 | 33 | 0.00687 |
| GO.0010646 | Cytoplasmic transport                                                                                            | 14 | 0.00687 |
| GO.0016482 | Chordate embryonic development                                                                                   | 13 | 0.00687 |
| GO.0043009 | Regulation of p38mapk cascade                                                                                    | 3  | 0.00687 |
| GO.1900744 | Regulation of neuron death                                                                                       | 8  | 0.00687 |
| GO.1901214 | Myeloid leukocyte migration                                                                                      | 5  | 0.007   |
| GO.0097529 | Chemotaxis                                                                                                       | 13 | 0.00725 |
| GO.0006935 | Positive regulation of reactive oxygen species metabolic process                                                 | 5  | 0.00736 |
| GO.2000379 |                                                                                                                  |    |         |

|            |                                                           |    |         |
|------------|-----------------------------------------------------------|----|---------|
| GO.0009749 | Response to glucose                                       | 6  | 0.00754 |
| GO.0044319 | Wound healing                                             |    |         |
| GO.0090505 | Epiboly involved in wound healing                         | 3  | 0.00806 |
| GO.0016265 | Death                                                     | 18 | 0.00862 |
| GO.0044763 | Single-organism cellular process                          | 80 | 0.00882 |
| GO.0023014 | Signal transduction by protein phosphorylation            | 8  | 0.00901 |
| GO.0071277 | Cellular response to calcium ion                          | 4  | 0.00901 |
| GO.0001763 | Morphogenesis of a branching structure                    | 7  | 0.00933 |
| GO.0002682 | Regulation of immune system process                       | 20 | 0.00933 |
| GO.0007568 | Aging                                                     | 8  | 0.00933 |
| GO.0030728 | Ovulation                                                 | 3  | 0.00933 |
| GO.0050727 | Regulation of inflammatory response                       | 8  | 0.00933 |
| GO.0071166 | Ribonucleoprotein complex localization                    | 5  | 0.00933 |
| GO.0008285 | Negative regulation of cell proliferation                 | 13 | 0.00939 |
| GO.0045637 | Regulation of myeloid cell differentiation                | 7  | 0.00939 |
| GO.0046649 | Lymphocyte activation                                     | 9  | 0.0094  |
| GO.0017038 | Protein import                                            | 6  | 0.00956 |
| GO.0045595 | Regulation of cell differentiation                        | 21 | 0.00958 |
| GO.0043523 | Regulation of neuron apoptotic process                    | 7  | 0.00992 |
| GO.0048589 | Developmental growth                                      | 9  | 0.00998 |
| GO.0051054 | Positive regulation of dna metabolic process              | 6  | 0.0102  |
| GO.1901654 | Response to ketone                                        | 6  | 0.0102  |
| GO.0030155 | Regulation of cell adhesion                               | 12 | 0.0105  |
| GO.0031175 | Neuron projection development                             | 13 | 0.0105  |
| GO.0071241 | Cellular response to inorganic substance                  | 6  | 0.0105  |
| GO.1901653 | Cellular response to peptide                              | 9  | 0.0105  |
| GO.0051093 | Negative regulation of developmental process              | 15 | 0.0106  |
| GO.0071417 | Cellular response to organonitrogen compound              | 11 | 0.0107  |
| GO.0048732 | Gland development                                         | 10 | 0.0108  |
| GO.0070301 | Cellular response to hydrogen peroxide                    | 4  | 0.0108  |
| GO.0051179 | Localization                                              | 43 | 0.0109  |
| GO.0043409 | Negative regulation of mapk cascade                       | 6  | 0.0112  |
| GO.0060711 | Labyrinthine layer development                            | 4  | 0.0115  |
|            | Negative regulation of cellular protein metabolic process |    |         |
| GO.0032269 |                                                           | 16 | 0.0116  |
| GO.0048468 | Cell development                                          | 22 | 0.0117  |
| GO.0000288 | Nuclear-transcribed mrna catabolic process                |    |         |
|            | Positive regulation of smooth muscle cell proliferation   |    |         |
| GO.0048661 |                                                           | 4  | 0.0123  |
|            | Negative regulation of multicellular organismal process   |    |         |
| GO.0051241 |                                                           | 16 | 0.0125  |
| GO.0034614 | Cellular response to reactive oxygen species              | 5  | 0.0126  |
|            | Regulation of reactive oxygen species metabolic process   |    |         |
| GO.2000377 |                                                           | 6  | 0.0128  |
| GO.0001892 | Embryonic placenta development                            | 5  | 0.0129  |
| GO.0009887 | Organ morphogenesis                                       | 15 | 0.0129  |

|            |                                                           |    |        |
|------------|-----------------------------------------------------------|----|--------|
| GO.0009987 | Cellular process                                          | 92 | 0.0129 |
| GO.0010332 | Response to gamma radiation                               | 4  | 0.0129 |
| GO.0030335 | Positive regulation of cell migration                     | 9  | 0.0129 |
| GO.0031099 | Regeneration                                              | 6  | 0.0129 |
| GO.0032101 | Regulation of response to external stimulus               | 15 | 0.0129 |
| GO.0042493 | Response to drug                                          | 10 | 0.0129 |
| GO.0046661 | Male sex differentiation                                  | 6  | 0.0129 |
| GO.0060713 | Labyrinthine layer morphogenesis                          | 3  | 0.0132 |
| GO.0032270 | Positive regulation of cellular protein metabolic process | 19 | 0.0135 |
| GO.0042060 | Wound healing                                             | 13 | 0.0137 |
| GO.0043434 | Response to peptide hormone                               | 10 | 0.0137 |
| GO.0043488 | Regulation of mrna stability                              | 4  | 0.0137 |
| GO.0051384 | Response to glucocorticoid                                | 6  | 0.0137 |
| GO.0061564 | Axon development                                          | 11 | 0.0137 |
| GO.0071333 | Cellular response to glucose stimulus                     | 4  | 0.0137 |
| GO.0032675 | Regulation of interleukin-6 production                    | 5  | 0.0139 |
| GO.0080134 | Regulation of response to stress                          | 20 | 0.0142 |
| GO.0060688 | Regulation of morphogenesis of a branching structure      | 4  | 0.0145 |
| GO.0001890 | Placenta development                                      | 6  | 0.0146 |
| GO.0001817 | Regulation of cytokine production                         | 11 | 0.0153 |
| GO.0016337 | Single organismal cell-cell adhesion                      | 10 | 0.0153 |
| GO.0030213 | Hyaluronan biosynthetic process                           | 2  | 0.0153 |
| GO.0031427 | Response to methotrexate                                  | 2  | 0.0153 |
| GO.0050679 | Positive regulation of epithelial cell proliferation      | 6  | 0.0153 |
| GO.0071900 | Regulation of protein serine/threonine kinase activity    | 10 | 0.0153 |
| GO.0006606 | Protein import into nucleus                               | 5  | 0.0155 |
| GO.0044744 | Protein targeting to nucleus                              | 5  | 0.0155 |
| GO.1901342 | Regulation of vasculature development                     | 7  | 0.0158 |
| GO.0030595 | Leukocyte chemotaxis                                      | 5  | 0.016  |
| GO.0032869 | Cellular response to insulin stimulus                     | 7  | 0.016  |
| GO.0045669 | Positive regulation of osteoblast differentiation         | 4  | 0.016  |
| GO.0048024 | Regulation of mrna splicing                               |    |        |
| GO.0048666 | Neuron development                                        | 14 | 0.0162 |
| GO.0002683 | Negative regulation of immune system process              | 9  | 0.0166 |
| GO.0009408 | Response to heat                                          | 6  | 0.0166 |
| GO.0051052 | Regulation of dna metabolic process                       | 8  | 0.0166 |
| GO.0071345 | Cellular response to cytokine stimulus                    | 11 | 0.0166 |
| GO.0006986 | Response to unfolded protein                              | 6  | 0.0169 |
| GO.0002009 | Morphogenesis of an epithelium                            | 10 | 0.017  |
| GO.0048639 | Positive regulation of developmental growth               | 6  | 0.0175 |
| GO.0048667 | Cell morphogenesis involved in neuron differentiation     | 11 | 0.0178 |
| GO.0016032 | Viral process                                             | 13 | 0.0181 |

|            |                                                    |    |        |
|------------|----------------------------------------------------|----|--------|
| GO.0008219 | Cell death                                         | 17 | 0.0182 |
| GO.0031668 | Cellular response to extracellular stimulus        | 7  | 0.0182 |
| GO.0042110 | T cell activation                                  | 7  | 0.0182 |
| GO.0010038 | Response to metal ion                              | 8  | 0.0184 |
|            | Transmembrane receptor protein                     |    |        |
| GO.0007178 | serine/threonine kinase signaling pathway          | 7  | 0.0186 |
|            | Negative regulation of response to biotic          |    |        |
| GO.0002832 | stimulus                                           | 3  | 0.0194 |
| GO.0006376 | Mrna splice site selection                         | 3  | 0.0194 |
| GO.0060669 | Embryonic placenta morphogenesis                   | 3  | 0.0194 |
| GO.1903708 | Positive regulation of hemopoiesis                 | 6  | 0.0194 |
| GO.0051248 | Negative regulation of protein metabolic process   | 16 | 0.0199 |
| GO.0048812 | Neuron projection morphogenesis                    | 11 | 0.0207 |
| GO.0060710 | Chorio-allantoic fusion                            | 2  | 0.0207 |
| GO.0060754 | Positive regulation of mast cell chemotaxis        | 2  | 0.0207 |
|            | Positive regulation of cell proliferation involved |    |        |
| GO.1901724 | in kidney development                              | 2  | 0.0207 |
|            | Negative regulation of glucocorticoid receptor     |    |        |
| GO.2000323 | signaling pathway                                  | 2  | 0.0207 |
| GO.0060326 | Cell chemotaxis                                    | 6  | 0.021  |
| GO.0033280 | Response to vitamin d                              | 3  | 0.0214 |
| GO.0042327 | Positive regulation of phosphorylation             | 14 | 0.0219 |
| GO.0007346 | Regulation of mitotic cell cycle                   | 10 | 0.0221 |
| GO.0034248 | Regulation of cellular amide metabolic process     | 8  | 0.0222 |
| GO.0005979 | Regulation of glycogen biosynthetic process        | 3  | 0.0234 |
| GO.0014072 | Response to isoquinoline alkaloid                  | 3  | 0.0234 |
| GO.0030325 | Adrenal gland development                          | 3  | 0.0234 |
| GO.0045740 | Positive regulation of dna replication             | 4  | 0.0243 |
| GO.0048878 | Chemical homeostasis                               | 14 | 0.0245 |
| GO.0009896 | Positive regulation of catabolic process           | 10 | 0.0256 |
| GO.0045596 | Negative regulation of cell differentiation        | 12 | 0.0271 |
| GO.0002761 | Regulation of myeloid leukocyte differentiation    | 5  | 0.0275 |
|            | Regulation of oxidative stress-induced neuron      |    |        |
| GO.1903203 | death                                              | 2  | 0.0275 |
| GO.0071375 | Cellular response to peptide hormone stimulus      | 8  | 0.028  |
| GO.0030212 | Hyaluronan metabolic process                       | 3  | 0.0283 |
|            | Negative regulation of smooth muscle cell          |    |        |
| GO.0048662 | proliferation                                      | 3  | 0.0283 |
| GO.0043407 | Negative regulation of map kinase activity         | 4  | 0.0284 |
| GO.0006915 | Apoptotic process                                  | 16 | 0.0288 |
|            | Negative regulation of protein serine/threonine    |    |        |
| GO.0071901 | kinase activity                                    | 5  | 0.0305 |
| GO.0007565 | Female pregnancy                                   | 6  | 0.0308 |
| GO.0061138 | Morphogenesis of a branching epithelium            | 6  | 0.0308 |
|            | Regulation of vascular endothelial growth factor   |    |        |
| GO.0010574 | production                                         | 3  | 0.0309 |

|            |                                                                                              |    |        |
|------------|----------------------------------------------------------------------------------------------|----|--------|
| GO.0007409 | Axonogenesis                                                                                 | 10 | 0.0311 |
| GO.0048729 | Tissue morphogenesis                                                                         | 11 | 0.0311 |
| GO.0051707 | Response to other organism                                                                   | 12 | 0.0311 |
| GO.0071248 | Cellular response to metal ion                                                               | 5  | 0.0311 |
| GO.0044092 | Negative regulation of molecular function                                                    | 16 | 0.0318 |
| GO.0051960 | Regulation of nervous system development                                                     | 12 | 0.0319 |
| GO.0001889 | Liver development                                                                            | 5  | 0.032  |
| GO.0006275 | Regulation of dna replication                                                                | 5  | 0.0327 |
|            | Negative regulation of insulin receptor signaling pathway                                    | 3  | 0.0327 |
| GO.0046627 | pathway                                                                                      | 3  | 0.0327 |
| GO.0050767 | Regulation of neurogenesis                                                                   | 11 | 0.0327 |
| GO.0060674 | Placenta blood vessel development                                                            | 3  | 0.0327 |
| GO.0070663 | Regulation of leukocyte proliferation                                                        | 6  | 0.0327 |
| GO.1904018 | Positive regulation of vasculature development                                               | 5  | 0.0327 |
| GO.0030030 | Cell projection organization                                                                 | 15 | 0.0329 |
| GO.0002666 | Positive regulation of t cell tolerance induction                                            | 2  | 0.0339 |
| GO.0021796 | Cerebral cortex regionalization                                                              | 2  | 0.0339 |
| GO.0030324 | Lung development                                                                             | 6  | 0.0339 |
| GO.0031620 | Regulation of fever generation                                                               | 2  | 0.0339 |
|            | Negative regulation of lipopolysaccharide-mediated signaling pathway                         | 2  | 0.0339 |
| GO.0031665 | mediated signaling pathway                                                                   | 2  | 0.0339 |
| GO.0035767 | Endothelial cell chemotaxis                                                                  | 2  | 0.0339 |
| GO.0071559 | Response to transforming growth factor beta                                                  | 6  | 0.0339 |
| GO.0061008 | Hepaticobiliary system development                                                           | 5  | 0.0346 |
| GO.0065007 | Biological regulation                                                                        | 75 | 0.0354 |
| GO.0030217 | T cell differentiation                                                                       | 5  | 0.0358 |
| GO.2000177 | Regulation of neural precursor cell proliferation                                            | 4  | 0.0366 |
| GO.0030323 | Respiratory tube development                                                                 | 6  | 0.0375 |
| GO.0051249 | Regulation of lymphocyte activation                                                          | 8  | 0.038  |
| GO.0030879 | Mammary gland development                                                                    | 5  | 0.0381 |
|            | Modification of morphology or physiology of other organism involved in symbiotic interaction | 4  | 0.0382 |
| GO.0051817 | other organism involved in symbiotic interaction                                             | 4  | 0.0382 |
| GO.0001934 | Positive regulation of protein phosphorylation                                               | 13 | 0.0401 |
| GO.0006468 | Protein phosphorylation                                                                      | 13 | 0.0401 |
| GO.0031669 | Cellular response to nutrient levels                                                         | 6  | 0.0401 |
| GO.0042594 | Response to starvation                                                                       | 6  | 0.0401 |
| GO.0071222 | Cellular response to lipopolysaccharide                                                      | 5  | 0.0405 |
| GO.0045597 | Positive regulation of cell differentiation                                                  | 13 | 0.0412 |
| GO.0044267 | Cellular protein metabolic process                                                           | 34 | 0.0415 |
| GO.1902107 | Positive regulation of leukocyte differentiation                                             | 5  | 0.0415 |
| GO.0016973 | Poly(a)+ mrna export from nucleus                                                            | 2  | 0.0416 |
| GO.0051234 | Establishment of localization                                                                | 35 | 0.0416 |
| GO.0097190 | Apoptotic signaling pathway                                                                  | 8  | 0.0422 |
| GO.0070555 | Response to interleukin-1                                                                    | 4  | 0.0431 |
| GO.0045765 | Regulation of angiogenesis                                                                   | 6  | 0.046  |
| GO.0045860 | Positive regulation of protein kinase activity                                               | 9  | 0.046  |

|            |                                              |    |        |
|------------|----------------------------------------------|----|--------|
| GO.0001666 | Response to hypoxia                          | 7  | 0.0463 |
| GO.0002684 | Positive regulation of immune system process | 13 | 0.0469 |
| GO.0010212 | Response to ionizing radiation               | 5  | 0.0483 |
| GO.0080135 | Regulation of cellular response to stress    | 12 | 0.0485 |
| GO.0050678 | Regulation of epithelial cell proliferation  | 7  | 0.049  |
| GO.0030098 | Lymphocyte differentiation                   | 6  | 0.0491 |
| GO.0010761 | Fibroblast migration                         | 2  | 0.0498 |
| GO.0070935 | 3'-utr-mediated mrna stabilization           | 2  | 0.0498 |
| GO.1900745 | Positive regulation of p38mapk cascade       | 2  | 0.0498 |

---

**Table S3.8.** KEGG pathway enrichment in downregulated group of OA versus normalcy

| Pathway ID | Pathway description                  | Observed gene count | False discovery rate |
|------------|--------------------------------------|---------------------|----------------------|
| 4668       | TNF signaling pathway                | 11                  | 3.76E-08             |
| 4010       | MAPK signaling pathway               | 14                  | 2.17E-07             |
| 4380       | Osteoclast differentiation           | 9                   | 1.37E-05             |
| 5168       | Herpes simplex infection             | 10                  | 1.98E-05             |
| 5166       | HTLV-I infection                     | 11                  | 5.71E-05             |
| 3040       | Spliceosome                          | 8                   | 9.03E-05             |
| 4068       | FoxO signaling pathway               | 7                   | 0.000601             |
| 4151       | PI3K-Akt signaling pathway           | 11                  | 0.000601             |
| 5134       | Legionellosis                        | 5                   | 0.000885             |
| 4621       | NOD-like receptor signaling pathway  | 5                   | 0.00104              |
| 5206       | MicroRNAs in cancer                  | 7                   | 0.00133              |
|            | Non-alcoholic fatty liver disease    |                     |                      |
| 4932       | (NAFLD)                              | 7                   | 0.00145              |
| 5164       | Influenza A                          | 7                   | 0.00286              |
| 5162       | Measles                              | 6                   | 0.0048               |
| 4064       | NF-kappa B signaling pathway         | 5                   | 0.00563              |
| 5200       | Pathways in cancer                   | 9                   | 0.00563              |
|            | Cytokine-cytokine receptor           |                     |                      |
| 4060       | interaction                          | 8                   | 0.00629              |
| 4915       | Estrogen signaling pathway           | 5                   | 0.00647              |
|            | Chagas disease (American             |                     |                      |
| 5142       | trypanosomiasis)                     | 5                   | 0.00709              |
| 4620       | Toll-like receptor signaling pathway | 5                   | 0.00825              |
| 4630       | Jak-STAT signaling pathway           | 6                   | 0.00825              |
| 4710       | Circadian rhythm                     | 3                   | 0.0123               |
| 5133       | Pertussis                            | 4                   | 0.0142               |
| 5220       | Chronic myeloid leukemia             | 4                   | 0.0142               |
| 4152       | AMPK signaling pathway               | 5                   | 0.0143               |
| 5020       | Prion diseases                       | 3                   | 0.019                |
| 5169       | Epstein-Barr virus infection         | 6                   | 0.019                |
| 4910       | Insulin signaling pathway            | 5                   | 0.0201               |
| 5132       | Salmonella infection                 | 4                   | 0.0213               |
| 4640       | Hematopoietic cell lineage           | 4                   | 0.023                |
| 5161       | Hepatitis B                          | 5                   | 0.023                |
| 5323       | Rheumatoid arthritis                 | 4                   | 0.023                |
| 4930       | Type II diabetes mellitus            | 3                   | 0.0295               |
| 5144       | Malaria                              | 3                   | 0.0305               |
| 4660       | T cell receptor signaling pathway    | 4                   | 0.0345               |
| 5030       | Cocaine addiction                    | 3                   | 0.0345               |
| 4066       | HIF-1 signaling pathway              | 4                   | 0.0396               |
| 5210       | Colorectal cancer                    | 3                   | 0.0499               |

**Table S4.** Biological functions of 16 differential biomarker candidates.

| Entrez ID | Approved symbol | Approved name                            | Chromosomal location | Combined effects size <sup>1</sup> | Biological function                                                                                                                                                                                                                                                                                                                                                                                                                                                          |
|-----------|-----------------|------------------------------------------|----------------------|------------------------------------|------------------------------------------------------------------------------------------------------------------------------------------------------------------------------------------------------------------------------------------------------------------------------------------------------------------------------------------------------------------------------------------------------------------------------------------------------------------------------|
| 7111      | TMOD1           | Tropomodulin 1                           | 9q22.33              | -2.16                              | TMOD1 encodes tropomodulin 1, a member of the tropomodulin family. Tropomodulin 1 tightly caps tropomyosin-actin pointed ends, blocking actin monomer association and elongation of the pointed ends [1]. The overexpression of TMOD1 mediated by NF-kappaB was associated with enhanced growth of triple-negative breast cancer [2].<br>The role of TMOD1 in inflammatory diseases, especially in arthritis, has not been studied thoroughly.                               |
| 10248     | POP7            | POP7 homolog, ribonuclease P/MRP subunit | 7q22.1               | -0.87                              | The role of POP7 in inflammatory diseases, especially in arthritis, has not been studied thoroughly.                                                                                                                                                                                                                                                                                                                                                                         |
| 6442      | SGCA            | Sarcoglycan alpha                        | 17q21.33             | -2.74                              | SGCA encodes the alpha-sarcoglycan subunit of the dystrophin-glycoprotein complex whose absence resulted in the loss of linkage between the actin cytoskeleton and the extracellular matrix, causing the instability of sarcolemma under physical stress [3]. Mutations in this gene were associated with increased prevalence of limb-girdle muscular dystrophy [4,5]. The role of SGCA in inflammatory diseases, especially in arthritis, has not been studied thoroughly. |
| 3824      | KLRD1           | Killer cell lectin like receptor D1      | 12p13                | 1.35                               | KLRD1, also known as CD94, is a peptide-selective natural killer (NK) cell receptor. The higher level of CD94 was reported in RA patients response to TNF inhibitors therapy than in active RA patients [6]. CD94 also played a crucial role in the regulation of cytokine secretion in RA [7].                                                                                                                                                                              |
| 240       | ALOX5           | Arachidonate 5-lipoxygenase              | 10q11.21             | 1.36                               | ALOX5 encodes 5-lipoxygenase, an enzyme necessary for the oxidation of arachidonic acid to leukotriene A4. Leukotrienes, in turn, are major mediators of a variety of inflammatory and allergic conditions, including                                                                                                                                                                                                                                                        |



|       |        |                                                   |          |       |                                                                                                                                                                                                                                                                                                                                                                                                                                                        |
|-------|--------|---------------------------------------------------|----------|-------|--------------------------------------------------------------------------------------------------------------------------------------------------------------------------------------------------------------------------------------------------------------------------------------------------------------------------------------------------------------------------------------------------------------------------------------------------------|
| 57403 | RAB22A | RAB22A, member RAS oncogene family                | 20q13.32 | -1.20 | <p>arthritis [8].</p> <p>RAB22A encodes a member of the RAB family of small GTPases being implicated in the early endocytic pathway [9]. RAB22A may affect the transport from endosomes to the Golgi apparatus [10]. The overexpression of RAB22A promoted some tumor growth and invasion, such as melanoma and lung cancer [11,12].</p> <p>The role of RAB22A in inflammatory diseases, especially in arthritis, has not been studied thoroughly.</p> |
| 288   | ANK3   | Ankyrin 3                                         | 10q21.2  | -1.92 | <p>ANK3 encodes the ankyrin G protein that links the integral membrane proteins to the spectrin-actin cytoskeleton. ANK3 was originally localised at axon initial segments and nodes of Ranvier of neurons and was involved in the initiation and propagation of action potentials by grouping sodium channels [13].</p> <p>The role of ANK3 in inflammatory diseases, especially in arthritis, has not been studied thoroughly.</p>                   |
| 5774  | PTPN3  | Protein tyrosine phosphatase, non-receptor type 3 | 9q31     | -1.31 | <p>PTPN3 encodes a member of the protein tyrosine phosphatase family. Mutations of PTPN3 were known to be associated with a number of biological events, including cell proliferation, migration and cholangiocarcinoma recurrence [14].</p> <p>The role of PTPN3 in inflammatory diseases, especially in arthritis, has not been studied thoroughly.</p>                                                                                              |
| 3003  | GZMK   | Granzyme K                                        | 5q11.2   | 2.92  | <p>GZMK encodes granzyme K in the cytoplasmic granules of cytolytic T lymphocytes and natural killer cells, mediating target cell death and controlling inflammation. Extracellular granzyme K promoted proinflammatory responses in endothelial cells [15] and induced cytokine secretion by binding to Gram-negative bacteria and their cell-wall lipopolysaccharide [16].</p>                                                                       |
| 1191  | CLU    | Clusterin                                         | 8p21.1   | -2.17 | <p>CLU encodes clusterin. It has been suggested to be implicated in several biological processes such as</p>                                                                                                                                                                                                                                                                                                                                           |

|        |         |                                         |         |                                                                                                                                                                                                                                                                                                                                                              |
|--------|---------|-----------------------------------------|---------|--------------------------------------------------------------------------------------------------------------------------------------------------------------------------------------------------------------------------------------------------------------------------------------------------------------------------------------------------------------|
|        |         |                                         |         | tumor growth and cell death [17].<br>The role of CLU in inflammatory diseases, especially in arthritis, has not been studied thoroughly.                                                                                                                                                                                                                     |
| 3002   | GZMB    | Granzyme B                              | 14q12   | 2.61 GZMB encodes granzyme B which was demonstrated to be involved in the erosive progression of RA and may become prognostic biomarker of early RA [18]. High level of GZMB was found in the plasma and synovial fluid of RA patients [19].                                                                                                                 |
| 23194  | FBXL7   | F-box and leucine rich repeat protein 7 | 5p15.1  | -0.93 FBXL7 encodes a member of the F-box protein family. FBXL7 was reported to regulate mitotic cell cycle progression by poly-ubiquitinating and degrading Aurora A, a key mediator of mitotic spindle formation and chromosome segregation [20].<br>The role of FBXL7 in inflammatory diseases, especially in arthritis, has not been studied thoroughly. |
| 7293   | TNFRSF4 | TNF receptor superfamily member 4       | 1p36.33 | 1.26 TNFRSF4 encodes a member of the TNF receptor super family. TNFRSF4 and its ligands were the co-stimulatory molecules for T lymphocytes, controlled cytokine production from T cells, and regulated cytokine receptor signaling. They have become therapeutic targets for a number of inflammatory and autoimmune diseases [21].                         |
| 9235   | IL32    | Interleukin 32                          | 16p13.3 | 2.73 IL32 encodes a member of the cytokine family, interleukin 32 whose overexpression was induced by pathogens and proinflammatory cytokines. IL32 was also involved in the pathogenesis of inflammatory diseases and cancer [22].                                                                                                                          |
| 439921 | MXRA7   | Matrix remodeling associated 7          | 17q25.1 | -2.19 The role of MXRA7 in inflammatory diseases, especially in arthritis, has not been studied thoroughly.                                                                                                                                                                                                                                                  |
| 925    | CD8A    | CD8a molecule                           | 2p11.2  | 2.83 CD8A encodes CD8 alpha chain of the CD8 glycoprotein found on the surface of most cytotoxic T lymphocytes that acts for antigens recognition and T cells activation. The CD8 T cells function in both adaptive and innate immunity [23].                                                                                                                |

---

<sup>‡</sup>: Adopted from the the section of functional meta-analysis, which was independent to the biomarker selection.

---

## Reference

1. Yamashiro, S.; Gokhin, D.S.; Kimura, S.; Nowak, R.B.; Fowler, V.M. Tropomodulins: pointed-end capping proteins that regulate actin filament architecture in diverse cell types. *Cytoskeleton (Hoboken, N.J.)* **2012**, *69*, 337-370, doi:10.1002/cm.21031.
2. Ito-Kureha, T.; Koshikawa, N.; Yamamoto, M.; Semba, K.; Yamaguchi, N.; Yamamoto, T.; Seiki, M.; Inoue, J. Tropomodulin 1 expression driven by NF-kappaB enhances breast cancer growth. *Cancer research* **2015**, *75*, 62-72, doi:10.1158/0008-5472.can-13-3455.
3. Matsumura, K.; Campbell, K.P. Dystrophin-glycoprotein complex: its role in the molecular pathogenesis of muscular dystrophies. *Muscle & nerve* **1994**, *17*, 2-15, doi:10.1002/mus.880170103.
4. Liang, W.C.; Chou, P.C.; Hung, C.C.; Su, Y.N.; Kan, T.M.; Chen, W.Z.; Hayashi, Y.K.; Nishino, I.; Jong, Y.J. Probable high prevalence of limb-girdle muscular dystrophy type 2D in Taiwan. *Journal of the neurological sciences* **2016**, *362*, 304-308, doi:10.1016/j.jns.2016.02.002.
5. Reddy, H.M.; Hamed, S.A.; Lek, M.; Mitsushashi, S.; Estrella, E.; Jones, M.D.; Mahoney, L.J.; Duncan, A.R.; Cho, K.A.; Macarthur, D.G., et al. Homozygous nonsense mutation in SGCA is a common cause of limb-girdle muscular dystrophy in Assiut, Egypt. *Muscle & nerve* **2016**, *54*, 690-695, doi:10.1002/mus.25094.
6. Walsh, C.E.; Ryan, E.J.; O'Farrelly, C.; Golden-Mason, L.; FitzGerald, O.; Veale, D.J.; Bresnihan, B.; Fearon, U. Differential expression of NK receptors CD94 and NKG2A by T cells in rheumatoid arthritis patients in remission compared to active disease. *PloS one* **2011**, *6*, e27182, doi:10.1371/journal.pone.0027182.
7. de Matos, C.T.; Berg, L.; Michaelsson, J.; Fellander-Tsai, L.; Karre, K.; Soderstrom, K. Activating and inhibitory receptors on synovial fluid natural killer cells of arthritis patients: role of CD94/NKG2A in control of cytokine secretion. *Immunology* **2007**, *122*, 291-301, doi:10.1111/j.1365-2567.2007.02638.x.
8. Assimes, T.L.; Knowles, J.W.; Priest, J.R.; Basu, A.; Volcik, K.A.; Southwick, A.; Tabor, H.K.; Hartiala, J.; Allayee, H.; Grove, M.L., et al. Common polymorphisms of ALOX5 and ALOX5AP and risk of coronary artery disease. *Human genetics* **2008**, *123*, 399-408, doi:10.1007/s00439-008-0489-5.
9. Mesa, R.; Salomon, C.; Roggero, M.; Stahl, P.D.; Mayorga, L.S. Rab22a affects the morphology and function of the endocytic pathway. *Journal of cell science* **2001**, *114*, 4041-4049.
10. Mesa, R.; Magadan, J.; Barbieri, A.; Lopez, C.; Stahl, P.D.; Mayorga, L.S. Overexpression of Rab22a hampers the transport between endosomes and the Golgi apparatus. *Experimental cell research* **2005**, *304*, 339-353, doi:10.1016/j.yexcr.2004.11.017.
11. Su, F.; Chen, Y.; Zhu, S.; Li, F.; Zhao, S.; Wu, L.; Chen, X.; Su, J. RAB22A overexpression promotes the tumor growth of melanoma. *Oncotarget* **2016**, *7*, 71744-71753, doi:10.18632/oncotarget.12329.
12. Zhou, Y.; Wu, B.; Li, J.H.; Nan, G.; Jiang, J.L.; Chen, Z.N. Rab22a enhances CD147 recycling and is required for lung cancer cell migration and invasion. *Experimental cell research* **2017**, *357*, 9-16, doi:10.1016/j.yexcr.2017.04.020.
13. Zhou, D.; Lambert, S.; Malen, P.L.; Carpenter, S.; Boland, L.M.; Bennett, V. AnkyrinG is required for clustering of voltage-gated Na channels at axon initial segments and for normal action potential firing. *The Journal of cell biology* **1998**, *143*, 1295-1304.
14. Gao, Q.; Zhao, Y.J.; Wang, X.Y.; Guo, W.J.; Gao, S.; Wei, L.; Shi, J.Y.; Shi, G.M.; Wang, Z.C.; Zhang, Y.N., et al. Activating mutations in PTPN3 promote cholangiocarcinoma cell proliferation and migration and are associated with tumor recurrence in patients. *Gastroenterology* **2014**, *146*, 1397-1407, doi:10.1053/j.gastro.2014.01.062.

15. Sharma, M.; Merkulova, Y.; Raithatha, S.; Parkinson, L.G.; Shen, Y.; Cooper, D.; Granville, D.J. Extracellular granzyme K mediates endothelial activation through the cleavage of protease-activated receptor-1. *The FEBS journal* **2016**, *283*, 1734-1747, doi:10.1111/febs.13699.
16. Wensink, A.C.; Kemp, V.; Fermie, J.; Garcia Laorden, M.I.; van der Poll, T.; Hack, C.E.; Bovenschen, N. Granzyme K synergistically potentiates LPS-induced cytokine responses in human monocytes. *Proceedings of the National Academy of Sciences of the United States of America* **2014**, *111*, 5974-5979, doi:10.1073/pnas.1317347111.
17. Trougakos, I.P.; Lourda, M.; Antonelou, M.H.; Kletsas, D.; Gorgoulis, V.G.; Papassideri, I.S.; Zou, Y.; Margaritis, L.H.; Boothman, D.A.; Gonos, E.S. Intracellular clusterin inhibits mitochondrial apoptosis by suppressing p53-activating stress signals and stabilizing the cytosolic Ku70-Bax protein complex. *Clinical cancer research : an official journal of the American Association for Cancer Research* **2009**, *15*, 48-59, doi:10.1158/1078-0432.ccr-08-1805.
18. Goldbach-Mansky, R.; Suson, S.; Wesley, R.; Hack, C.E.; El-Gabalawy, H.S.; Tak, P.P. Raised granzyme B levels are associated with erosions in patients with early rheumatoid factor positive rheumatoid arthritis. *Annals of the rheumatic diseases* **2005**, *64*, 715-721, doi:10.1136/ard.2003.007039.
19. Tak, P.P.; Spaeny-Dekking, L.; Kraan, M.C.; Breedveld, F.C.; Froelich, C.J.; Hack, C.E. The levels of soluble granzyme A and B are elevated in plasma and synovial fluid of patients with rheumatoid arthritis (RA). *Clinical and experimental immunology* **1999**, *116*, 366-370.
20. Coon, T.A.; Glasser, J.R.; Mallampalli, R.K.; Chen, B.B. Novel E3 ligase component FBXL7 ubiquitinates and degrades Aurora A, causing mitotic arrest. *Cell cycle (Georgetown, Tex.)* **2012**, *11*, 721-729, doi:10.4161/cc.11.4.19171.
21. Croft, M.; So, T.; Duan, W.; Soroosh, P. The significance of OX40 and OX40L to T-cell biology and immune disease. *Immunological reviews* **2009**, *229*, 173-191, doi:10.1111/j.1600-065X.2009.00766.x.
22. Hong, J.T.; Son, D.J.; Lee, C.K.; Yoon, D.Y.; Lee, D.H.; Park, M.H. Interleukin 32, inflammation and cancer. *Pharmacology & therapeutics* **2017**, *174*, 127-137, doi:10.1016/j.pharmthera.2017.02.025.
23. Berg, R.E.; Forman, J. The role of CD8 T cells in innate immunity and in antigen non-specific protection. *Current opinion in immunology* **2006**, *18*, 338-343, doi:10.1016/j.coi.2006.03.010.

**Figure S1.** Principal component analysis of two batch effects removed data sets. (a) Set A (GSE1919, GSE39340, and GSE36700), (b) Set B (GSE55457, GSE55584, and GSE55235)

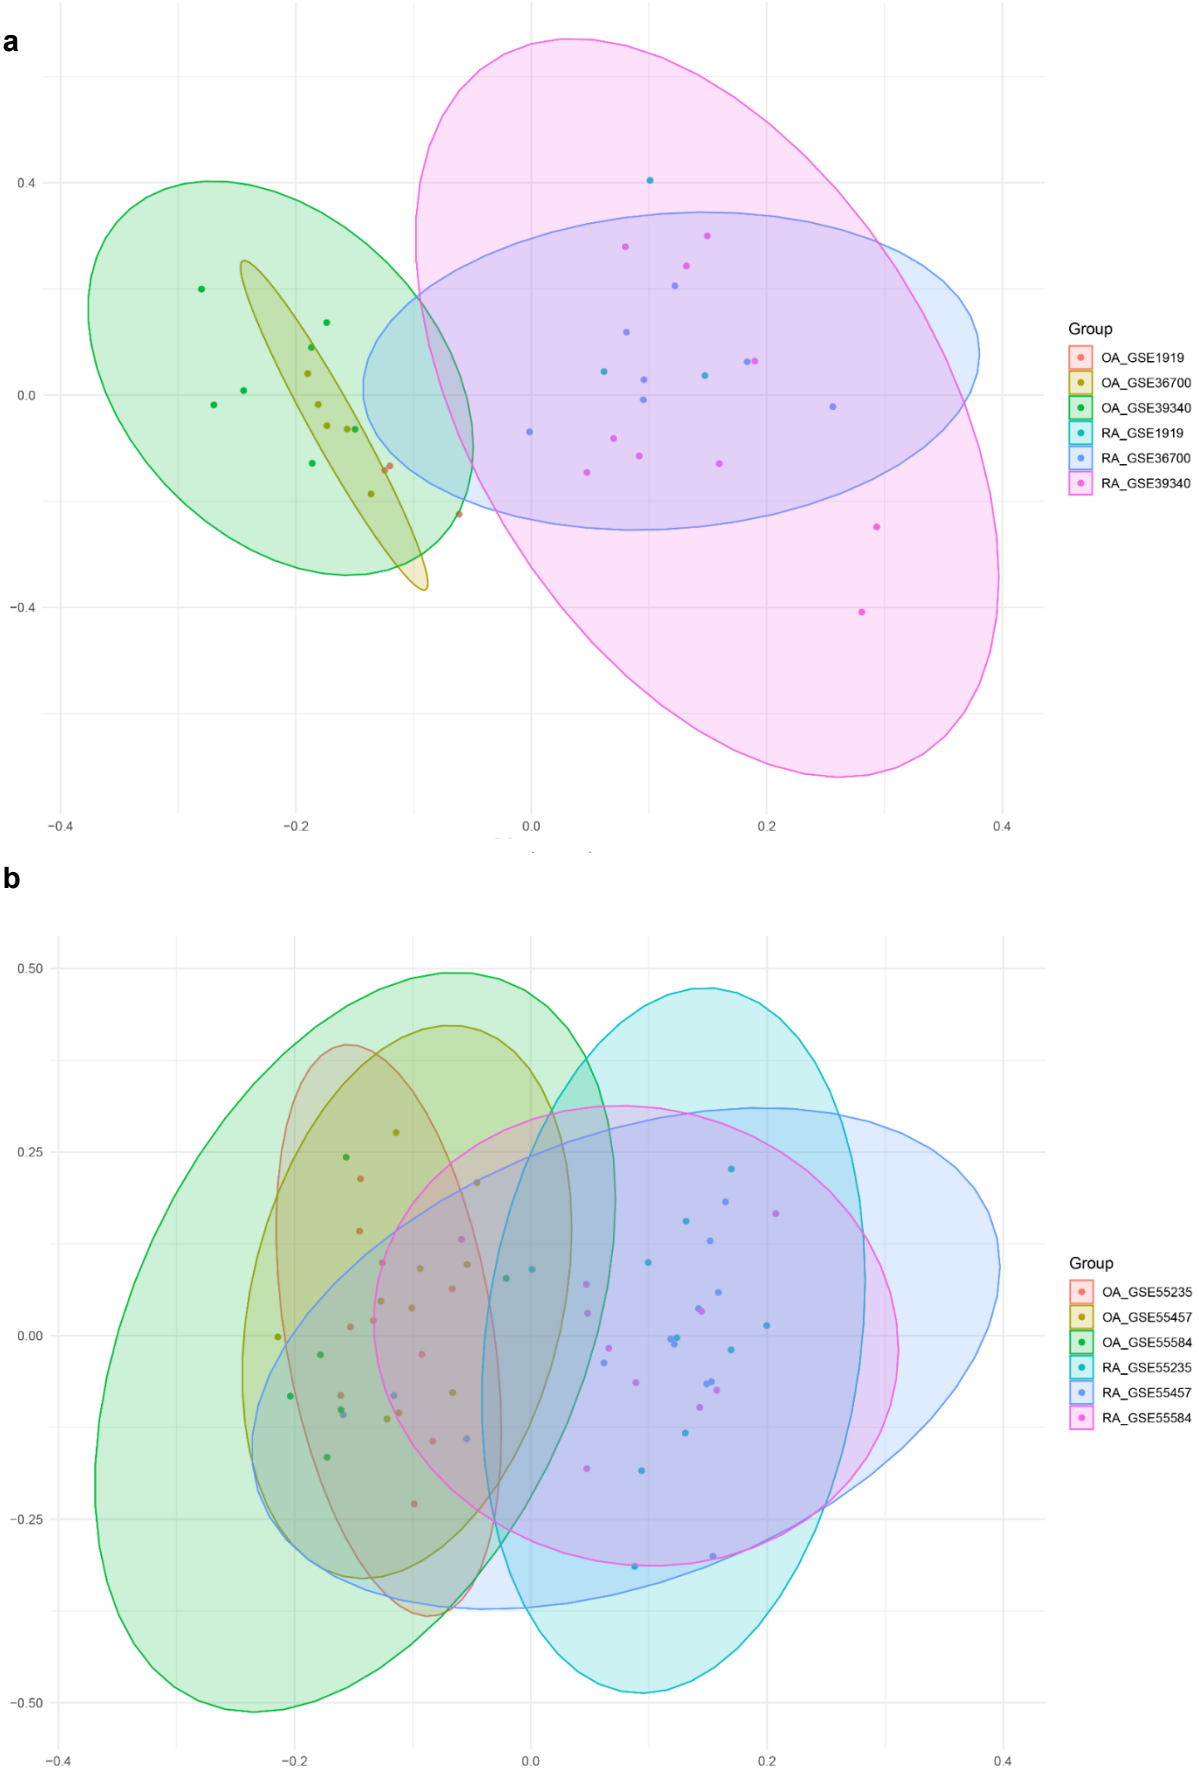

**Figure S2.** The STRING protein-protein interaction network of differentially expressed genes. (a) Up-regulated network. (b) Down-regulated network. According to STRING, red, green, blue, purple, yellow, light blue, and black strings demonstrated the presence of fusion, neighborhood, co-occurrence, experimental, text mining, database, and co-expression evidence, respectively.



## Data S1. Descriptive analysis and visualization of 16 predictors in RA versus OA

Summary statistic of 16 genes in the signature.

### Exploratory data analysis

17 Variables    59 Observations

---

#### Class

| n  | missing | distinct |
|----|---------|----------|
| 59 | 0       | 2        |

| Value      | OA    | RA    |
|------------|-------|-------|
| Frequency  | 26    | 33    |
| Proportion | 0.441 | 0.559 |

---

#### TMOD1

| n  | missing | distinct | Info | Mean  | Gmd    | .05   | .10   | .25   | .50   | .75   | .90   | .95    |
|----|---------|----------|------|-------|--------|-------|-------|-------|-------|-------|-------|--------|
| 59 | 0       | 59       | 1    | 8.846 | 0.6968 | 7.818 | 8.109 | 8.437 | 8.829 | 9.231 | 9.638 | 10.002 |

lowest : 7.610727 7.745064 7.772906 7.822517 7.958150, highest: 9.849471 10.000442 10.016928 10.065825 10.090771

---

#### POP7

| n  | missing | distinct | Info | Mean  | Gmd    | .05   | .10   | .25   | .50   | .75   | .90   | .95   |
|----|---------|----------|------|-------|--------|-------|-------|-------|-------|-------|-------|-------|
| 59 | 0       | 58       | 1    | 8.717 | 0.2745 | 8.352 | 8.393 | 8.568 | 8.715 | 8.855 | 9.024 | 9.095 |



lowest : 8.106792 8.266364 8.266836 8.361928 8.376697, highest: 9.070290 9.084416 9.192743 9.257256 9.316017

-----

**SGCA**

| n  | missing | distinct | Info | Mean  | Gmd    | .05   | .10   | .25   | .50   | .75   | .90   | .95   |
|----|---------|----------|------|-------|--------|-------|-------|-------|-------|-------|-------|-------|
| 59 | 0       | 59       | 1    | 7.181 | 0.6291 | 6.516 | 6.611 | 6.723 | 7.059 | 7.648 | 7.940 | 8.217 |

lowest : 6.183825 6.482914 6.485094 6.519905 6.539315, highest: 8.059750 8.215069 8.229736 8.309589 8.317227

-----

**KLRD1**

| n  | missing | distinct | Info | Mean  | Gmd    | .05   | .10   | .25   | .50   | .75   | .90   | .95   |
|----|---------|----------|------|-------|--------|-------|-------|-------|-------|-------|-------|-------|
| 59 | 0       | 59       | 1    | 7.089 | 0.2206 | 6.836 | 6.889 | 6.963 | 7.023 | 7.196 | 7.419 | 7.518 |

lowest : 6.735841 6.810775 6.833975 6.836329 6.854272, highest: 7.468002 7.517152 7.529966 7.569629 7.593283

-----

**ALOX5**

| n  | missing | distinct | Info | Mean  | Gmd   | .05   | .10   | .25   | .50   | .75   | .90   | .95   |
|----|---------|----------|------|-------|-------|-------|-------|-------|-------|-------|-------|-------|
| 59 | 0       | 59       | 1    | 8.197 | 0.441 | 7.626 | 7.659 | 7.871 | 8.165 | 8.488 | 8.671 | 8.848 |

lowest : 7.570915 7.575339 7.592925 7.629234 7.644564, highest: 8.729255 8.847581 8.847684 8.946761 8.991679

-----

**RAB22A**

| n  | missing | distinct | Info | Mean  | Gmd    | .05   | .10   | .25   | .50   | .75   | .90   | .95   |
|----|---------|----------|------|-------|--------|-------|-------|-------|-------|-------|-------|-------|
| 59 | 0       | 59       | 1    | 8.857 | 0.2703 | 8.470 | 8.497 | 8.720 | 8.851 | 9.013 | 9.155 | 9.242 |

lowest : 8.272843 8.324045 8.468389 8.469915 8.474224, highest: 9.200658 9.238832 9.266402 9.306271 9.323720

-----

**ANK3**

| n  | missing | distinct | Info | Mean  | Gmd    | .05   | .10   | .25   | .50   | .75   | .90   | .95   |
|----|---------|----------|------|-------|--------|-------|-------|-------|-------|-------|-------|-------|
| 59 | 0       | 59       | 1    | 8.353 | 0.8178 | 7.264 | 7.448 | 7.794 | 8.398 | 8.742 | 9.325 | 9.600 |

lowest : 6.898430 7.048985 7.206742 7.269947 7.314950, highest: 9.482349 9.599703 9.605982 9.788882 9.860875

---

### PTPN3

| n  | missing | distinct | Info | Mean  | Gmd    | .05   | .10   | .25   | .50   | .75   | .90   | .95   |
|----|---------|----------|------|-------|--------|-------|-------|-------|-------|-------|-------|-------|
| 59 | 0       | 59       | 1    | 7.785 | 0.2498 | 7.412 | 7.521 | 7.635 | 7.811 | 7.930 | 8.036 | 8.059 |

lowest : 7.339715 7.391992 7.407612 7.411971 7.441290, highest: 8.043195 8.051574 8.123203 8.158928 8.312575

---

### GZMK

| n  | missing | distinct | Info | Mean  | Gmd   | .05   | .10   | .25   | .50   | .75    | .90    | .95    |
|----|---------|----------|------|-------|-------|-------|-------|-------|-------|--------|--------|--------|
| 59 | 0       | 59       | 1    | 9.463 | 1.067 | 8.221 | 8.437 | 8.713 | 9.243 | 10.194 | 10.651 | 11.193 |

lowest : 7.590958 8.073029 8.132376 8.230423 8.263204, highest: 11.012626 11.172825 11.376806 11.466007 11.581469

---

### CLU

| n  | missing | distinct | Info | Mean  | Gmd   | .05   | .10   | .25   | .50   | .75   | .90   | .95   |
|----|---------|----------|------|-------|-------|-------|-------|-------|-------|-------|-------|-------|
| 59 | 0       | 59       | 1    | 12.33 | 1.068 | 10.33 | 10.92 | 11.85 | 12.46 | 13.03 | 13.42 | 13.49 |

lowest : 9.736136 10.071174 10.329075 10.335610 10.771648, highest: 13.473839 13.483270 13.504305 13.534891 13.687239

---

### GZMB

| n  | missing | distinct | Info | Mean  | Gmd    | .05   | .10   | .25   | .50   | .75   | .90   | .95   |
|----|---------|----------|------|-------|--------|-------|-------|-------|-------|-------|-------|-------|
| 59 | 0       | 59       | 1    | 7.041 | 0.9236 | 6.082 | 6.209 | 6.323 | 6.847 | 7.649 | 8.122 | 8.671 |

lowest : 5.675563 5.937515 6.031668 6.087965 6.090291, highest: 8.598172 8.671046 8.672235 8.687011 8.729226

-----

**FBXL7**

| n  | missing | distinct | Info | Mean  | Gmd    | .05   | .10   | .25   | .50   | .75   | .90   | .95   |
|----|---------|----------|------|-------|--------|-------|-------|-------|-------|-------|-------|-------|
| 59 | 0       | 59       | 1    | 9.112 | 0.3671 | 8.654 | 8.722 | 8.880 | 9.050 | 9.260 | 9.511 | 9.663 |

lowest : 8.508760 8.631044 8.640953 8.655982 8.664510, highest: 9.556073 9.634681 9.919319 9.926876 10.121697

-----

**TNFRSF4**

| n  | missing | distinct | Info | Mean  | Gmd    | .05   | .10   | .25   | .50   | .75   | .90   | .95   |
|----|---------|----------|------|-------|--------|-------|-------|-------|-------|-------|-------|-------|
| 59 | 0       | 59       | 1    | 7.076 | 0.1839 | 6.833 | 6.881 | 6.961 | 7.067 | 7.149 | 7.276 | 7.383 |

lowest : 6.764937 6.789501 6.798118 6.836650 6.840137, highest: 7.304520 7.381716 7.391577 7.424735 7.560860

-----

**IL32**

| n  | missing | distinct | Info | Mean  | Gmd    | .05   | .10   | .25   | .50   | .75   | .90    | .95    |
|----|---------|----------|------|-------|--------|-------|-------|-------|-------|-------|--------|--------|
| 59 | 0       | 59       | 1    | 9.007 | 0.9259 | 8.023 | 8.110 | 8.346 | 8.823 | 9.654 | 10.153 | 10.289 |

lowest : 7.252458 7.663641 8.010068 8.024958 8.040544, highest: 10.242136 10.284808 10.326930 10.397811 11.140009

-----

**MXRA7**

| n  | missing | distinct | Info | Mean  | Gmd    | .05   | .10   | .25   | .50   | .75   | .90   | .95   |
|----|---------|----------|------|-------|--------|-------|-------|-------|-------|-------|-------|-------|
| 59 | 0       | 59       | 1    | 12.09 | 0.4233 | 11.52 | 11.60 | 11.75 | 12.12 | 12.38 | 12.54 | 12.59 |

lowest : 11.42489 11.47054 11.50686 11.51939 11.54377, highest: 12.56083 12.56786 12.75576 12.76353 12.90759

-----

**CD8A**

| n  | missing | distinct | Info | Mean  | Gmd    | .05   | .10   | .25   | .50   | .75   | .90   | .95   |
|----|---------|----------|------|-------|--------|-------|-------|-------|-------|-------|-------|-------|
| 59 | 0       | 59       | 1    | 8.857 | 0.6964 | 7.985 | 8.134 | 8.348 | 8.762 | 9.251 | 9.615 | 9.967 |

lowest : 7.897155 7.952875 7.959216 7.988354 8.116281, highest: 9.922451 9.944335 10.169961 10.261575 10.328671

-----

**Note:** Descriptive analysis was conducted using Hmisc package in R

**Violin Plots of the expression levels of 16 genes in the signature.**

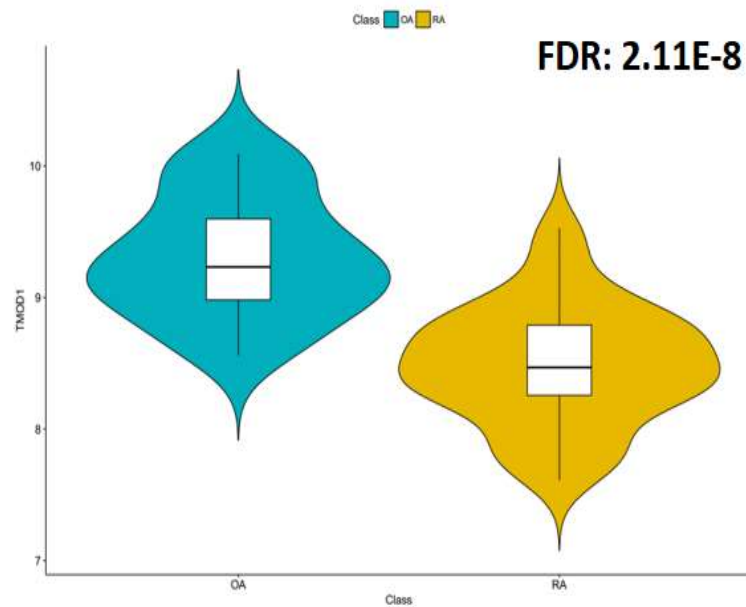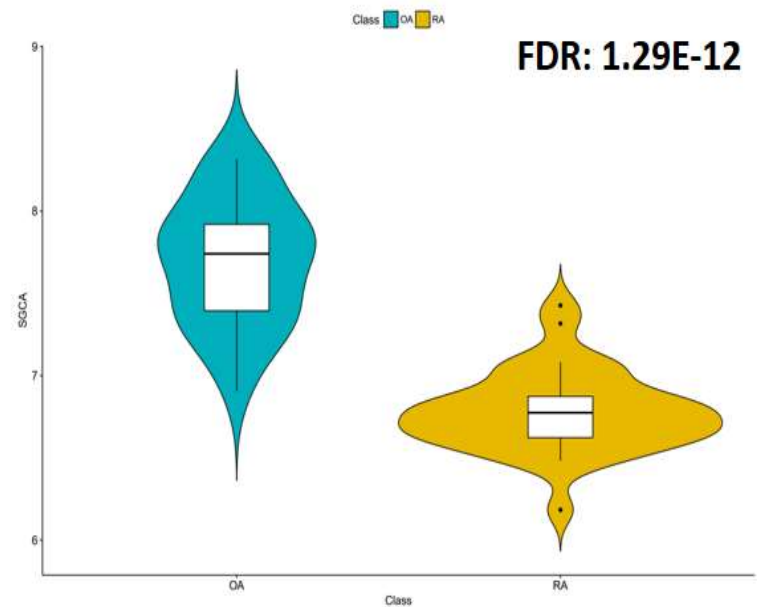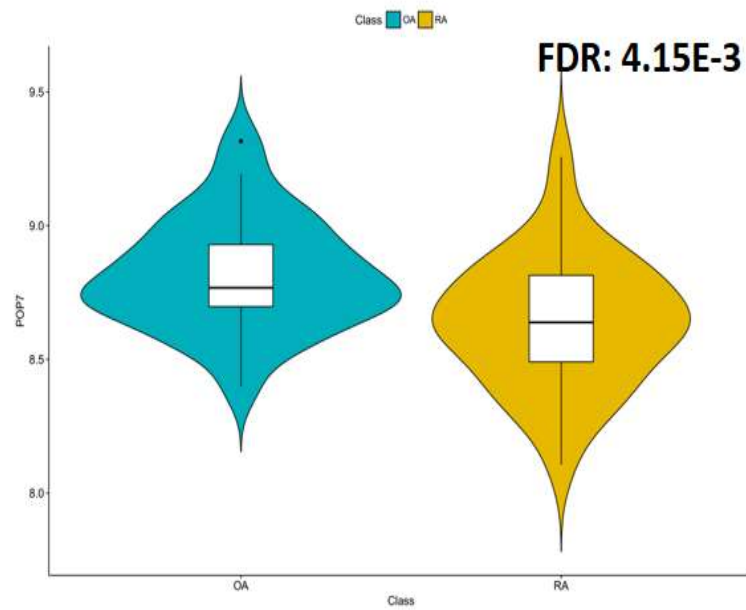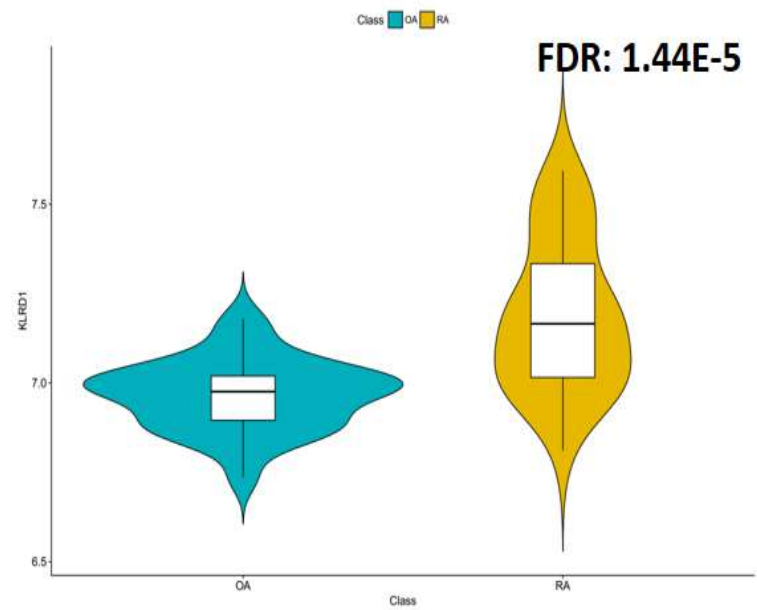

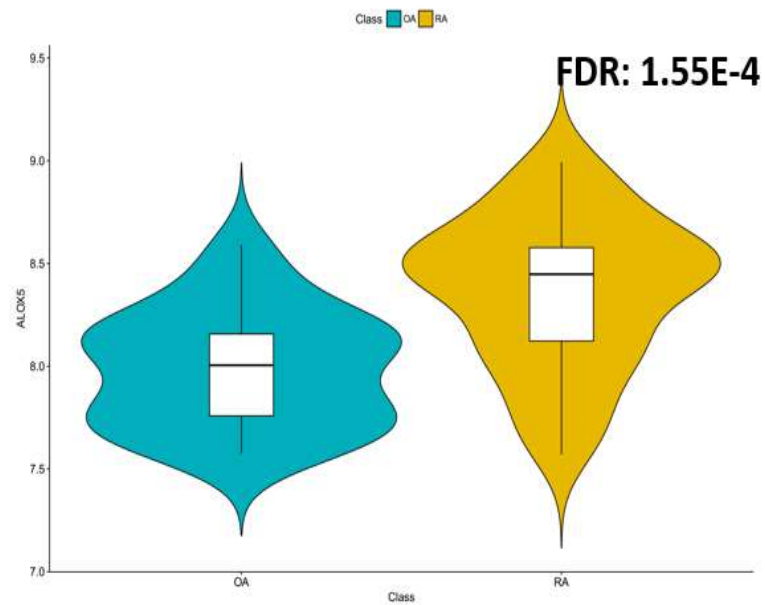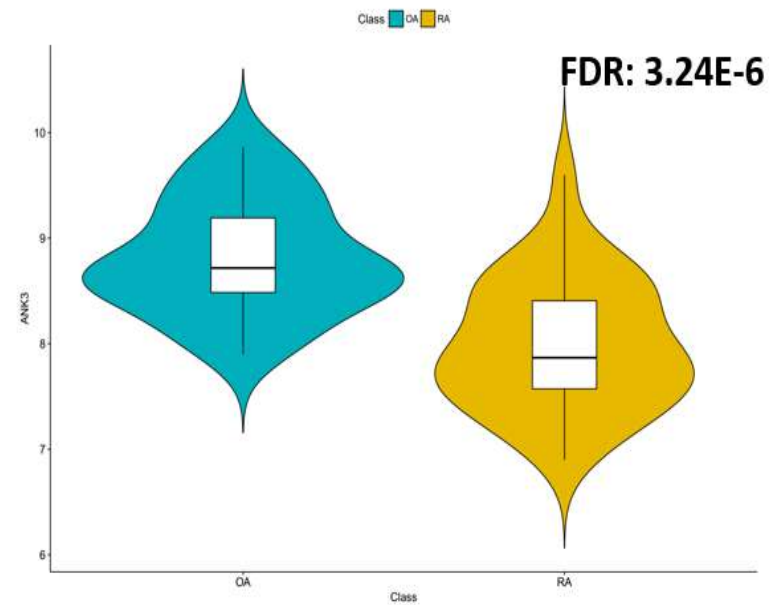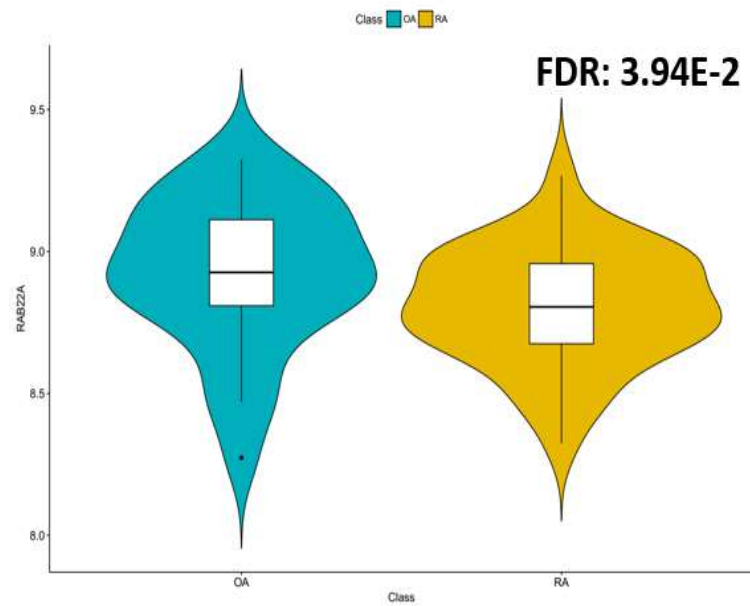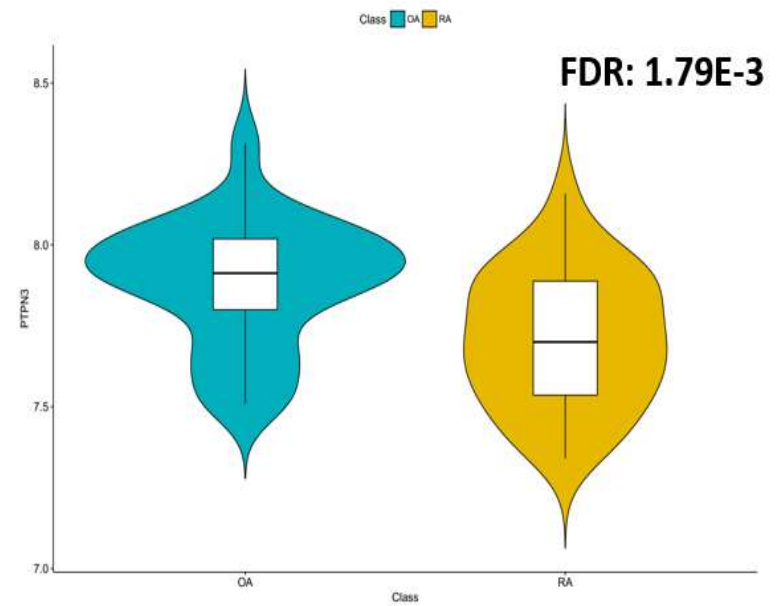

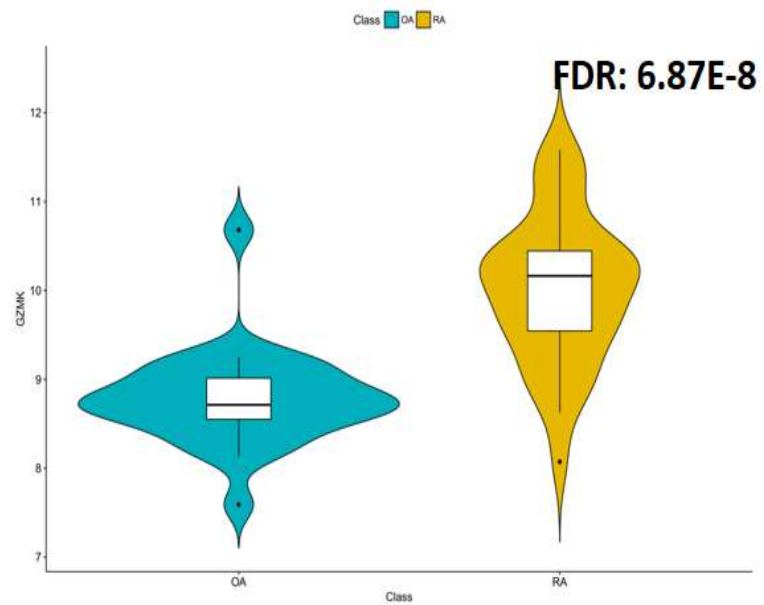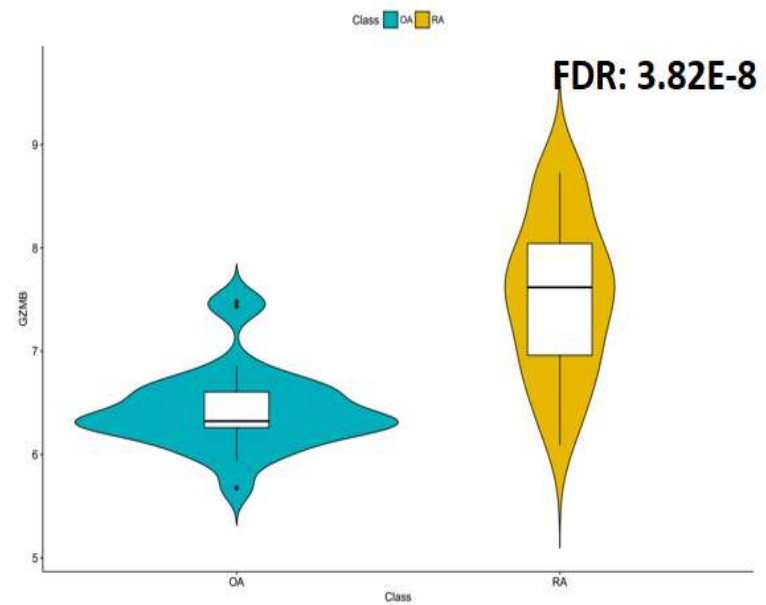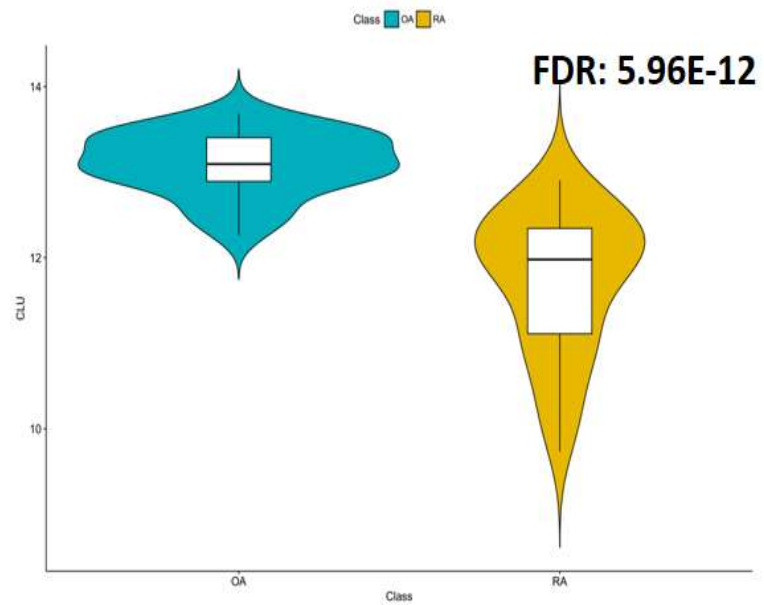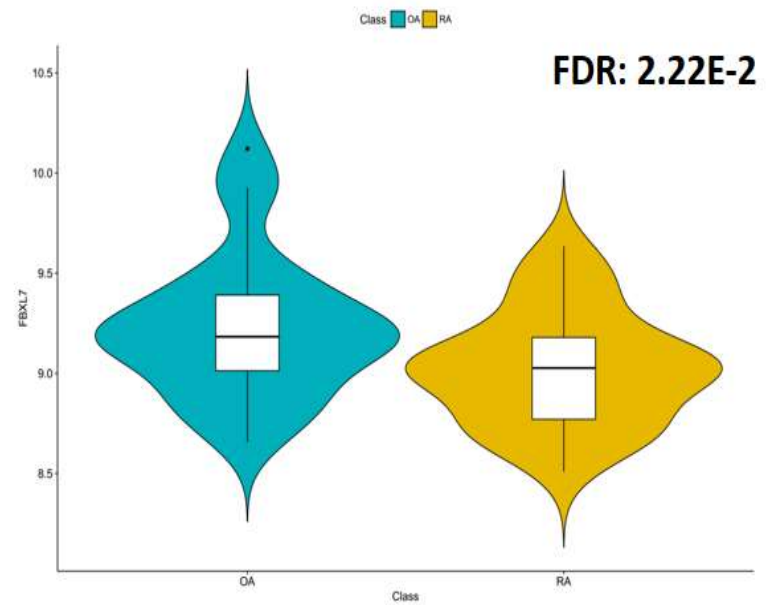

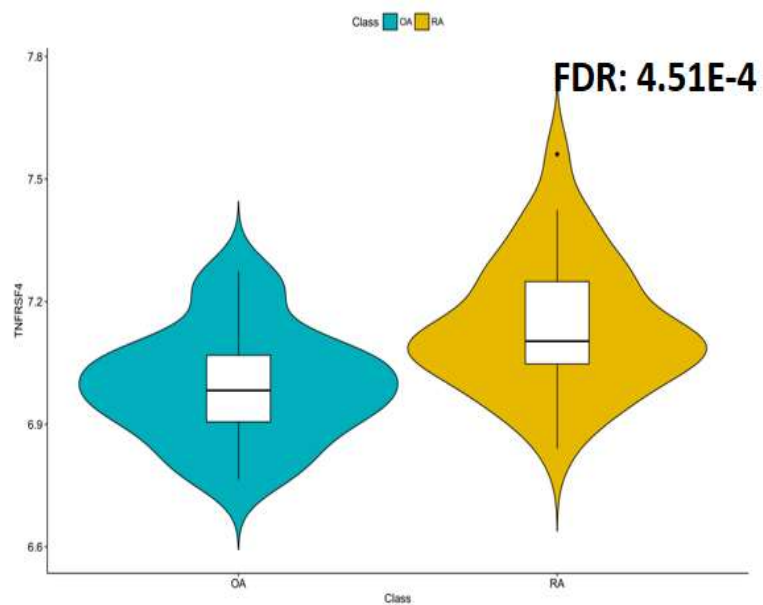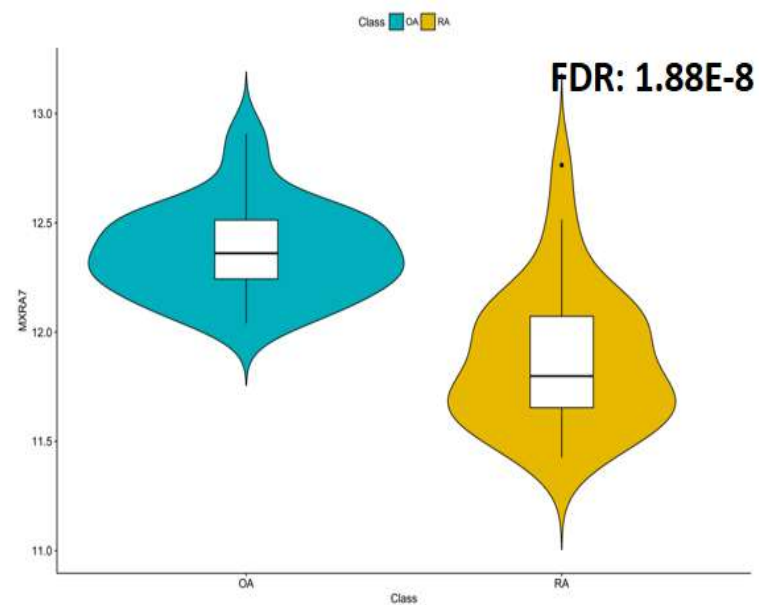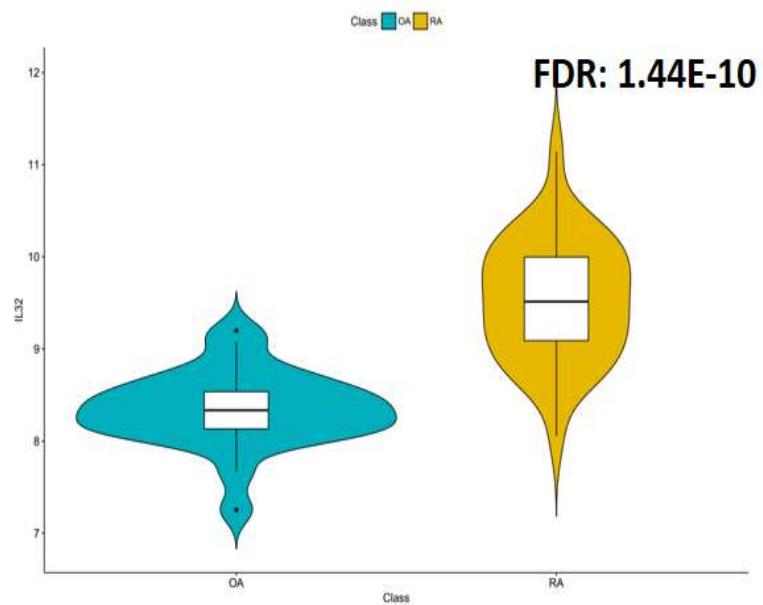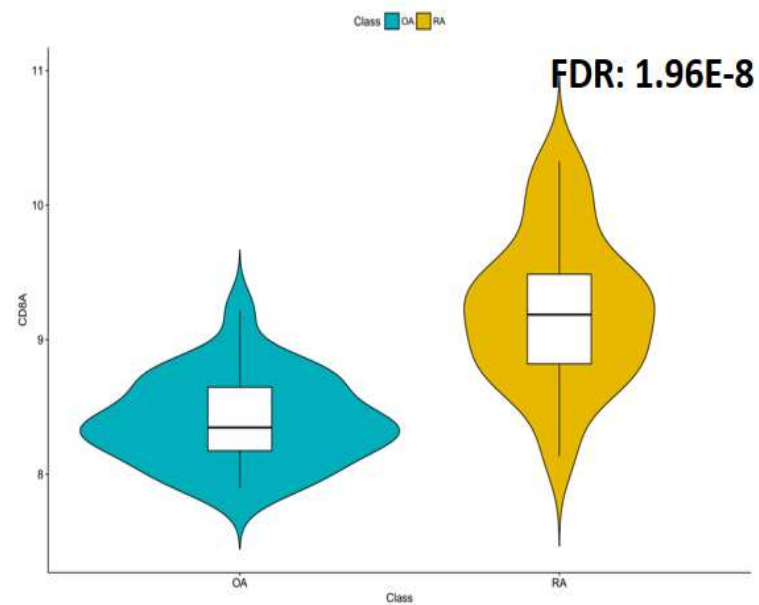

Supplement: s1 [file s1]
